# Supplementary material for: Photoinduced Atom Transfer Radical Addition/Cyclization Reaction between Alkynes or Alkenes with Unsaturated α-Halogenated Carbonyls
Source: MDPI journal article supplement (doi:10.3390/molecules26226781), 2021-11-10

---

## Photoinduced Atom Transfer Radical Addition/Cyclization Reaction Between Alkynes or Alkenes with Unsaturated $\alpha$ -Halogenated Carbonyls

Kazuki Matsuo, Tadashi Yoshitake, Eij Yamaguchi, Akichika Itoh

Laboratory of pharmaceutical synthetic chemistry, Gifu Pharmaceutical University

1-25-4, Daigaku-nishi, Gifu 501-1196, Japan

yamaguchi@gifu-pu.ac.jp; itoha@gifu-pu.ac.jp

### Table of contents

|                                                                                                                                  |            |
|----------------------------------------------------------------------------------------------------------------------------------|------------|
| <b>1. Optimization of reaction conditions</b>                                                                                    | <b>S1</b>  |
| Table S1. Optimization of catalyst                                                                                               |            |
| Table S2. Optimization of Amines                                                                                                 |            |
| Table S3. Screening of wavelength                                                                                                |            |
| Table S4. Screening of solvent                                                                                                   |            |
| Table S5. Screening of wavelength without amine                                                                                  |            |
| <b>2. Substrate scope</b>                                                                                                        | <b>S6</b>  |
| Table S6 Attempted alkynes for ATRA/ATRC reaction                                                                                |            |
| Table S7 Attempted alkenes for ATRA/ATRC reaction                                                                                |            |
| <b>3. Radical trapping experiment</b>                                                                                            | <b>S7</b>  |
| <b>4. Synthesis of cyclic compounds 3</b>                                                                                        | <b>S8</b>  |
| <b>5. Synthesis of cyclic compounds 5</b>                                                                                        | <b>S19</b> |
| <b>6. Synthesis of cyclic compounds 6</b>                                                                                        | <b>S26</b> |
| <b>7. References</b>                                                                                                             | <b>S29</b> |
| <b>8. <math>^1\text{H}</math> NMR, <math>^{13}\text{C}</math> NMR, <math>^{19}\text{F}</math> and DEPT-135 NMR Spectra of 3</b>  | <b>S30</b> |
| <b>9. <math>^1\text{H}</math> NMR, <math>^{13}\text{C}</math> NMR, <math>^{19}\text{F}</math> and DEPT-135 NMR Spectra of 5</b>  | <b>S57</b> |
| <b>10. <math>^1\text{H}</math> NMR, <math>^{13}\text{C}</math> NMR, <math>^{19}\text{F}</math> and DEPT-135 NMR Spectra of 6</b> | <b>S70</b> |
| <b>11. <math>^1\text{H}</math>-<math>^1\text{H}</math> NOESY spectrum of 6h</b>                                                  | <b>S80</b> |
| <b>12. <math>^1\text{H}</math> NMR and <math>^{13}\text{C}</math> NMR spectra of 7</b>                                           | <b>S81</b> |

## 1. Optimization of reaction conditions

**Table S1. Optimization of catalyst**

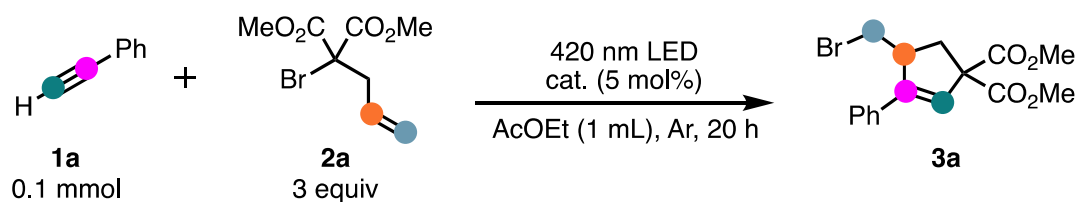

| entry | cat                                         | <b>3a</b> (%) |
|-------|---------------------------------------------|---------------|
| 1     | 4-CN-pyridine                               | 33            |
| 2     | 4-NH <sub>2</sub> -pyridine                 | no reaction   |
| 3     | 4-Ac-pyridine                               | 18            |
| 4     | 3-CN-pyridine                               | 17            |
| 5     | 2-CN-pyridine                               | no reaction   |
| 6     | 2,3-diCN-pyridine                           | no reaction   |
| 7     | DMAP                                        | no reaction   |
| 8     | 2-F-pyridine                                | no reaction   |
| 9     | 2-Cl-pyridine                               | no reaction   |
| 10    | 2-Br-pyridine                               | no reaction   |
| 11    | 3-Br-pyridine                               | 20            |
| 12    | 2-CHO-pyridine                              | no reaction   |
| 13    | 4-Et-pyridine                               | 45            |
| 14    | 2-Et-pyridine                               | no reaction   |
| 15    | 2-NH <sub>2</sub> CH <sub>2</sub> -pyridine | no reaction   |
| 16    | 2-NH <sub>2</sub> -6-MeO-pyridine           | no reaction   |

<sup>a</sup> <sup>1</sup>H NMR yields.

**Table S2. Optimization of Amines**

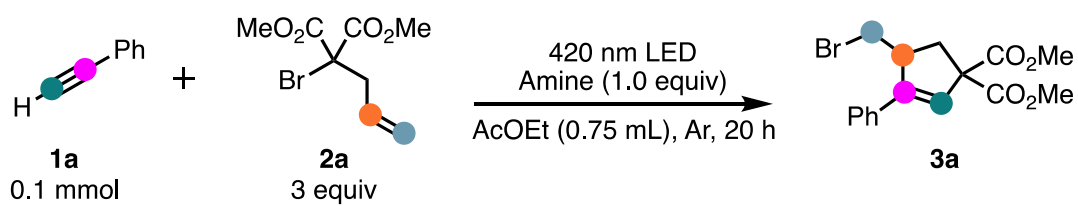

| entry | amines       | <b>3</b> (%) |
|-------|--------------|--------------|
| 1     | benzyl amine | 11           |
| 2     | pyrrolidine  | 56           |
| 3     | piperidine   | 35           |
| 4     | diethylamine | 51           |
| 5     | butylamine   | no reaction  |
| 6     | DIPEA        | 88           |

<sup>a</sup> <sup>1</sup>H NMR yields.

**Table S3. Screening of wavelength**

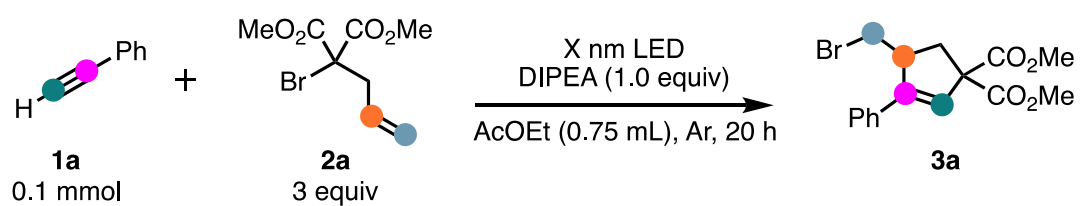

| entry | X (nm) | <b>3</b> (%) |
|-------|--------|--------------|
| 1     | 370    | 68           |
| 2     | 380    | 70           |
| 3     | 400    | 78           |
| 4     | 420    | 88           |
| 5     | 450    | 81           |
| 6     | 470    | 70           |
| 7     | 500    | trace        |

<sup>a</sup> <sup>1</sup>H NMR yields.



**Table S4. Screening of solvent**

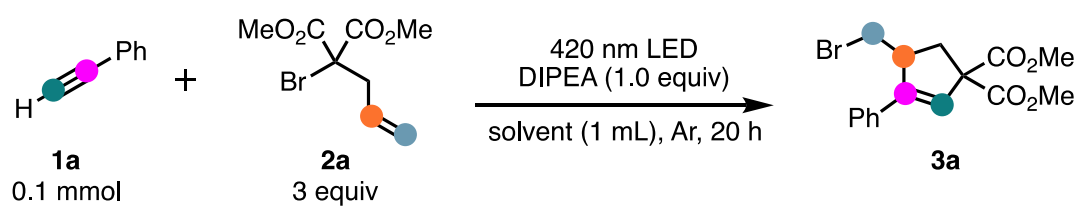

| entry | solvent           | <b>3a</b> (%) |
|-------|-------------------|---------------|
| 1     | IPA               | 40            |
| 2     | tBuOH             | 17            |
| 3     | THF               | 8             |
| 4     | DMF               | 29            |
| 5     | DMA               | 48            |
| 6     | DMSO              | 39            |
| 7     | water             | 46            |
| 8     | hexane            | 0             |
| 9     | toluene           | 0             |
| 10    | EtOAc             | 50            |
| 11    | CHCl <sub>3</sub> | 1             |
| 12    | DCM               | 6             |
| 13    | MeOH              | 2             |
| 14    | Et <sub>2</sub> O | 23            |
| 15    | MeCN              | 0             |
| 16    | Acetone           | 34            |

<sup>a</sup> <sup>1</sup>H NMR yields.

**Table S5. Screening of wavelength without amine**

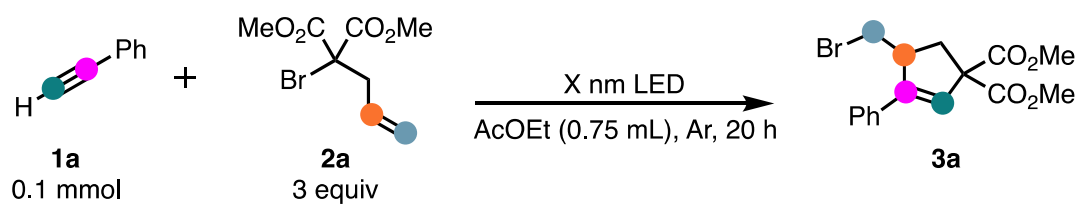

| entry | X (nm) | <b>3</b> (%) |
|-------|--------|--------------|
| 1     | 380    | 33           |
| 2     | 400    | trace        |
| 3     | 420    | no reaction  |
| 4     | 450    | no reaction  |
| 5     | 470    | no reaction  |
| 6     | 500    | no reaction  |

<sup>a</sup> <sup>1</sup>H NMR yields.

## 2. Substrate scope

**Table S6. Attempted alkynes for ATRA/ATRC reaction**

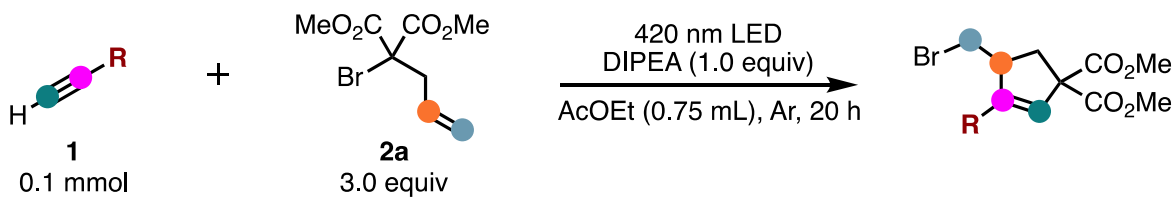

### Attempted substrates

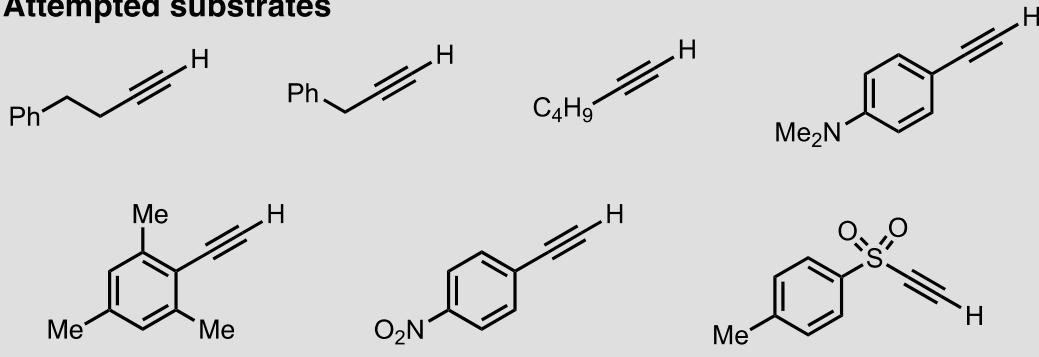

\* The reaction using these substrate did not proceed.

**Table S7. Attempted alkenes for ATRA/ATRC reaction**

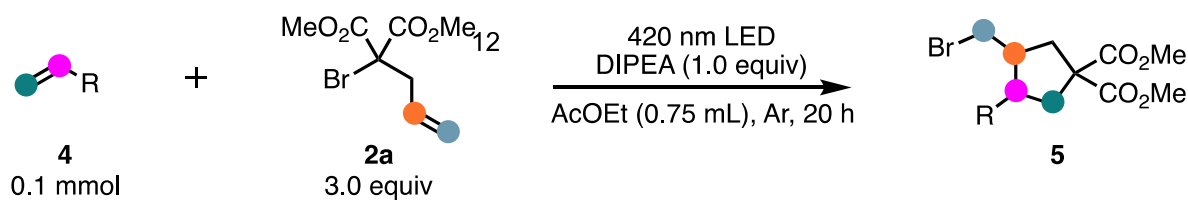

### Attempted substrates

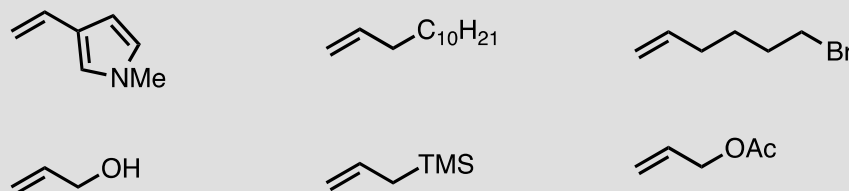

\* The reaction using these substrate did not proceed.

### 3. Radical trapping experiment

Another radical scavenging experiment was performed. When BHT (1.0 equiv) was added as a radical scavenger, the yield of the desired product (**3a**) was slightly reduced and a small amount of product (**7b**) with trapped malonic acid radical was obtained.

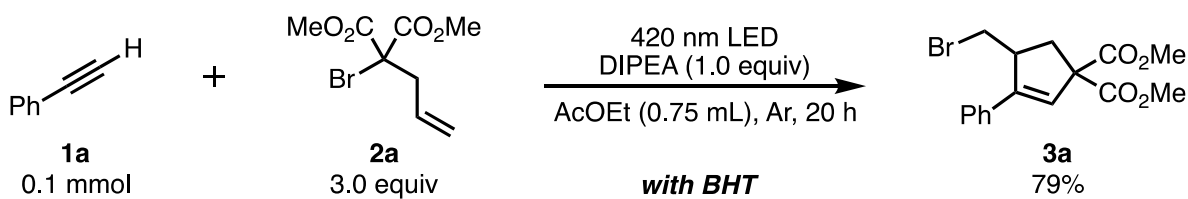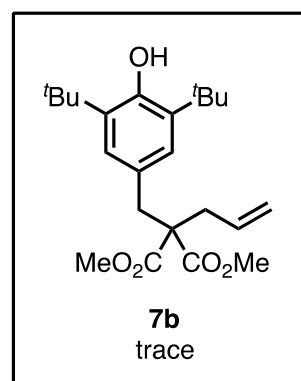

#### 4. Synthesis of cyclic compound 3

Dimethyl 4-(bromomethyl)-3-phenylcyclopent-2-ene-1,1-dicarboxylate (**3a**)

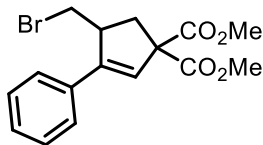

79 %, 28.0 mg (Colorless oil)

**TLC (SiO<sub>2</sub>)** R<sub>f</sub> = 0.40 (*n*-hexane : EtOAc = 4 : 1)

**<sup>1</sup>H NMR (500 MHz, CDCl<sub>3</sub>)**  $\delta$  7.42-7.32 (m, 5H), 6.19 (s, 1H), 3.80-3.75 (m, 7H), 3.59 (dd, *J* = 10.3, 2.9 Hz, 1H), 3.31 (dd, *J* = 10.3, 9.2 Hz, 1H), 2.93 (dd, *J* = 13.8, 8.0 Hz, 1H), 2.63 (dd, *J* = 13.8, 4.0 Hz, 1H).

**<sup>13</sup>C {<sup>1</sup>H} NMR (125 MHz, CDCl<sub>3</sub>)**  $\delta$  171.26, 171.20, 147.8, 133.7, 128.8, 128.5, 126.6, 125.8, 65.1, 53.0, 47.4, 36.7, 36.4.

**FTIR (ATR)** 2954, 2924, 2851, 1734, 1599, 1576, 1496, 1447, 1434, 1247, 1205, 1141, 1080, 1047, 1013, 947, 849, 766, 697 cm<sup>-1</sup>.

**HRMS m/z (DART)** calcd for C<sub>16</sub>H<sub>18</sub>BrO<sub>4</sub><sup>+</sup> (M+H)<sup>+</sup>, 353.0383; found, 353.0390.

Dimethyl 4-(bromomethyl)-3-(*p*-tolyl)cyclopent-2-ene-1,1-dicarboxylate (**3b**)<sup>[1]</sup>

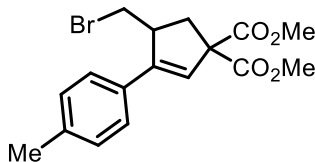

84 %, 31.0 mg (Colorless oil)

**TLC (SiO<sub>2</sub>)** R<sub>f</sub> = 0.40 (*n*-hexane : EtOAc = 4 : 1)

**<sup>1</sup>H NMR (500 MHz, CDCl<sub>3</sub>)**  $\delta$  7.30 (d, *J* = 8.0 Hz, 2H), 7.17 (d, *J* = 8.0 Hz, 2H), 6.14 (d, *J* = 1.1 Hz, 1H), 3.80-3.74 (m, 7H), 3.59 (dd, *J* = 10.3, 2.9 Hz, 1H), 3.30 (t, *J* = 9.7 Hz, 1H), 2.91 (dd, *J* = 13.8, 8.0 Hz, 1H), 2.64 (dd, *J* = 13.8, 4.0 Hz, 1H), 2.36 (s, 3H).

**<sup>13</sup>C {<sup>1</sup>H} NMR (125 MHz, CDCl<sub>3</sub>)**  $\delta$  171.4, 171.3, 147.7, 138.5, 130.8, 129.4, 126.5, 124.8, 65.0, 52.98, 52.95, 47.4, 36.7, 36.6, 21.2.

Dimethyl 4-(bromomethyl)-3-(*m*-tolyl)cyclopent-2-ene-1,1-dicarboxylate (**3c**)

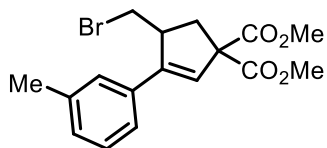

65 %, 23.8 mg (Colorless oil)

**TLC (SiO<sub>2</sub>)** R<sub>f</sub> = 0.40 (*n*-hexane : EtOAc = 4 : 1)

**<sup>1</sup>H NMR (500 MHz, CDCl<sub>3</sub>)** δ 7.27-7.22 (m, 2H), 7.19 (d, *J* = 7.5 Hz, 1H), 7.13 (d, *J* = 7.5 Hz, 1H), 6.16 (d, *J* = 1.2 Hz, 1H), 3.80-3.74 (m, 7H), 3.60 (dd, *J* = 10.3, 2.9 Hz, 1H), 3.30 (t, *J* = 9.7 Hz, 1H), 2.93 (dd, *J* = 13.8, 8.6 Hz, 1H), 2.63 (dd, *J* = 13.8, 4.0 Hz, 1H), 2.26 (s, 3H).

**<sup>13</sup>C {<sup>1</sup>H} NMR (125 MHz, CDCl<sub>3</sub>)** δ 171.3, 171.2, 147.9, 138.4, 133.7, 129.3, 128.6, 127.2, 125.6, 123.6, 65.0, 52.98, 52.95, 47.4, 36.7, 36.6, 21.4.

**FTIR (ATR)** 2954, 1735, 1435, 1251, 1141, 1081, 846, 788, 701 cm<sup>-1</sup>.

**HRMS m/z (DART)** calcd for C<sub>17</sub>H<sub>20</sub>BrO<sub>4</sub><sup>+</sup> (M+H)<sup>+</sup>, 367.0540 ; found, 367.0542.

Dimethyl 4-(bromomethyl)-3-(4-(*tert*-butyl)phenyl)cyclopent-2-ene-1,1-dicarboxylate (**3d**)

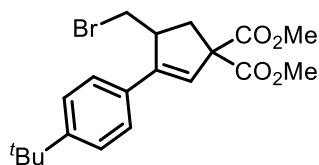

81 %, 33.1 mg (Colorless oil)

**TLC (SiO<sub>2</sub>)** R<sub>f</sub> = 0.40 (*n*-hexane : EtOAc = 4 : 1)

**<sup>1</sup>H NMR (500 MHz, CDCl<sub>3</sub>)** δ 7.39-7.33 (m, 4H), 6.15 (d, *J* = 1.1 Hz, 1H), 3.83-3.73 (m, 7H), 3.62 (dd, *J* = 10.3, 2.9 Hz, 1H), 3.30 (t, *J* = 9.7 Hz, 1H), 2.91 (dd, *J* = 13.8, 8.0 Hz, 1H), 2.63 (dd, *J* = 13.8, 4.0 Hz, 1H), 1.32 (s, 9H).

**<sup>13</sup>C {<sup>1</sup>H} NMR (125 MHz, CDCl<sub>3</sub>)** δ 171.4, 171.3, 151.7, 147.5, 130.8, 126.2, 125.7, 124.9, 65.0, 52.96, 52.92, 47.4, 36.71, 36.66, 34.6, 31.2.

**FTIR (ATR)** 3484, 2957, 2869, 1734, 1608, 1513, 1434, 1407, 1365, 1250, 1205, 1142, 1080, 1022, 948, 838, 744, 671 cm<sup>-1</sup>.

**HRMS m/z (DART)** calcd for C<sub>20</sub>H<sub>26</sub>BrO<sub>4</sub><sup>+</sup> (M+H)<sup>+</sup>, 409.1009; found, 409.1000.

Dimethyl 4-(bromomethyl)-3-(4-fluorophenyl)cyclopent-2-ene-1,1-dicarboxylate (**3e**)

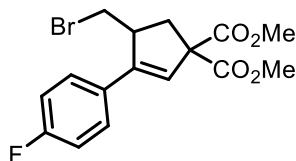

78 %, 28.8 mg (White solid)

**TLC (SiO<sub>2</sub>)** R<sub>f</sub> = 0.40 (*n*-hexane : EtOAc = 4 : 1)

**<sup>1</sup>H NMR (500 MHz, CDCl<sub>3</sub>)** δ 7.39-7.37 (m, 2H), 7.08-7.04 (m, 2H), 6.13 (s, 1H), 3.80-3.75 (m, 7H), 3.54 (d, *J* = 9.2 Hz, 1H), 3.30 (dd, *J* = 9.7, 9.2 Hz, 1H), 2.92 (dd, *J* = 14.3, 8.6 Hz, 1H), 2.63 (dd, *J* = 14.3, 3.4 Hz, 1H).

**<sup>13</sup>C {<sup>1</sup>H} NMR (125 MHz, CDCl<sub>3</sub>)** δ 171.2, 171.1, 162.7 (d, *J*<sub>C-F</sub> = 249.5 Hz), 146.7, 129.9, 128.3 (d, *J*<sub>C-F</sub> = 7.2 Hz), 125.7, 115.7 (d, *J*<sub>C-F</sub> = 21.6 Hz), 65.0, 53.0, 47.4, 36.7, 36.2.

**<sup>19</sup>F NMR (475 MHz, CDCl<sub>3</sub>)** δ -112.5.

**FTIR (ATR)** 3002, 2954, 2923, 2850, 2031, 1732, 1602, 1509, 1434, 1339, 1298, 1236, 1206, 1161, 1141, 1080, 1047, 1013, 947, 834, 756, 719, 667 cm<sup>-1</sup>.

**HRMS m/z (DART)** calcd for C<sub>16</sub>H<sub>17</sub>BrFO<sub>4</sub><sup>+</sup> (M+H)<sup>+</sup>, 371.0289; found, 371.0276.

**m.p.** 89.7-91.0 °C.

Dimethyl 4-(bromomethyl)-3-(4-chlorophenyl)cyclopent-2-ene-1,1-dicarboxylate (**3f**)

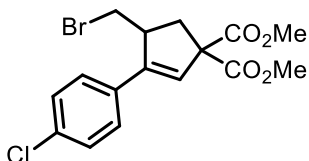

57 %, 22.1 mg (White solid)

**TLC (SiO<sub>2</sub>)** R<sub>f</sub> = 0.30 (*n*-hexane : EtOAc = 4 : 1)

**<sup>1</sup>H NMR (500 MHz, CDCl<sub>3</sub>)** δ 7.39-7.34 (m, 4H), 6.18 (d, *J* = 1.7 Hz, 1H), 3.80-3.74 (m, 7H), 3.53 (dd, *J* = 10.3, 2.9 Hz, 1H), 3.30 (dd, *J* = 10.3, 9.2 Hz, 1H), 2.90 (dd, *J* = 14.3, 8.6 Hz, 1H), 2.63 (dd, *J* = 14.3, 4.0 Hz, 1H).

**<sup>13</sup>C {<sup>1</sup>H} NMR (125 MHz, CDCl<sub>3</sub>)** δ 171.1, 171.0, 146.7, 134.3, 132.2, 128.9, 127.9, 126.4, 65.0, 53.0, 47.3, 36.6, 36.0.

**FTIR (ATR)** 3631, 3597, 3579, 3023, 2955, 2923, 2852, 1979, 1890, 1731, 1595, 1492, 1434, 1403, 1339, 1297, 1236, 1216, 1141, 1093, 1080, 1046, 1013, 973, 946, 929, 908, 894, 857, 826 cm<sup>-1</sup>.

**HRMS m/z (DART)** calcd for C<sub>16</sub>H<sub>17</sub>BrClO<sub>4</sub><sup>+</sup> (M+H)<sup>+</sup>, 386.9993; found, 387.0008.

**m.p.** 74.0-75.3 °C.

Dimethyl 4-(bromomethyl)-3-(3-chlorophenyl)cyclopent-2-ene-1,1-dicarboxylate (**3g**)

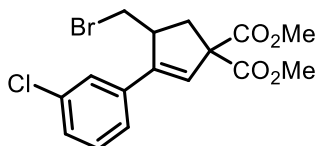

35 %, 13.7 mg (Colorless oil)

**TLC (SiO<sub>2</sub>)** R<sub>f</sub> = 0.40 (*n*-hexane : EtOAc = 4 : 1)

**<sup>1</sup>H NMR (500 MHz, CDCl<sub>3</sub>)** δ 7.39 (s, 1H), 7.30-7.26 (m, 3H), 6.20 (d, *J* = 1.7 Hz, 1H), 3.80-3.74 (m, 7H), 3.54 (dd, *J* = 10.3, 2.9 Hz, 1H), 3.31 (dd, *J* = 10.3, 9.2 Hz, 1H), 2.92 (dd, *J* = 14.3, 8.6 Hz, 1H), 2.63 (dd, *J* = 14.3, 4.6 Hz, 1H).

**<sup>13</sup>C {<sup>1</sup>H} NMR (125 MHz, CDCl<sub>3</sub>)** δ 171.0, 170.9, 146.6, 135.7, 134.7, 130.0, 128.5, 127.3, 126.7, 124.7, 65.1, 53.1, 47.2, 36.6, 36.0yo3.

**FTIR (ATR)** 2954, 2923, 2852, 1734, 1594, 1564, 1434, 1248, 1206, 1143, 1079, 1048, 1019, 948, 849, 788, 734, 695, 671 cm<sup>-1</sup>.

**HRMS m/z (DART)** calcd for C<sub>16</sub>H<sub>17</sub>BrClO<sub>4</sub><sup>+</sup> (M+H)<sup>+</sup>, 386.9993; found, 386.9985.

Dimethyl 4-(bromomethyl)-3-(2-chlorophenyl)cyclopent-2-ene-1,1-dicarboxylate (**3h**)

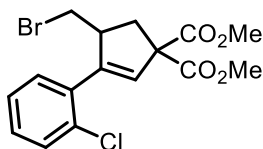

54 %, 20.9 mg (Colorless oil)

**TLC (SiO<sub>2</sub>)** R<sub>f</sub> = 0.30 (*n*-hexane : EtOAc = 4 : 1)

**<sup>1</sup>H NMR (500 MHz, CDCl<sub>3</sub>)** δ 7.39-7.25 (m, 4H), 6.07 (s, 1H), 4.02-3.99 (m, 1H), 3.81-3.76 (m, 6H), 3.40 (dd, *J* = 10.3, 2.9 Hz, 1H), 3.27 (dd, *J* = 9.7, 9.2 Hz, 1H), 2.98 (dd, *J* = 13.8, 8.0 Hz, 1H), 2.47 (dd, *J* = 13.8, 6.3 Hz, 1H).

**<sup>13</sup>C {<sup>1</sup>H} NMR (125 MHz, CDCl<sub>3</sub>)** δ 171.1, 170.8, 147.1, 133.7, 132.3, 131.0, 130.4, 129.9, 129.4, 126.8, 65.0, 53.0, 52.9, 48.1, 36.7, 36.3.

**FTIR (ATR)** 3020, 2874, 2401, 1732, 1436, 1215, 1141, 929, 852, 750, 669 cm<sup>-1</sup>.

**HRMS m/z (DART)** calcd for C<sub>16</sub>H<sub>17</sub>BrClO<sub>4</sub><sup>+</sup> (M+H)<sup>+</sup>, 386.9993; found, 386.9988.



Dimethyl 4-(bromomethyl)-3-(4-bromophenyl)cyclopent-2-ene-1,1-dicarboxylate (**3i**)<sup>[1]</sup>

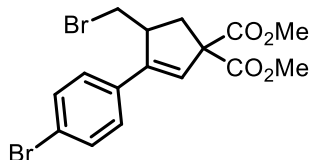

71 %, 30.7 mg (Colorless oil)

**TLC (SiO<sub>2</sub>)** R<sub>f</sub> = 0.40 (*n*-hexane : EtOAc = 4 : 1)

**<sup>1</sup>H NMR (500 MHz, CDCl<sub>3</sub>)** δ 7.49 (d, *J* = 8.0 Hz, 2H), 7.27 (d, *J* = 8.0 Hz, 2H), 6.19 (s, 1H), 3.80-3.73 (m, 7H), 3.53 (dd, *J* = 9.7, 2.9 Hz, 1H), 3.30 (t, *J* = 9.7 Hz, 1H), 2.92 (dd, *J* = 14.3, 8.6 Hz, 1H), 2.62 (dd, *J* = 14.3, 4.0 Hz, 1H).

**<sup>13</sup>C {<sup>1</sup>H} NMR (125 MHz, CDCl<sub>3</sub>)** δ 171.02, 170.99, 146.7, 132.7, 131.9, 128.2, 126.6, 122.5, 65.1, 53.0, 47.2, 36.6, 36.0.

Dimethyl 4-(bromomethyl)-3-(4-(trifluoromethyl)phenyl)cyclopent-2-ene-1,1-dicarboxylate (**3j**)

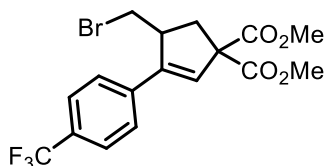

51 %, 21.3 mg (White solid)

**TLC (SiO<sub>2</sub>):** R<sub>f</sub> = 0.30 (*n*-hexane : EtOAc = 4 : 1)

**<sup>1</sup>H NMR (500 MHz, CDCl<sub>3</sub>)** δ 7.62 (d, *J* = 8.0 Hz, 2H), 7.51 (d, *J* = 8.0 Hz, 2H), 6.28 (s, 1H), 3.85-3.74 (m, 7H), 3.53 (dd, *J* = 10.3, 2.3 Hz, 1H), 3.32 (dd, *J* = 9.7, 9.2 Hz, 1H), 2.97 (dd, *J* = 14.3, 8.6 Hz, 1H), 2.64 (dd, *J* = 14.3, 4.0 Hz, 1H).

**<sup>13</sup>C {<sup>1</sup>H} NMR (125 MHz, CDCl<sub>3</sub>)** δ 170.89, 170.85, 146.6, 137.4, 130.4 (q, *J*<sub>C-F</sub> = 31.8 Hz), 128.2, 126.9, 125.7 (q, *J*<sub>C-F</sub> = 3.9 Hz), 123.9 (q, *J*<sub>C-F</sub> = 272.6 Hz), 65.1, 53.1, 47.2, 36.6, 35.8.

**<sup>19</sup>F NMR (475 MHz, CDCl<sub>3</sub>)** δ -62.6.

**FTIR (ATR)** 2956, 2923, 2851, 1735, 1617, 1575, 1435, 1412, 1326, 1250, 1207, 1167, 1125, 1082, 1067, 1016, 948, 839, 684 cm<sup>-1</sup>.

**HRMS *m/z* (DART)** calcd for C<sub>17</sub>H<sub>17</sub>BrF<sub>3</sub>O<sub>4</sub><sup>+</sup> (*M*+*H*)<sup>+</sup>, 421.0257; found, 421.0269.

***m.p.*** 82.0-84.0 °C.

Dimethyl 4-(bromomethyl)-3-(3,5-bis(trifluoromethyl)phenyl)cyclopent-2-ene-1,1-dicarboxylate (**3k**)

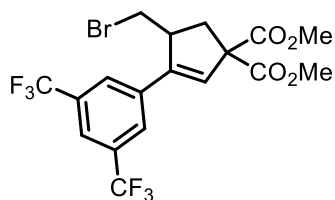

31 %, 15.4 mg (Colorless oil)

**TLC (SiO<sub>2</sub>):** R<sub>f</sub> = 0.40 (*n*-hexane : EtOAc = 4 : 1)

**<sup>1</sup>H NMR (500 MHz, CDCl<sub>3</sub>)** δ 7.83 (s, 1H), 7.81 (s, 2H), 6.34 (d, *J* = 1.7 Hz, 1H), 3.86-3.77 (m, 7H), 3.50 (dd, *J* = 10.3, 2.9 Hz, 1H), 3.35 (dd, *J* = 10.3, 9.5 Hz, 1H), 2.98 (dd, *J* = 14.3, 8.6 Hz, 1H), 2.66 (dd, *J* = 14.3, 5.2 Hz, 1H).

**<sup>13</sup>C {<sup>1</sup>H} NMR (125 MHz, CDCl<sub>3</sub>)** δ 170.6, 145.4, 136.2, 132.2 (q, *J*<sub>C-F</sub> = 31.8 Hz), 130.0, 126.6, 123.1 (q, *J*<sub>C-F</sub> = 272.6 Hz), 122.1 (m), 65.2, 53.2, 47.0, 36.5, 35.3.

**<sup>19</sup>F NMR (475 MHz, CDCl<sub>3</sub>)** δ -62.8.

**FTIR (ATR)** 2930, 2255, 2020, 1734, 1436, 1384, 1280, 1184, 1143, 1088, 904, 846, 805, 726, 683 cm<sup>-1</sup>.

**HRMS *m/z* (DART)** calcd for C<sub>18</sub>H<sub>16</sub>BrF<sub>6</sub>O<sub>4</sub><sup>+</sup> (M+H)<sup>+</sup>, 489.0131; found, 489.0148.

Dimethyl 4-(bromomethyl)-3-(4-cyanophenyl)cyclopent-2-ene-1,1-dicarboxylate (**3l**)

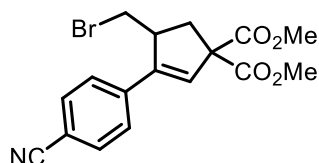

34 %, 13.0 mg (Colorless oil)

**TLC (SiO<sub>2</sub>):** R<sub>f</sub> = 0.10 (*n*-hexane : EtOAc = 4 : 1)

**<sup>1</sup>H NMR (500 MHz, CDCl<sub>3</sub>)** δ 7.67 (d, *J* = 8.0 Hz, 2H), 7.50 (d, *J* = 8.0 Hz, 2H), 6.31 (d, *J* = 1.7 Hz, 1H), 3.81-3.76 (m, 7H), 3.51 (dd, *J* = 10.3, 2.9 Hz, 1H), 3.32 (dd, *J* = 10.9, 8.6 Hz, 1H), 2.95 (dd, *J* = 14.3, 8.6 Hz, 1H), 2.64 (dd, *J* = 14.3, 4.6 Hz, 1H).

**<sup>13</sup>C {<sup>1</sup>H} NMR (125 MHz, CDCl<sub>3</sub>)** δ 170.7, 146.3, 138.4, 132.6, 129.4, 127.2, 118.5, 112.0, 65.2, 53.2, 47.0, 36.5, 35.6.

**FTIR (ATR)** 2956, 2229, 1734, 1607, 1435, 1368, 1248, 1144, 1081, 838 cm<sup>-1</sup>.

**HRMS *m/z* (DART)** calcd for C<sub>17</sub>H<sub>17</sub>BrNO<sub>4</sub><sup>+</sup> (M+H)<sup>+</sup>, 378.0335; found, 378.0321.

Dimethyl 3-(4-acetylphenyl)-4-(bromomethyl)-cyclopent-2-ene-1,1-dicarboxylate (**3m**)

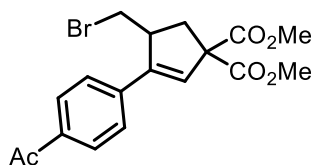

65 %, 25.5 mg (White solid)

**TLC (SiO<sub>2</sub>):** R<sub>f</sub> = 0.10 (*n*-hexane : EtOAc = 4 : 1)

**<sup>1</sup>H NMR (500 MHz, CDCl<sub>3</sub>)** δ 7.96 (d, *J* = 8.6 Hz, 2H), 7.50 (d, *J* = 8.6 Hz, 2H), 6.30 (d, *J* = 1.2 Hz, 1H), 3.81-3.74 (m, 7H), 3.54 (dd, *J* = 10.3, 2.9 Hz, 1H), 3.33 (dd, *J* = 10.3, 9.2 Hz, 1H), 2.95 (dd, *J* = 14.3, 8.6 Hz, 1H), 2.63 (dd, *J* = 14.3, 4.6 Hz, 1H), 2.61 (s, 3H).

**<sup>13</sup>C {<sup>1</sup>H} NMR (125 MHz, CDCl<sub>3</sub>)** δ 197.4, 170.9, 170.8, 146.9, 138.4, 136.8, 128.8, 128.4, 126.7, 65.2, 53.1, 47.2, 36.6, 36.0, 26.6.

**FTIR (ATR)** 3003, 2955, 2923, 2852, 1733, 1682, 1604, 1561, 1434, 1407, 1359, 1258, 1206, 1143, 1074, 1048, 1014, 958, 834, 720, 668 cm<sup>-1</sup>.

**HRMS m/z (DART)** calcd for C<sub>18</sub>H<sub>20</sub>BrO<sub>5</sub><sup>+</sup> (M+H)<sup>+</sup>, 395.0489; found, 395.0507.

**m.p.** 116.0-118.7 °C.

Dimethyl 4-(bromomethyl)-3-(4-(methoxycarbonyl)phenyl)cyclopent-2-ene-1,1-dicarboxylate (**3n**)

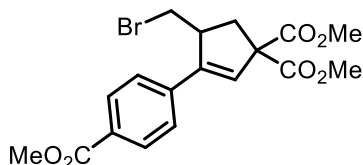

56 %, 23.2 mg (Colorless oil)

**TLC (SiO<sub>2</sub>)** R<sub>f</sub> = 0.20 (*n*-hexane : EtOAc = 4 : 1)

**<sup>1</sup>H NMR (500 MHz, CDCl<sub>3</sub>)** δ 8.03 (d, *J* = 8.0 Hz, 2H), 7.47 (d, *J* = 8.0 Hz, 2H), 6.30 (d, *J* = 1.7 Hz, 1H), 3.93 (s, 3H), 3.85-3.73 (m, 7H), 3.55 (dd, *J* = 10.3, 2.9 Hz, 1H), 3.32 (dd, *J* = 10.3, 9.2 Hz, 1H), 2.94 (dd, *J* = 14.3, 8.6 Hz, 1H), 2.64 (dd, *J* = 14.3, 4.6 Hz, 1H).

**<sup>13</sup>C {<sup>1</sup>H} NMR (125 MHz, CDCl<sub>3</sub>)** δ 170.91, 170.89, 166.5, 147.0, 138.2, 130.0, 129.9, 128.0, 126.5, 65.2, 53.1, 52.2, 47.2, 36.6, 36.0.

**FTIR (ATR)** 3001, 2954, 2848, 1935, 1725, 1609, 1567, 1434, 1409, 1279, 1253, 1206, 1191, 1142, 1110, 1080, 1048, 1017, 966, 948, 847, 827, 774, 707, 666 cm<sup>-1</sup>.

**HRMS m/z (DART)** calcd for C<sub>18</sub>H<sub>20</sub>BrO<sub>6</sub><sup>+</sup> (M+H)<sup>+</sup>, 411.0438; found, 411.0455.

Dimethyl 3-(4-(acetamide)phenyl)-4-(bromomethyl)-cyclopent-2-ene-1,1-dicarboxylate (**3o**)

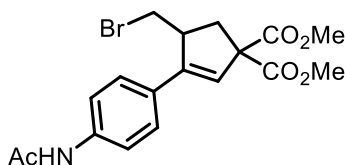

88 %, 36.0 mg (Colorless oil)

**TLC (SiO<sub>2</sub>)** R<sub>f</sub> = 0.20 (*n*-hexane : EtOAc = 1 : 1)

**<sup>1</sup>H NMR (500 MHz, CDCl<sub>3</sub>)** δ 7.74 (brs, 1H), 7.53 (d, *J* = 8.6 Hz, 2H), 7.33 (d, *J* = 8.6 Hz, 2H), 6.12 (d, *J* = 1.2 Hz, 1H), 3.80-3.73 (m, 7H), 3.55 (dd, *J* = 10.3, 2.9 Hz, 1H), 3.30 (dd, *J* = 9.7, 9.2 Hz, 1H), 2.89 (dd, *J* = 14.3, 8.6 Hz, 1H), 2.65 (dd, *J* = 14.3, 4.6 Hz, 1H), 2.19 (s, 3H).

**<sup>13</sup>C {<sup>1</sup>H} NMR (125 MHz, CDCl<sub>3</sub>)** δ 171.3, 168.5, 147.1, 138.2, 129.4, 127.2, 124.8, 119.8, 65.1, 53.0, 47.3, 36.6, 36.4, 36.4, 24.5.

**FTIR (ATR)** 3308, 3182, 3108, 3014, 2956, 2848, 2433, 2028, 1729, 1673, 1595, 1520, 1434, 1408, 1371, 1318, 1296, 1253, 1217, 1142, 1080, 1045, 1010, 965, 947, 833, 753, 667 cm<sup>-1</sup>.

**HRMS m/z (DART)** calcd for C<sub>18</sub>H<sub>21</sub>BrNO<sub>5</sub><sup>+</sup> (M+H)<sup>+</sup>, 410.0598 ; found, 410.0578.

Dimethyl 3-(4-(*N*-*tert*-butoxycarbonyl)aminophenyl)-4-(bromomethyl)-cyclopent-2-ene-1,1-dicarboxylate (**3p**)

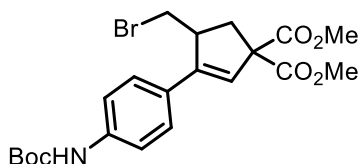

91 %, 42.8 mg (White solid)

**TLC (SiO<sub>2</sub>)** R<sub>f</sub> = 0.20 (*n*-hexane : EtOAc = 4 : 1)

**<sup>1</sup>H NMR (500 MHz, CDCl<sub>3</sub>)** δ 7.38-7.32 (m, 4H), 6.57 (brs, 1H), 6.11 (d, *J* = 1.7 Hz, 1H), 3.79-3.73 (m, 7H), 3.57 (dd, *J* = 10.3, 2.9 Hz, 1H), 3.30 (t, *J* = 9.7 Hz, 1H), 2.88 (dd, *J* = 14.3, 8.6 Hz, 1H), 2.64 (dd, *J* = 13.8, 4.0 Hz, 1H), 1.52 (s, 9H).

**<sup>13</sup>C {<sup>1</sup>H} NMR (125 MHz, CDCl<sub>3</sub>)** δ 171.4, 171.3, 152.5, 147.1, 138.6, 128.3, 127.3, 124.4, 118.4, 80.8, 65.0, 53.0, 47.4, 36.6, 36.5, 28.3.

**FTIR (ATR)** 3436, 3020, 2957, 2929, 2401, 1729, 1611, 1586, 1520, 1502, 1435, 1410, 1317, 1215, 1156, 1082, 1053, 1028, 929, 903, 834, 749, 668 cm<sup>-1</sup>.

**HRMS m/z (DART):** calcd for C<sub>21</sub>H<sub>27</sub>BrNO<sub>6</sub><sup>+</sup> (M+H)<sup>+</sup>, 468.1017 ; found, 468.1001.

**m.p.** 52.7-55.7 °C.

Dimethyl-3-[(1,1'-biphenyl)-4-yl]4-(bromomethyl)-cyclopent-2-ene-1,1-dicarboxylate (**3q**)

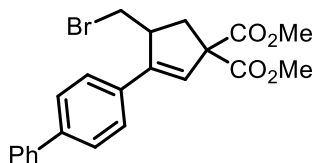

70 %, 30.0 mg (White solid)

**TLC (SiO<sub>2</sub>)** R<sub>f</sub> = 0.40 (*n*-hexane : EtOAc = 4 : 1)

**<sup>1</sup>H NMR (500 MHz, CDCl<sub>3</sub>)** δ 7.60-7.59 (m, 4H), 7.49-7.43 (m, 4H), 7.36 (t, *J* = 13.8 Hz, 1H), 6.24 (s, 1H), 3.81-3.75 (m, 7H), 3.63 (d, *J* = 9.2 Hz, 1H), 3.35 (dd, *J* = 9.7, 9.2 Hz, 1H), 2.94 (dd, *J* = 13.8, 8.6 Hz, 1H), 2.66 (dd, *J* = 14.3, 4.0 Hz, 1H).

**<sup>13</sup>C {<sup>1</sup>H} NMR (125 MHz, CDCl<sub>3</sub>)**: δ 171.25, 171.17, 147.3, 141.3, 140.3, 132.6, 128.8, 127.5, 127.4, 126.97, 126.95, 125.8, 65.1, 53.0, 47.4, 36.7, 36.4.

**FTIR (ATR)**: 3030, 2953, 2924, 2853, 1732, 1599, 1580, 1510, 1488, 1433, 1405, 1339, 1300, 1247, 1205, 1141, 1080, 1046, 1007, 970, 836, 767, 731, 698, 670 cm<sup>-1</sup>.

**HRMS *m/z* (DART)**: calcd for C<sub>22</sub>H<sub>22</sub>BrO<sub>4</sub><sup>+</sup> (*M*+H)<sup>+</sup>, 429.0696; found, 429.0714.

**m.p.** 205.3-210.0 °C.

Dimethyl 4-(bromomethyl)-3-(naphthalen-2-yl)cyclopent-2-ene-1,1-dicarboxylate (**3r**)

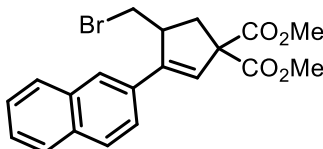

64 %, 25.9 mg (White solid)

**TLC (SiO<sub>2</sub>)** R<sub>f</sub> = 0.20 (*n*-hexane : EtOAc = 4 : 1)

**<sup>1</sup>H NMR (500 MHz, CDCl<sub>3</sub>)** δ 7.85-7.80 (m, 4H), 7.57 (dd, *J* = 6.9, 1.7 Hz, 1H), 7.50-7.48 (m, 2H), 6.32 (d, *J* = 1.2 Hz, 1H), 3.94-3.88 (m, 1H), 3.82 (s, 3H), 3.76 (s, 3H), 3.66 (dd, *J* = 10.3, 2.9 Hz, 1H), 3.38 (t, *J* = 9.7 Hz, 1H), 2.96 (dd, *J* = 13.8, 8.0 Hz, 1H), 2.70 (dd, *J* = 14.3, 4.0 Hz, 1H).

**<sup>13</sup>C {<sup>1</sup>H} NMR (125 MHz, CDCl<sub>3</sub>)** δ 171.3, 171.2, 147.7, 133.25, 133.19, 131.1, 128.5, 128.2, 127.7, 126.6, 126.5, 126.3, 125.6, 124.5, 65.2, 53.05, 53.01, 47.5, 36.7, 36.5.

**FTIR (ATR)** 3650, 3021, 2954, 2925, 2852, 2345, 1731, 1626, 1597, 1504, 1434, 1356, 1249, 1216, 1140, 1078, 1046, 1020, 948, 930, 897, 845, 819, 751, 684, 688 cm<sup>-1</sup>.

**HRMS *m/z* (DART)** calcd for C<sub>20</sub>H<sub>20</sub>BrO<sub>4</sub><sup>+</sup> (*M*+H)<sup>+</sup>, 403.0539; found, 403.0535.

**m.p.** 92.3-94.3 °C.

Dimethyl 4-(bromomethyl)-3-((6-methoxy)naphthalen-2-yl)cyclopent-2-ene-1,1-dicarboxylate (**3s**)

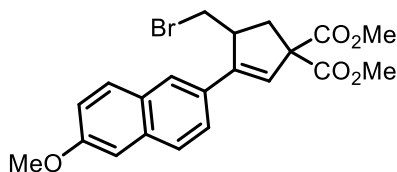

50 %, 21.5 mg (White solid)

**TLC (SiO<sub>2</sub>)** R<sub>f</sub> = 0.10 (*n*-hexane : EtOAc = 4 : 1)

**<sup>1</sup>H NMR (500 MHz, CDCl<sub>3</sub>)** δ 7.74-7.71 (m, 3H), 7.53 (dd, *J* = 6.9, 1.7 Hz, 1H), 7.16 (dd, *J* = 6.3, 2.3 Hz, 1H), 7.12 (d, *J* = 2.3 Hz, 1H), 6.27 (d, *J* = 1.7 Hz, 1H), 3.93 (s, 3H), 3.93-3.87 (m, 1H), 3.82 (s, 3H), 3.76 (s, 3H), 3.66 (dd, *J* = 10.3, 3.4 Hz, 1H), 3.37 (dd, *J* = 10.3, 9.7 Hz, 1H), 2.96 (dd, *J* = 14.3, 8.6 Hz, 1H), 2.70 (dd, *J* = 14.3, 4.0 Hz, 1H).

**<sup>13</sup>C {<sup>1</sup>H} NMR (125 MHz, CDCl<sub>3</sub>)** δ 171.4, 171.3, 158.2, 147.7, 134.4, 129.7, 128.9, 128.6, 127.3, 125.4, 125.2, 125.0, 119.3, 105.7, 65.1, 55.3, 53.02, 52.97, 47.5, 36.7, 36.6.

**FTIR (ATR)** 3003, 2954, 2849, 1918, 1732, 1629, 1601, 1506, 1485, 1434, 1391, 1346, 1235, 1201, 1165, 1140, 1124, 1079, 1032, 947, 895, 848, 809, 756, 721, 699, 653 cm<sup>-1</sup>.

**HRMS *m/z* (DART)** calcd for C<sub>21</sub>H<sub>22</sub>BrO<sub>5</sub><sup>+</sup> (*M*+H)<sup>+</sup>, 433.0645; found, 433.0667.

***m.p.*** 139.7-141.7 °C.

Dimethyl 4-(bromomethyl)-3-(pyridine-3-yl)cyclopent-2-ene-1,1-dicarboxylate (**3t**)

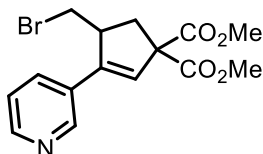

68 %, 24.1 mg (Colorless oil)

**TLC (SiO<sub>2</sub>)** R<sub>f</sub> = 0.20 (*n*-hexane : EtOAc = 4 : 1)

**<sup>1</sup>H NMR (500 MHz, CDCl<sub>3</sub>)** δ 8.67 (s, 1H), 8.57 (s, 1H), 7.71 (d, *J* = 8.0 Hz, 1H), 7.32 (brs, 1H), 6.27 (d, *J* = 1.8 Hz, 1H), 3.81-3.74 (m, 7H), 3.54 (dd, *J* = 10.3, 2.9 Hz, 1H), 3.34 (dd, *J* = 10.3, 8.0 Hz, 1H), 2.94 (dd, *J* = 14.3, 8.6 Hz, 1H), 2.65 (dd, *J* = 14.3, 4.6 Hz, 1H).

**<sup>13</sup>C {<sup>1</sup>H} NMR (125 MHz, CDCl<sub>3</sub>)** δ 170.8, 149.5, 147.7, 144.8, 133.9, 129.7, 127.9, 123.6, 65.2, 53.1, 47.1, 36.5, 35.7.

**FTIR (ATR)** 3004, 2954, 2921, 2850, 1958, 1730, 1587, 1568, 1475, 1434, 1415, 1248, 1142, 1083, 1047, 1025, 1013, 969, 946, 852, 809, 756, 711, 666 cm<sup>-1</sup>.

**HRMS *m/z* (DART)** calcd for C<sub>15</sub>H<sub>17</sub>BrNO<sub>4</sub><sup>+</sup> (*M*+H)<sup>+</sup>, 354.0335; found, 354.0331.

Dimethyl 4-(bromomethyl)-3-(thiophen-3-yl)cyclopent-2-ene-1,1-dicarboxylate (**3u**)<sup>[1]</sup>

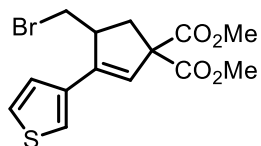

64 %, 22.8 mg (Colorless oil)

**TLC (SiO<sub>2</sub>)** R<sub>f</sub> = 0.40 (*n*-hexane : EtOAc = 4 : 1)

**<sup>1</sup>H NMR (500 MHz, CDCl<sub>3</sub>)**  $\delta$  7.32 (dd, *J* = 2.9, 2.3 Hz, 1H), 7.26 (s, 1H), 7.22-7.21 (m, 1H), 6.12 (d, *J* = 1.2 Hz, 1H), 3.79 (s, 3H), 3.75 (s, 3H), 3.68-3.64 (m, 2H), 3.36 (t, *J* = 9.7 Hz, 1H), 2.84 (dd, *J* = 14.3, 9.2 Hz, 1H), 2.68 (dd, *J* = 14.3, 3.4 Hz, 1H).

**<sup>13</sup>C {<sup>1</sup>H} NMR (125 MHz, CDCl<sub>3</sub>)**  $\delta$  171.3, 171.2, 142.6, 135.4, 126.4, 126.2, 124.8, 122.4, 65.0, 53.01, 52.98, 48.5, 36.7, 36.5.

## 5. Synthesis of cyclic compounds 5

Dimethyl 4-(bromomethyl)-3-(*p*-tolyl)-1,1-cyclopentanedicarboxylate (**5a**)

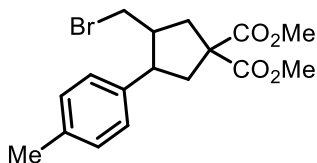

47 %, 17.3 mg, 59 : 41 d.r. (Colorless oil)

**TLC (SiO<sub>2</sub>)** R<sub>f</sub> = 0.40 (*n*-hexane : EtOAc = 4 : 1)

**<sup>1</sup>H NMR (500 MHz, CDCl<sub>3</sub>)** δ 7.13-7.06 (m, 4H), 3.80-3.77 (m, 6H), 3.49-3.39 (m, 1H), 3.21 (dd, *J* = 10.4, 7.5 Hz, 0.41H), 2.95-2.86 (m, 1.50H), 2.78-2.70 (m, 2.49H), 2.58 (dd, *J* = 13.8, 10.9 Hz, 0.56H), 2.40-2.32 (m, 4.43H), 2.24 (dd, *J* = 13.8, 10.9 Hz, 0.41H).

**<sup>13</sup>C {<sup>1</sup>H} NMR (125 MHz, CDCl<sub>3</sub>)** δ 172.86, 172.71, 172.66, 172.58, 137.5, 136.7, 136.5, 136.1, 129.4, 129.2, 128.0, 127.3, 58.6, 57.6, 53.09, 52.96, 52.93, 52.92, 49.0, 48.4, 46.7, 45.6, 42.4, 38.93, 38.87, 38.1, 35.6, 35.5, 21.01, 20.97.

**FTIR (ATR)** 2953, 1905, 1730, 1516, 1434, 1350, 1252, 1197, 1164, 1095, 1067, 1027, 1005, 936, 865, 844, 812, 759, 720, 699, 674 cm<sup>-1</sup>.

**HRMS *m/z* (DART)** calcd for C<sub>17</sub>H<sub>22</sub>BrO<sub>4</sub><sup>+</sup> (*M*+*H*)<sup>+</sup>, 369.0696; found, 369.0698.

Dimethyl 4-(bromomethyl)-3-(*m*-tolyl)-1,1-cyclopentanedicarboxylate (**5b**)

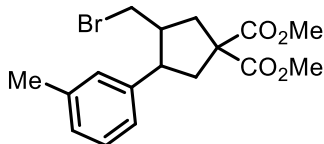

33 %, 12.0 mg, 74 : 26 d.r. (Colorless oil)

**TLC (SiO<sub>2</sub>)** R<sub>f</sub> = 0.40 (*n*-hexane : EtOAc = 4 : 1)

**<sup>1</sup>H NMR (500 MHz, CDCl<sub>3</sub>)** δ 7.23-7.19 (m, 1H), 7.06-6.99 (m, 3H), 3.79-3.77 (m, 6 H), 3.47-3.40 (m, 1H), 3.22 (dd, *J* = 10.3, 7.5 Hz, 0.74H), 2.95-2.85 (m, 1H), 2.81-2.71 (m, 2H), 2.63-2.59 (m, 0.22H), 2.45-2.18 (m, 6H).

**<sup>13</sup>C {<sup>1</sup>H} NMR (125 MHz, CDCl<sub>3</sub>)** δ 172.85, 172.75, 172.65, 172.59, 140.5, 139.1, 138.4, 138.1, 128.9, 128.6, 128.4, 128.2, 127.8, 127.6, 125.1, 124.5, 58.5, 57.6, 52.9 (4C), 49.4, 48.4, 47.1, 45.5, 42.4, 38.91, 38.85, 37.8, 35.6, 35.5, 21.44, 21.36.

**FTIR (ATR)** 2953, 2924, 2853, 1733, 1607, 1589, 1491, 1435, 1259, 1200, 1163, 1096, 937, 866, 786, 704 cm<sup>-1</sup>.

**HRMS *m/z* (DART)** calcd for C<sub>17</sub>H<sub>22</sub>BrO<sub>4</sub><sup>+</sup> (*M*+*H*)<sup>+</sup>, 369.0696; found, 369.0698.



Dimethyl 4-(bromomethyl)-3-(*o*-tolyl)-1,1-cyclopentanedicarboxylate (**5c**)

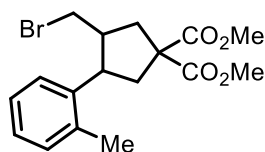

40 %, 14.7 mg, 62 : 38 d.r. (Colorless oil)

**TLC (SiO<sub>2</sub>)** R<sub>f</sub> = 0.40 (*n*-hexane : EtOAc = 4 : 1)

**<sup>1</sup>H NMR (500 MHz, CDCl<sub>3</sub>)** δ 7.24-7.11 (m, 4H), 3.80-3.76 (m, 6H), 3.56-3.53 (m, 0.60H), 3.45-3.42 (m, 0.34H), 3.25-3.21 (m, 0.63H), 2.91-2.58 (m, 5H), 2.37-2.32 (m, 3.60H), 2.24-2.14 (m, 0.61H).

**<sup>13</sup>C {<sup>1</sup>H} NMR (125 MHz, CDCl<sub>3</sub>)** δ 172.8, 172.7, 172.6, 172.5, 138.8, 136.8, 136.7, 136.5, 130.7 (2C), 130.5, 126.8, 126.6, 126.5, 126.0, 125.4, 58.2, 53.0, 52.9, 47.4, 44.5, 43.6, 42.6, 42.4, 39.1, 38.8, 37.6, 36.4, 35.5, 19.9, 19.8.

**FTIR (ATR)** 3021, 2953, 2924, 2850, 1918, 1730, 1604, 1492, 1458, 1434, 1380, 1257, 1198, 1170, 1122, 1095, 1048, 1031, 1004, 938, 865, 946, 820, 903, 758, 727, 705, 676 cm<sup>-1</sup>.

**HRMS m/z (DART)** calcd for C<sub>17</sub>H<sub>22</sub>BrO<sub>4</sub><sup>+</sup> (M+H)<sup>+</sup>, 369.0696; found, 369.0705.

Dimethyl 4-(bromomethyl)-3-(4-(*tert*-butyl)phenyl)-1,1-cyclopentanedicarboxylate (**5d**)

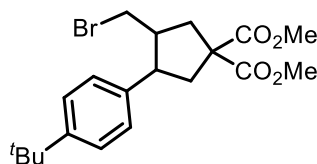

46 %, 18.9 mg, 56 : 44 d.r. (Colorless oil)

**TLC (SiO<sub>2</sub>):** R<sub>f</sub> = 0.40 (*n*-hexane : EtOAc = 4 : 1)

**<sup>1</sup>H NMR (500 MHz, CDCl<sub>3</sub>)** δ 7.34-7.32 (m, 2H), 7.16 (d, *J* = 8.0 Hz, 1.1H), 7.11 (d, *J* = 8.6 Hz, 0.9H), 3.79-3.73 (m, 6H), 3.46-3.41 (m, 1H), 3.22 (dd, *J* = 10.5, 7.5 Hz, 0.41H), 2.97-2.68 (m, 4H), 2.61 (dd, *J* = 13.8, 10.9 Hz, 0.51H), 2.41-2.36 (m, 1.45H), 2.24 (dd, *J* = 13.8, 10.9 Hz, 0.43H), 1.30 (s, 9H).

**<sup>13</sup>C {<sup>1</sup>H} NMR (125 MHz, CDCl<sub>3</sub>)** δ 172.9, 172.72, 172.67, 172.6, 149.9, 149.7, 137.4, 136.1, 127.8, 127.1, 125.6, 125.4, 58.6, 57.6, 53.0, 52.9, 52.8, 48.9, 48.4, 46.7, 45.6, 42.3, 39.0, 38.8, 38.0, 35.7, 35.6, 34.4, 31.3. \* Carbon signal of *t*Bu was overlapped with each diastereomers.

**FTIR (ATR)** 2955, 2905, 2869, 1910, 1731, 1511, 1458, 1434, 1394, 1363, 1254, 1199, 1165, 1096, 1067, 1023, 937, 866, 832, 802, 761, 745, 703, 680 cm<sup>-1</sup>.

**HRMS m/z (DART)** calcd for C<sub>20</sub>H<sub>28</sub>BrO<sub>4</sub><sup>+</sup> (M+H)<sup>+</sup>, 411.1165; found, 411.1168.

Dimethyl 4-(bromomethyl)-3-(4-methoxyphenyl)-1,1-cyclopentanedicarboxylate (**5e**)

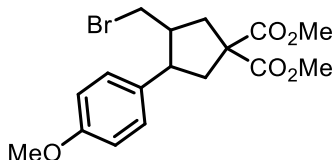

Quant, 38.5 mg, 63 : 37 d.r. (Colorless oil)

**TLC (SiO<sub>2</sub>)** R<sub>f</sub> = 0.20 (*n*-hexane : EtOAc = 4 : 1)

**<sup>1</sup>H NMR (500 MHz, CDCl<sub>3</sub>)** δ 7.17-7.10 (m, 2H), 6.87-6.84 (m, 2H), 3.83-3.75 (m, 9H), 3.45-3.40 (m, 1H), 3.21 (dd, *J* = 10.3, 7.5 Hz, 0.36H), 2.94-2.66 (m, 4H), 2.57 (dd, *J* = 13.8, 10.3 Hz, 0.59H), 2.38-2.33 (m, 1.32H), 2.23 (dd, *J* = 13.8, 10.9 Hz, 0.37H).

**<sup>13</sup>C {<sup>1</sup>H} NMR (125 MHz, CDCl<sub>3</sub>)** δ 172.9, 172.70, 172.65, 172.59, 158.6, 158.4, 132.5, 131.2, 129.1, 128.4, 114.1, 113.9, 58.6, 57.5, 55.2, 53.00, 52.97, 52.93, 52.91, 48.6, 48.5, 46.3, 45.7, 42.4, 38.8, 38.2, 35.6, 35.4.

**FTIR (ATR)** 3000, 2954, 2927, 2840, 1731, 1612, 1583, 1515, 1435, 1351, 1249, 1199, 1180, 1167, 1096, 166, 1035, 938, 866, 832, 809, 757 cm<sup>-1</sup>.

**HRMS m/z (DART)** calcd for C<sub>17</sub>H<sub>22</sub>BrO<sub>5</sub><sup>+</sup> (M+H)<sup>+</sup>, 385.0645; found, 385.0652.

Dimethyl 4-(bromomethyl)-3-(4-fluorophenyl)-1,1-cyclopentanedicarboxylate (**5f**)

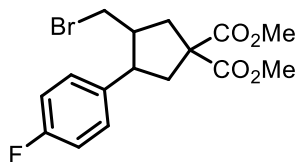

52 %, 19.5 mg, 58 : 42 d.r. (Colorless oil)

**TLC (SiO<sub>2</sub>)** R<sub>f</sub> = 0.40 (*n*-hexane : EtOAc = 4 : 1)

**<sup>1</sup>H NMR (500 MHz, CDCl<sub>3</sub>)** δ 7.22-7.15 (m, 2H), 7.03-6.97 (m, 2H), 3.81-3.73 (m, 6H), 3.47 (ddd, *J* = 10.3, 8.0, 7.5 Hz, 0.58H), 3.40 (dd, *J* = 10.3, 3.4 Hz, 0.42H), 3.20 (dd, *J* = 10.3, 6.9 Hz, 0.42H), 2.96-2.868 (m, 4H), 2.57 (dd, *J* = 13.8, 10.3 Hz, 0.60H), 2.38-2.23 (m, 1.83H).

**<sup>13</sup>C {<sup>1</sup>H} NMR (125 MHz, CDCl<sub>3</sub>)** δ 172.8, 172.6, 172.50, 172.47, 161.8 (d, *J*<sub>C-F</sub> = 245.6 Hz), 161.7 (d, *J*<sub>C-F</sub> = 245.6 Hz), 136.3, 135.0, 129.6 (d, *J*<sub>C-F</sub> = 7.7 Hz), 128.9 (d, *J*<sub>C-F</sub> = 6.7 Hz), 115.6 (d, *J*<sub>C-F</sub> = 22.2 Hz), 115.4 (d, *J*<sub>C-F</sub> = 22.2 Hz), 58.5, 57.5, 53.1, 53.0, 52.9, 52.8, 48.52, 48.46, 46.3, 45.6, 42.3, 38.8, 38.2, 35.2, 34.8. \* One carbon signal was overlapped.

**<sup>19</sup>F NMR (475 MHz, CDCl<sub>3</sub>)**: δ -115.7.

**FTIR (ATR)**: 2955, 2851, 1731, 1606, 1512, 1435, 1261, 1226, 1200, 1162, 1094, 1067, 1027, 1016, 939, 866, 837, 817, 762 cm<sup>-1</sup>.

**HRMS m/z (DART)**: calcd for C<sub>16</sub>H<sub>19</sub>BrFO<sub>4</sub><sup>+</sup> (M+H)<sup>+</sup>, 373.0445; found, 373.0445.

Dimethyl 4-(bromomethyl)-3-(4-chlorophenyl)-1,1-cyclopentanedicarboxylate (**5g**)

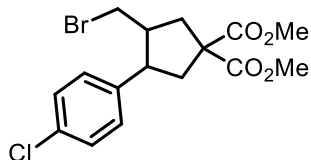

29 %, 11.3 mg, 72 : 28 d.r. (Colorless oil)

**TLC (SiO<sub>2</sub>)** R<sub>f</sub> = 0.40 (*n*-hexane : EtOAc = 4 : 1)

**<sup>1</sup>H NMR (500 MHz, CDCl<sub>3</sub>)** δ 7.30-7.28 (m, 2H), 7.19-7.13 (m, 2H), 3.82-3.73 (m, 6H), 3.46 (ddd, *J* = 10.3, 8.0, 7.5 Hz, 0.72H), 3.40 (dd, *J* = 10.3, 2.9 Hz, 0.26H), 3.20 (dd, *J* = 10.3, 6.9 Hz, 0.27H), 2.96-2.53 (m, 5H), 2.38-2.33 (m, 1.32H), 2.26 (dd, *J* = 14.3, 10.9 Hz, 0.28H).

**<sup>13</sup>C {<sup>1</sup>H} NMR (125 MHz, CDCl<sub>3</sub>)** δ 172.8, 172.6, 172.5, 172.4, 139.2, 137.9, 132.8, 132.7, 129.5, 128.92, 128.86, 128.7, 58.6, 57.6, 53.08, 53.05, 53.02, 52.97, 48.6, 48.4, 46.4, 45.6, 42.2, 38.8, 38.1, 35.1, 34.7. \* One carbon signal was overlapped.

**FTIR (ATR)** 2954, 2850, 1731, 1597, 1494, 1435, 1414, 1347, 1266, 1200, 1168, 1093, 1066, 1027, 1014, 937, 866, 830, 801, 762, 719 cm<sup>-1</sup>.

**HRMS m/z (DART)** calcd for C<sub>16</sub>H<sub>19</sub>BrClO<sub>4</sub><sup>+</sup> (M+H)<sup>+</sup>, 389.0150; found, 389.0158.

Dimethyl 4-(bromomethyl)-3-(4-bromophenyl)-1,1-cyclopentanedicarboxylate (**5h**)

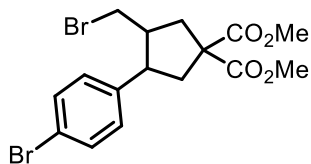

43 %, 18.6 mg, 56 : 44 d.r. (Colorless oil)

**TLC (SiO<sub>2</sub>)** R<sub>f</sub> = 0.40 (*n*-hexane : EtOAc = 4 : 1)

**<sup>1</sup>H NMR (500 MHz, CDCl<sub>3</sub>)** δ 7.45-7.44 (m, 2H), 7.14-7.07 (m, 2H), 3.81-3.73 (m, 6H), 3.43 (ddd, *J* = 10.3, 8.0, 7.5 Hz, 0.56H), 3.38 (dd, *J* = 10.3, 2.9 Hz, 0.42H), 3.20 (dd, *J* = 10.3, 6.9 Hz, 0.44H), 2.96-2.67 (m, 4H), 2.55 (dd, *J* = 13.8, 10.3 Hz, 0.63H), 2.38-2.33 (m, 1.41H), 2.25 (dd, *J* = 10.3, 3.4 Hz, 0.47H).

**<sup>13</sup>C {<sup>1</sup>H} NMR (125 MHz, CDCl<sub>3</sub>)** δ 172.7, 172.5, 172.43, 172.39, 139.7, 138.4, 131.9, 131.6, 129.9, 129.2, 120.81, 120.76, 58.5, 57.6, 53.1, 53.04, 53.00, 52.96, 48.7, 48.3, 46.5, 45.5, 42.1, 38.8, 38.0, 35.1, 34.6. \* One carbon signal was overlapped.

**FTIR (ATR)** 2952, 2924, 2849, 1905, 1730, 1591, 1490, 1434, 1410, 1347, 1259, 1200, 1166, 1096, 1073, 1027, 1010, 936, 865, 825, 759, 717, 676 cm<sup>-1</sup>.

**HRMS m/z (DART)** calcd for C<sub>16</sub>H<sub>19</sub>Br<sub>2</sub>O<sub>4</sub><sup>+</sup> (M+H)<sup>+</sup>, 432.9645; found, 432.9661.

Dimethyl-3-([1,1'-biphenyl]-4-yl)-4-(bromomethyl)-1,1-cyclopentanedicarboxylate (**5i**)

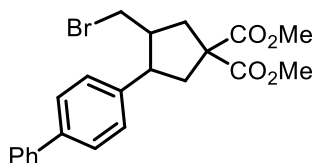

55 %, 23.5 mg, 54 : 46 d.r. (Colorless oil)

**TLC (SiO<sub>2</sub>)** R<sub>f</sub> = 0.20 (*n*-hexane : EtOAc = 4 : 1)

**<sup>1</sup>H NMR (500 MHz, CDCl<sub>3</sub>)** δ 7.59-7.54 (m, 4H), 7.45-7.42 (m, 2H), 7.36-

-7.27 (m, 3H), 3.83-3.74 (m, 6H), 3.53 (ddd, *J* = 10.3, 8.0, 7.5 Hz, 0.58H), 3.46 (dd, *J* = 10.3, 7.5 Hz, 0.42H), 3.26 (dd, *J* = 10.3, 6.9 Hz, 0.44H), 3.02-2.96 (m, 1.58H), 2.86-2.65 (m, 3.10H), 2.49-2.39 (m, 1.34H), 2.28 (dd, *J* = 13.8, 10.3 Hz, 0.44H).

**<sup>13</sup>C {<sup>1</sup>H} NMR (125 MHz, CDCl<sub>3</sub>)** δ 172.8, 172.7, 172.61, 172.56, 140.7, 140.6, 140.0, 139.8, 139.7, 138.4, 128.8, 128.6, 127.9, 127.5, 127.3, 127.25, 127.19, 127.0, 126.9, 58.6, 57.6, 53.05, 53.02, 52.98, 52.95, 49.0, 48.4, 46.8, 45.7, 42.3, 38.94, 38.88, 38.1, 35.5, 35.3. \* One carbon signal was overlapped.

**FTIR (ATR)** 3029, 2953, 2925, 2852, 1732, 1600, 1522, 1488, 1435, 1263, 1200, 1167, 1097, 1008, 937, 839, 766, 736, 699 cm<sup>-1</sup>.

**HRMS *m/z* (DART)** calcd for C<sub>22</sub>H<sub>24</sub>BrO<sub>4</sub><sup>+</sup> (*M*+H)<sup>+</sup>, 431.0852; found, 431.0874.

Dimethyl-4-(bromomethyl)-3-(naphthalen-2-yl)-1,1-cyclopentanedicarboxylate (**5j**)

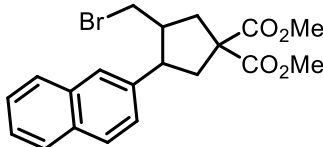

38 %, 15.4 mg, 57 : 43 d.r. (Colorless oil)

**TLC (SiO<sub>2</sub>)** R<sub>f</sub> = 0.50 (*n*-hexane : EtOAc = 4 : 1)

**<sup>1</sup>H NMR (500 MHz, CDCl<sub>3</sub>)** δ 7.83-7.79 (m, 3H), 7.68-7.63 (m, 1H), 7.49-7.45 (m, 2H), 7.39-7.31 (m, 1H), 3.84-3.74 (m, 6H), 3.68-3.63 (m, 0.58H), 3.44 (dd, *J* = 10.3, 3.4 Hz, 0.41H), 3.25 (dd, *J* = 10.3, 6.9 Hz, 0.42H), 3.14-3.08 (m, 0.47H), 2.96-2.44 (m, 5.39H), 2.31 (dd, *J* = 13.8, 10.9 Hz, 0.43H).

**<sup>13</sup>C {<sup>1</sup>H} NMR (125 MHz, CDCl<sub>3</sub>)** δ 172.9, 172.7, 172.62, 172.60, 138.0, 136.7, 133.5, 133.3, 132.6, 132.3, 128.6, 128.2, 127.7, 127.62, 127.58, 126.6, 126.5, 126.4, 126.30, 126.28, 125.8, 125.7, 125.2, 58.6, 57.7, 53.07, 53.05, 53.01, 52.97, 49.5, 48.3, 47.2, 45.5, 42.3, 39.0, 38.9, 37.8, 35.5, 35.4. \* One carbon signal was overlapped.

**FTIR (ATR)** 3054, 2953, 4731, 1633, 1601, 1508, 1435, 1377, 1260, 1227, 1200, 1166, 1127, 1097, 1069, 1027, 959, 892, 858, 820, 751, 703 cm<sup>-1</sup>.

**HRMS m/z (DART)** calcd for C<sub>20</sub>H<sub>22</sub>BrO<sub>4</sub><sup>+</sup> (M+H)<sup>+</sup>, 405.0696; found, 405.0704.

Dimethyl-4-(bromomethyl)-3-(pyridine-2-yl)-1,1-cyclopentanedicarboxylate (**5k**)

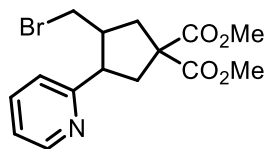

67 %, 24.0 mg, 70 : 30 d.r. (Colorless oil)

**TLC (SiO<sub>2</sub>)** R<sub>f</sub> = 0.20 (*n*-hexane : EtOAc = 4 : 1)

**<sup>1</sup>H NMR (500 MHz, CDCl<sub>3</sub>)** δ 8.56-8.55 (m, 1H), 7.64-7.60 (m, 1H), 7.21-7.14 (m, 2H), 3.82-3.76 (m, 6H), 3.48 (dd, *J* = 10.3, 3.4 Hz, 0.72H), 3.30 (dd, *J* = 10.3, 6.3 Hz, 0.71H), 3.18-3.12 (m, 0.73H), 3.04-2.53 (m, 4.23H), 2.25-2.05 (m, 1.59H).

**<sup>13</sup>C {<sup>1</sup>H} NMR (125 MHz, CDCl<sub>3</sub>)** δ major diastereomer 172.8, 172.4, 160.1, 149.7, 136.5, 123.2, 122.0, 58.0, 53.85, 52.89, 50.9, 46.9, 41.1, 38.6, 36.0.

**FTIR (ATR)** 3458, 3004, 2955, 2894, 2844, 1730, 1591, 1571, 1435, 1254, 1202, 1166, 964, 864, 753, 729 cm<sup>-1</sup>.

**HRMS m/z (DART)** calcd for C<sub>15</sub>H<sub>19</sub>BrNO<sub>4</sub><sup>+</sup> (M+H)<sup>+</sup>, 356.0492; found, 356.0494.

Dimethyl 4-(bromomethyl)-2-methyl-3-phenyl-1,1-cyclopentanedicarboxylate (**5l**)

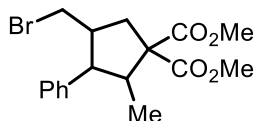

26 %, 9.6 mg, 59 : 41 d.r. (Colorless oil)

**TLC (SiO<sub>2</sub>)** R<sub>f</sub> = 0.60 (*n*-hexane : EtOAc = 4 : 1)

**<sup>1</sup>H NMR (500 MHz, CDCl<sub>3</sub>)**

**Major** δ 7.34-7.31 (m, 2H), 7.26-7.23 (m, 1H), 7.16 (d, *J* = 7.5 Hz, 2H), 3.80 (s, 3H), 3.77 (s, 3H), 3.18 (dd, *J* = 12.6, 7.5 Hz, 1H), 3.11 (dd, *J* = 12.6, 6.9 Hz, 1H), 2.96-2.85 (m, 2H), 2.58-2.49 (m, 2H), 2.09-2.04 (m, 1H), 0.98 (d, *J* = 6.3 Hz, 3H).

**Minor** δ 7.34-7.31 (m, 2H), 7.26-7.23 (m, 1H), 7.20 (d, *J* = 7.5 Hz, 2H), 3.79 (s, 3H), 3.76 (s, 3H), 3.36 (dd, *J* = 10.3, 3.4 Hz, 1H), 3.30 (dd, *J* = 10.3, 8.6 Hz, 1H), 2.96-2.85 (m, 4H), 2.43-2.37 (m, 1H), 0.86 (d, *J* = 6.9 Hz, 3H).

**<sup>13</sup>C {<sup>1</sup>H} NMR (125 MHz, CDCl<sub>3</sub>)**

**Major** δ 172.5, 171.9, 138.0, 128.7, 128.6, 127.0, 62.0, 54.0, 52.7, 52.3, 47.6, 43.5, 40.0, 37.7, 30.9.

**Minor** δ 172.8, 172.1, 140.1, 128.8, 127.9, 127.2, 61.6, 56.6, 52.7, 52.3, 47.9, 43.0, 38.7, 35.9, 29.7.

**FTIR (ATR)** 2954, 1729, 1602, 1497, 1455, 1435, 1380, 1261, 1206, 1157, 1157, 1071, 1013, 803, 778, 749, 702 cm<sup>-1</sup>.

**HRMS m/z (DART)** calcd for C<sub>17</sub>H<sub>22</sub>BrO<sub>4</sub><sup>+</sup> (M+H)<sup>+</sup>, 369.0696; found, 369.0709.

## 6. Synthesis of cyclic compounds 6

Diethyl 4-(bromomethyl)-3-phenylcyclopent-2-ene-1,1-dicarboxylate (**6b**)<sup>[1]</sup>

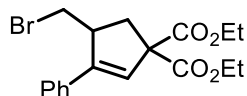

51 %, 19.4 mg (Colorless oil)

**TLC (SiO<sub>2</sub>)**  $R_f$  = 0.40 (*n*-hexane : EtOAc = 4 : 1)

**<sup>1</sup>H NMR (500 MHz, CDCl<sub>3</sub>)**  $\delta$  7.42-7.30 (m, 5H), 6.20 (d,  $J$  = 1.2 Hz, 1H), 4.27-4.19 (m, 4H), 3.80-3.72 (m, 1H), 3.58 (d,  $J$  = 10.3 Hz, 1H), 3.31 (dd,  $J$  = 10.3, 9.7 Hz, 1H), 2.89 (dd,  $J$  = 13.8, 8.0 Hz, 1H), 2.63 (dd,  $J$  = 13.8, 4.0 Hz, 1H), 1.32-1.25 (m, 6H).

**<sup>13</sup>C {<sup>1</sup>H} NMR (125 MHz, CDCl<sub>3</sub>)**  $\delta$  170.84, 170.77, 147.6, 133.8, 128.7, 128.5, 126.6, 126.0, 65.3, 61.8, 47.5, 36.5, 14.1, 14.0.

Di(iso-propyl)-4-(bromomethyl)-3-phenylcyclopent-2-ene-1,1-dicarboxylate (**6c**)

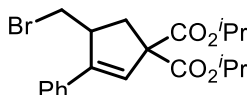

65 %, 26.6 mg (Colorless oil)

**TLC (SiO<sub>2</sub>)**  $R_f$  = 0.40 (*n*-hexane : EtOAc = 4 : 1)

**<sup>1</sup>H NMR (500 MHz, CDCl<sub>3</sub>)**  $\delta$  7.42-7.29 (m, 5H), 6.18 (d,  $J$  = 1.8 Hz, 1H), 5.11-5.02 (m, 2H), 3.77-3.75 (m, 1H), 3.57 (dd,  $J$  = 10.3, 3.4 Hz, 1H), 3.32 (dd,  $J$  = 10.3, 9.7 Hz, 1H), 2.85 (dd,  $J$  = 13.8, 8.6 Hz, 1H), 2.63 (dd,  $J$  = 13.8, 3.4 Hz, 1H), 1.29-1.21 (m, 12H).

**<sup>13</sup>C {<sup>1</sup>H} NMR (125 MHz, CDCl<sub>3</sub>)**  $\delta$  170.4, 170.3, 147.5, 133.9, 128.7, 128.4, 126.6, 126.2, 69.2, 65.4, 47.6, 36.5, 36.3, 47.6, 36.5, 36.3, 21.6, 21.5.

**FTIR (ATR)** 3059, 2981, 2935, 1724, 1600, 1576, 1497, 1467, 1448, 1387, 1375, 1348, 1298, 1248, 1204, 1182, 1145, 1103, 1076, 1040, 1002, 962, 913, 855, 828, 765, 696, 673 cm<sup>-1</sup>.

**HRMS  $m/z$  (DART)** calcd for C<sub>20</sub>H<sub>26</sub>BrO<sub>4</sub><sup>+</sup> (M+H)<sup>+</sup>, 409.1009; found, 409.1007.

Ethyl 1-acetyl-4-(bromomethyl)-3-phenylcyclopent-2-enecarboxylate (**6d**)<sup>[1]</sup>

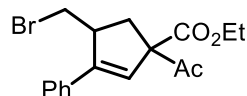

78 %, 27.3 mg, 57 : 43 d.r. (Colorless oil)

**TLC (SiO<sub>2</sub>)**  $R_f$  = 0.20 (*n*-hexane : EtOAc = 4 : 1)

**<sup>1</sup>H NMR (500 MHz, CDCl<sub>3</sub>)**  $\delta$  7.41-7.32 (m, 5H), 6.23-6.22 (m, 1H), 4.20-4.19 (m, 2H), 3.78-3.72 (m, 1H), 3.60-3.54 (m, 1H), 3.31-3.23 (m, 1H), 2.92 (dd,  $J$  = 14.3, 8.6 Hz, 0.44H), 2.80 (dd,  $J$  =

14.3, 8.6 Hz, 0.54H), 2.61 (dd,  $J = 14.3, 4.6$  Hz, 0.53H), 2.53 (dd,  $J = 14.3, 4.6$  Hz, 0.43H), 2.31 (s, 1.30H), 2.27 (s, 1.58H), 1.32 (t,  $J = 13.8$  Hz, 1.71H), 1.26 (t,  $J = 13.8$  Hz, 1.29H).

**$^{13}\text{C}$  { $^1\text{H}$ } NMR (125 MHz,  $\text{CDCl}_3$ )**  $\delta$  203.5, 202.8, 171.2, 171.1, 148.1, 148.0, 133.9, 133.8, 128.7, 128.5, 126.51, 126.48, 126.0, 125.8, 72.1 (2C), 61.9 (2C), 47.3, 47.1, 36.5 (2C), 35.1, 35.0, 27.0, 26.5, 14.1, 14.0. \* Two carbon signals were overlapped.

Dimethyl 4-(iodomethyl)-3-phenylcyclopent-2-ene-1,1-dicarboxylate (**6e**)

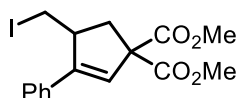

73 %, 29.1 mg. (Colorless oil)

**TLC ( $\text{SiO}_2$ )**  $R_f = 0.40$  ( $n$ -hexane : EtOAc = 4 : 1)

**$^1\text{H}$  NMR (500 MHz,  $\text{CDCl}_3$ )**  $\delta$  7.41-7.32 (m, 5H), 6.23 (d,  $J = 1.2$  Hz, 1H), 3.80 (s, 3H), 3.74 (s, 3H), 3.70-3.65 (m, 1H), 3.42 (dd,  $J = 9.5, 2.9$  Hz, 1H), 3.10 (t,  $J = 9.5$  Hz, 1H), 2.94 (dd,  $J = 14.3, 8.0$  Hz, 1H), 2.51 (dd,  $J = 14.3, 4.6$  Hz, 1H).

**$^{13}\text{C}$  { $^1\text{H}$ } NMR (125 MHz,  $\text{CDCl}_3$ )**  $\delta$  171.13, 171.10, 148.8, 133.8, 128.7, 128.5, 126.6, 125.3, 64.8, 52.99, 52.97, 47.4, 38.5, 11.3.

**FTIR (ATR)** 3026, 2953, 2923, 2850, 1733, 1599, 1576, 1495, 1446, 1444, 1247, 1209, 1176, 1134, 1076, 1042, 1007, 966, 947, 922, 850, 765, 697  $\text{cm}^{-1}$ .

**HRMS  $m/z$  (DART)** calcd for  $\text{C}_{16}\text{H}_{18}\text{IO}_4^+$  ( $\text{M}+\text{H}$ ) $^+$ , 401.0244; found, 401.0236.

Dimethyl 4-(bromomethyl)-4-methyl-3-phenylcyclopent-2-ene-1,1-dicarboxylate (**6f**)

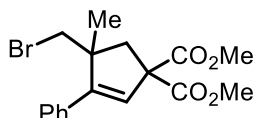

18 %, 6.2 mg. (Colorless oil)

**TLC ( $\text{SiO}_2$ )**  $R_f = 0.40$  ( $n$ -hexane : EtOAc = 4 : 1)

**$^1\text{H}$  NMR (500 MHz,  $\text{CDCl}_3$ )**  $\delta$  7.37-7.29 (m, 5H), 5.90 (s, 1H), 3.79 (s, 3H), 3.78 (s, 3H), 3.45 (s, 2H), 2.88 (d,  $J = 13.8$  Hz, 1H), 2.53 (d,  $J = 13.8$  Hz, 1H), 1.41 (s, 3H).

**$^{13}\text{C}$  { $^1\text{H}$ } NMR (125 MHz,  $\text{CDCl}_3$ )**  $\delta$  171.4, 171.3, 152.2, 135.0, 128.2, 128.0, 127.3, 63.6, 53.0, 52.9, 52.3, 44.0, 43.1, 25.6. \* One carbon signal was overlapped.

**FTIR (ATR)** 2955, 2926, 2852, 1734, 1494, 1434, 1376, 1288, 1243, 1146, 1107, 1072, 1032, 960, 848, 766, 700  $\text{cm}^{-1}$ .

**HRMS  $m/z$  (DART)** calcd for  $\text{C}_{17}\text{H}_{20}\text{BrO}_4^+$  ( $\text{M}+\text{H}$ ) $^+$ , 367.0539; found, 367.0535.

Dimethyl 4-(bromomethyl)-3-phenylcyclohex-2-ene-1,1-dicarboxylate (**6g**)



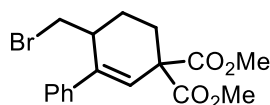

23 %, 8.4 mg. (Colorless oil)

**TLC (SiO<sub>2</sub>)** R<sub>f</sub> = 0.30 (*n*-hexane : EtOAc = 4 : 1)

**<sup>1</sup>H NMR (500 MHz, CDCl<sub>3</sub>)** δ 7.36-7.30 (m, 5H), 6.18 (d, *J* = 1.2 Hz, 1H), 3.80 (s, 3H), 3.72 (s, 3H), 3.34 (dd, *J* = 10.3, 2.9 Hz, 1H), 3.19 (dd, *J* = 10.3, 9.7 Hz, 1H), 3.17-3.10 (m, 1H), 2.32-2.27 (m, 1H), 2.16-2.10 (m, 2H), 2.06-2.00 (m, 1H).

**<sup>13</sup>C {<sup>1</sup>H} NMR (125 MHz, CDCl<sub>3</sub>)** δ 171.1, 170.7, 142.1, 139.8, 128.6, 128.0, 126.6, 124.7, 55.5, 53.0, 52.9, 38.0, 35.5, 24.9, 23.2.

**FTIR (ATR)** 2954, 2926, 2853, 1734, 1600, 1576, 1493, 1446, 1434, 1362, 1264, 1236, 1218, 1172, 1146, 1079, 1062, 1015, 967, 917, 865, 762, 700, 676 cm<sup>-1</sup>.

**HRMS *m/z* (DART)** calcd for C<sub>17</sub>H<sub>20</sub>BrO<sub>4</sub><sup>+</sup> (*M*+*H*)<sup>+</sup>, 367.0539; found, 367.0533.

(*E*)-Dimethyl 4-(bromomethylene)-3-phenylcyclopent-2-ene-1,1-dicarboxylate (**6h**)

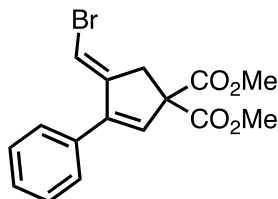

34 %, 11.9 mg, *E* / *Z* = 95 : 5 (Colorless oil)

**TLC (SiO<sub>2</sub>)** R<sub>f</sub> = 0.30 (*n*-hexane : EtOAc = 4 : 1)

**<sup>1</sup>H NMR (500 MHz, CDCl<sub>3</sub>)** δ 7.39-7.33 (m, 5H), 6.29 (s, 1H), 6.25 (t, *J* = 2.3 Hz, 1H), 3.79 (s, 6H), 3.39 (d, *J* = 2.3 Hz, 1H).

**<sup>13</sup>C {<sup>1</sup>H} NMR (125 MHz, CDCl<sub>3</sub>)** δ 170.3, 147.2, 147.0, 133.2, 133.1, 128.63, 128.57, 128.1, 101.5, 63.1, 53.2, 39.4.

**FTIR (ATR)** 3084, 2954, 2847, 1736, 1672, 1622, 1494, 1435, 1259, 1198, 1170, 1119, 1064, 956, 845, 802, 759, 700 cm<sup>-1</sup>.

**HRMS *m/z* (DART)** calcd for C<sub>16</sub>H<sub>16</sub>BrO<sub>4</sub><sup>+</sup> (*M*+*H*)<sup>+</sup>, 351.0226; found, 351.0214.

Dimethyl 2-Allylidene Malonate (**7a**)<sup>[2]</sup>

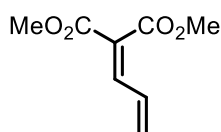

Trace (colorless oil)

**TLC (SiO<sub>2</sub>)** R<sub>f</sub> = 0.50 (*n*-hexane : EtOAc = 4 : 1)

**$^1\text{H}$  NMR (500 MHz,  $\text{CDCl}_3$ )**  $\delta$  7.36 (d,  $J$  = 11.5 Hz, 1H), 6.80-6.73 (m, 1H), 5.80 (d,  $J$  = 17.2 Hz, 1H), 5.69 (d,  $J$  = 10.9 Hz, 1H), 3.86 (s, 3H), 3.81 (s, 3H).

**$^{13}\text{C}$  { $^1\text{H}$ } NMR (125 MHz,  $\text{CDCl}_3$ )**  $\delta$  165.4, 164.8, 145.2, 131.7, 130.0, 125.8, 52.5, 52.4.

Dimethyl 2-allyl-2-(3,5-di-*tert*-butyl-4-hydroxybenzyl)malonate (**7b**)

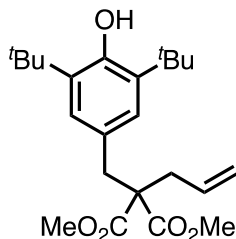

Trace (Colorless oil)

**TLC ( $\text{SiO}_2$ )**  $R_f$  = 0.50 (*n*-hexane : EtOAc = 4 : 1)

**$^1\text{H}$  NMR (500 MHz,  $\text{CDCl}_3$ )**  $\delta$  6.87 (s, 2H), 5.79-5.70 (m, 1H), 5.17-5.13 (m, 2H), 5.10 (s, 1H), 3.73 (s, 6H), 3.16 (s, 2H), 2.54 (d,  $J$  = 7.5 Hz, 2H), 1.40 (s, 18H).

**$^{13}\text{C}$  { $^1\text{H}$ } NMR (125 MHz,  $\text{CDCl}_3$ )**  $\delta$  171.4, 152.7, 135.5, 132.9, 126.5, 126.2, 119.1, 59.1, 52.3, 38.0, 36.3, 34.2, 30.3, 29.7.

**FTIR (ATR)** 3645, 2956, 2925, 1737, 1437, 1365, 1210  $\text{cm}^{-1}$ .

**HRMS  $m/z$  (DART)** calcd for  $\text{C}_{23}\text{H}_{35}\text{O}_5^+$  ( $\text{M}+\text{H}$ ) $^+$ , 391.2479; found, 391.2489.

## 7. Reference

[1] G. Yuzhen, Z. Pengbo, J. Zhe, T. Guo, Z. Yufen, *ACS Catal.* **2017**, 7, 186–190.

[2] M. Sylla, D. Joseph, E. Chevallier, C. Camara, F. Dumas, *Synthesis* **2006**, 6, 1045–1049.

## 8. $^1\text{H}$ NMR, $^{13}\text{C}$ NMR, $^{19}\text{F}$ and DEPT-135 NMR Spectra of 3

### - $^1\text{H}$ and $^{13}\text{C}$ NMR Spectra of 3a

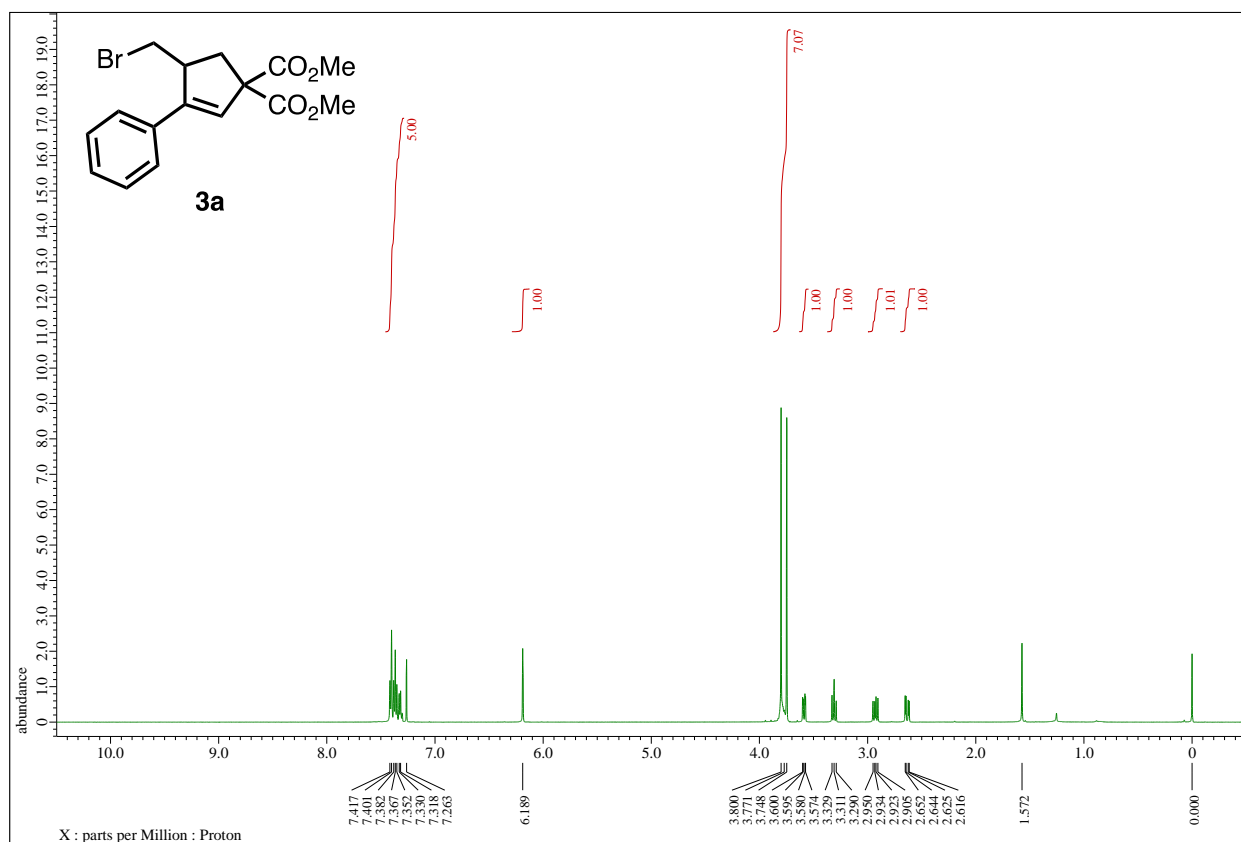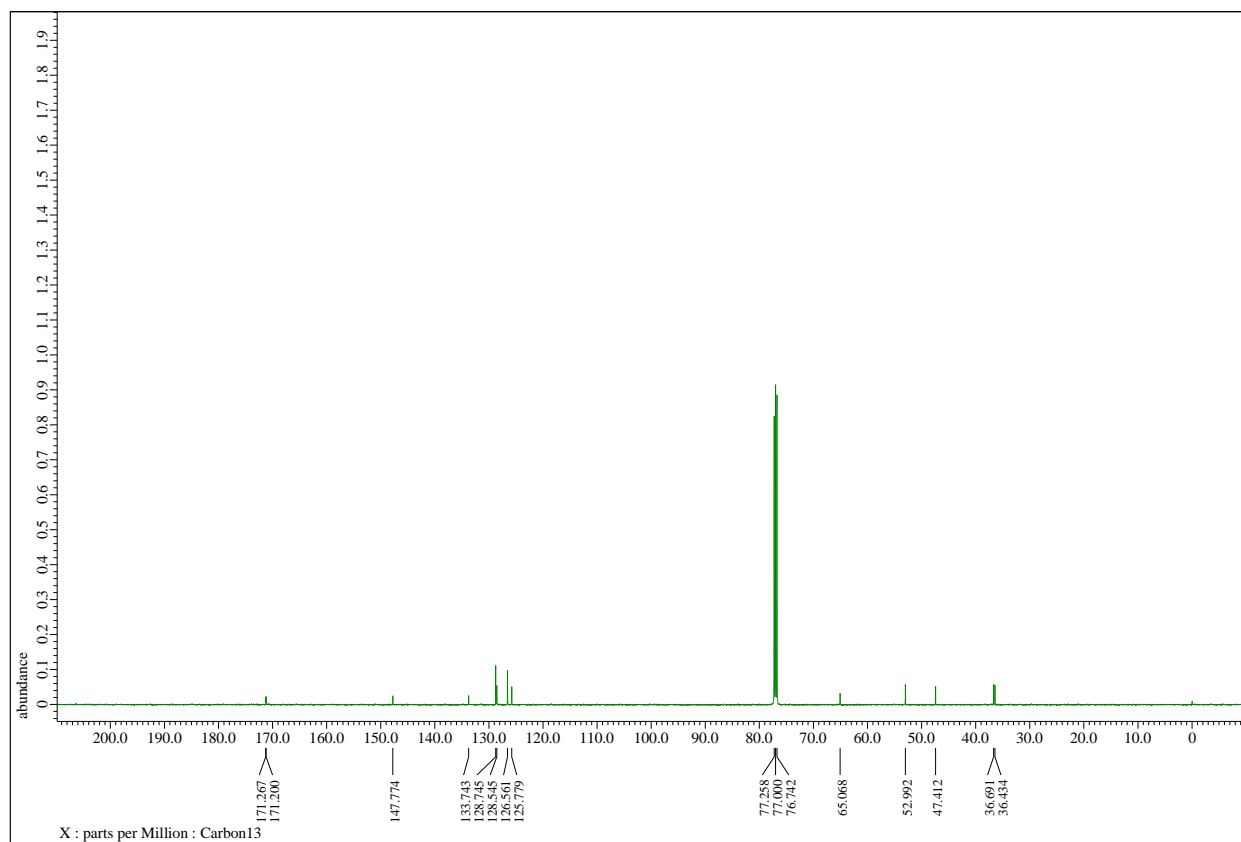

# - $^1\text{H}$ and $^{13}\text{C}$ NMR Spectra of **3b**

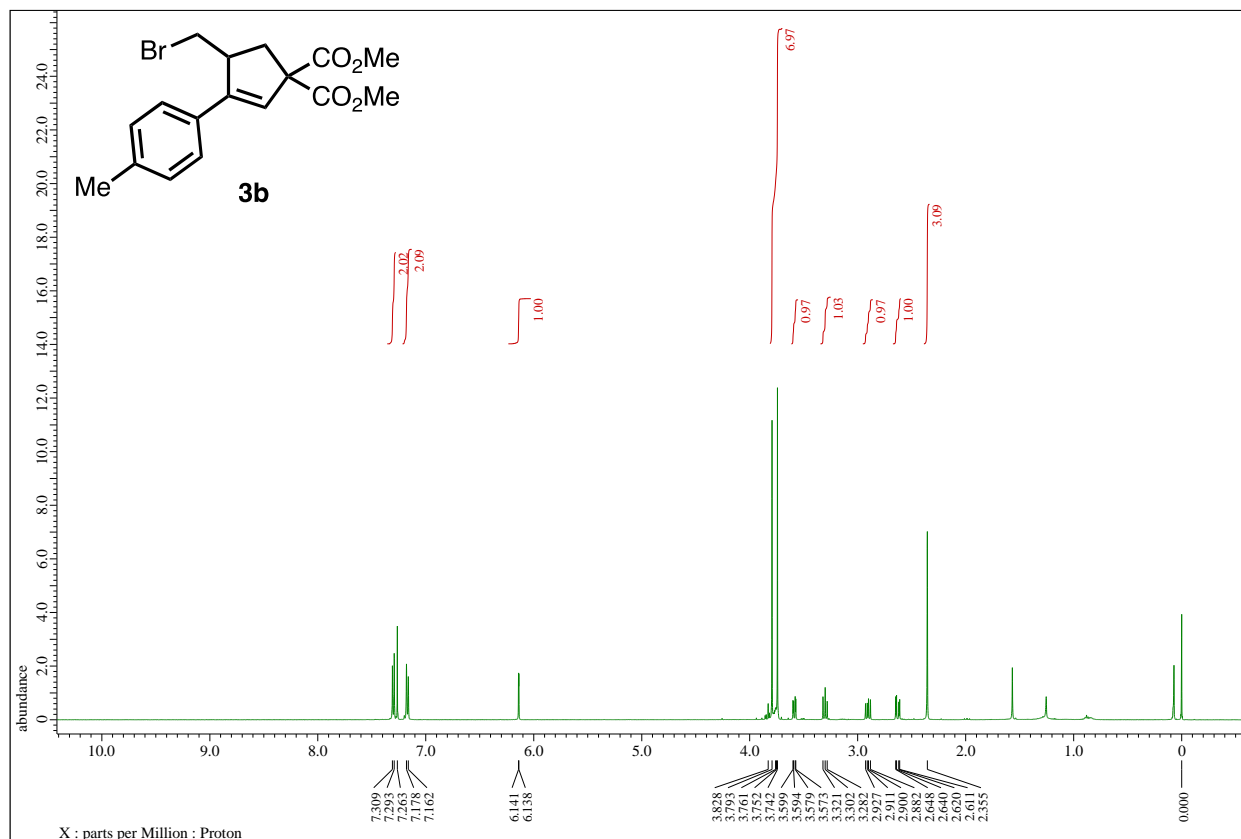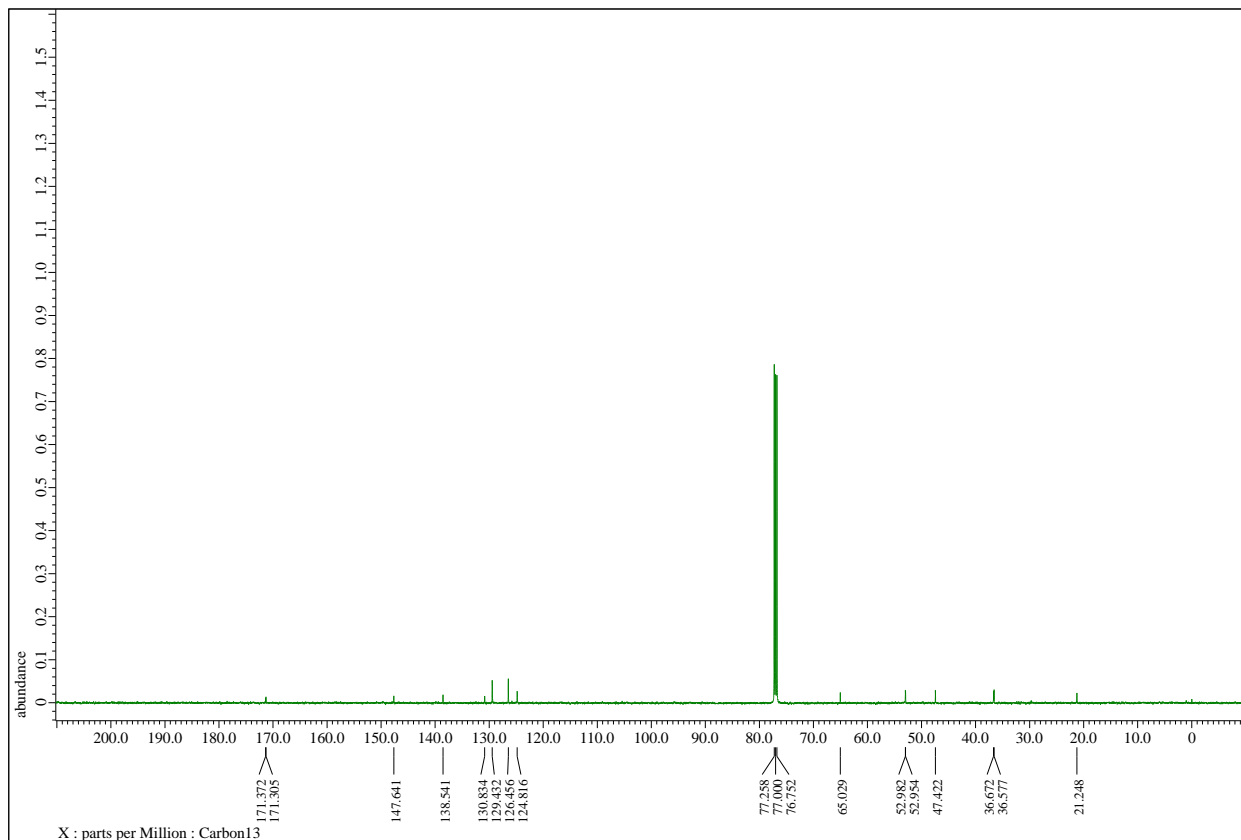

# - $^1\text{H}$ and $^{13}\text{C}$ NMR Spectra of **3c**

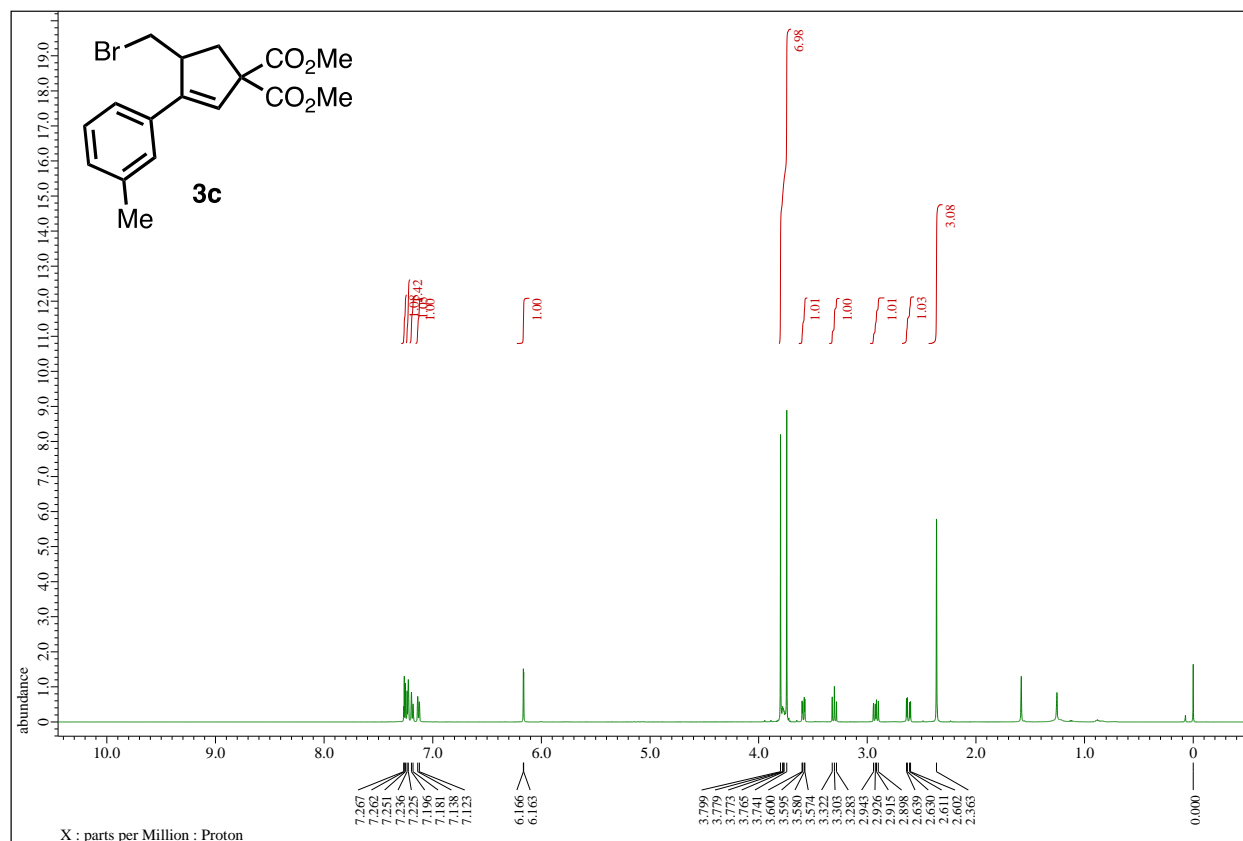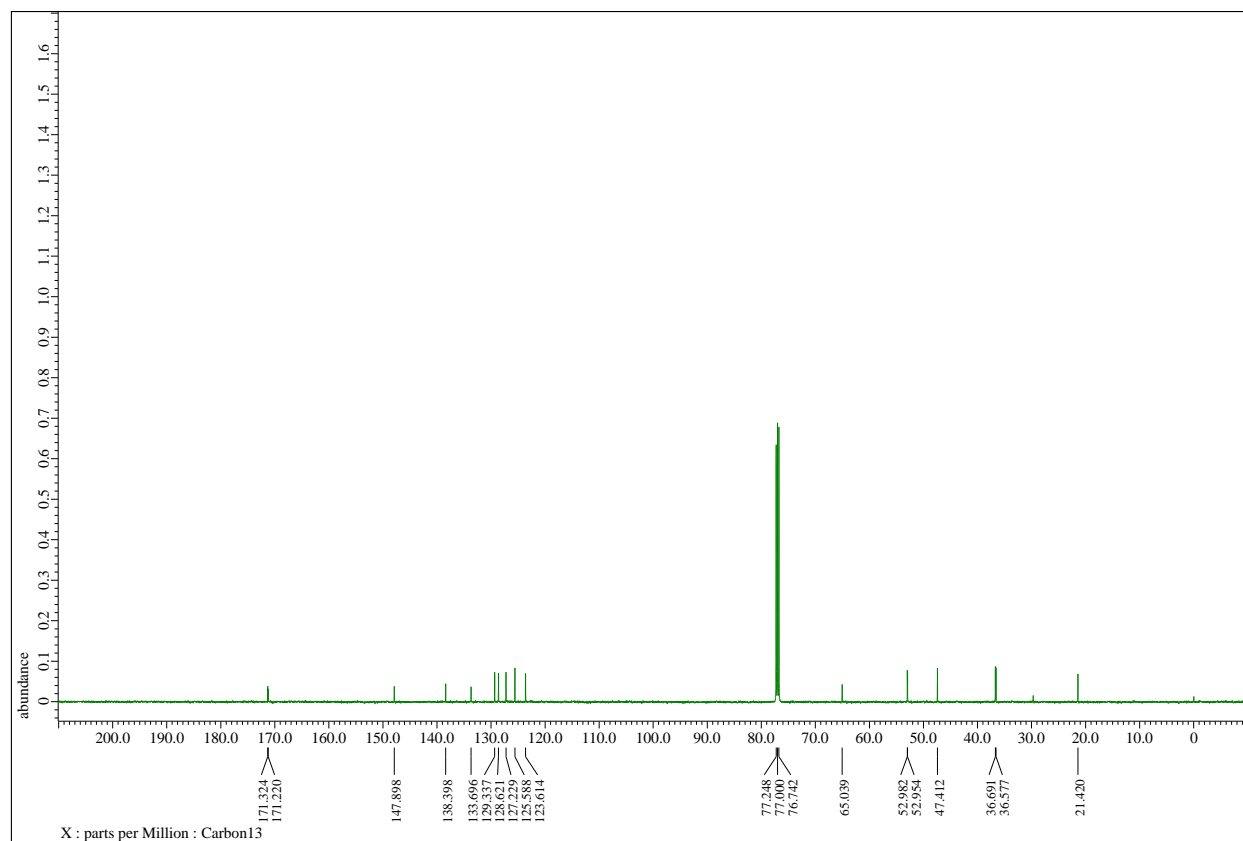

# - $^1\text{H}$ and $^{13}\text{C}$ NMR Spectra of **3d**

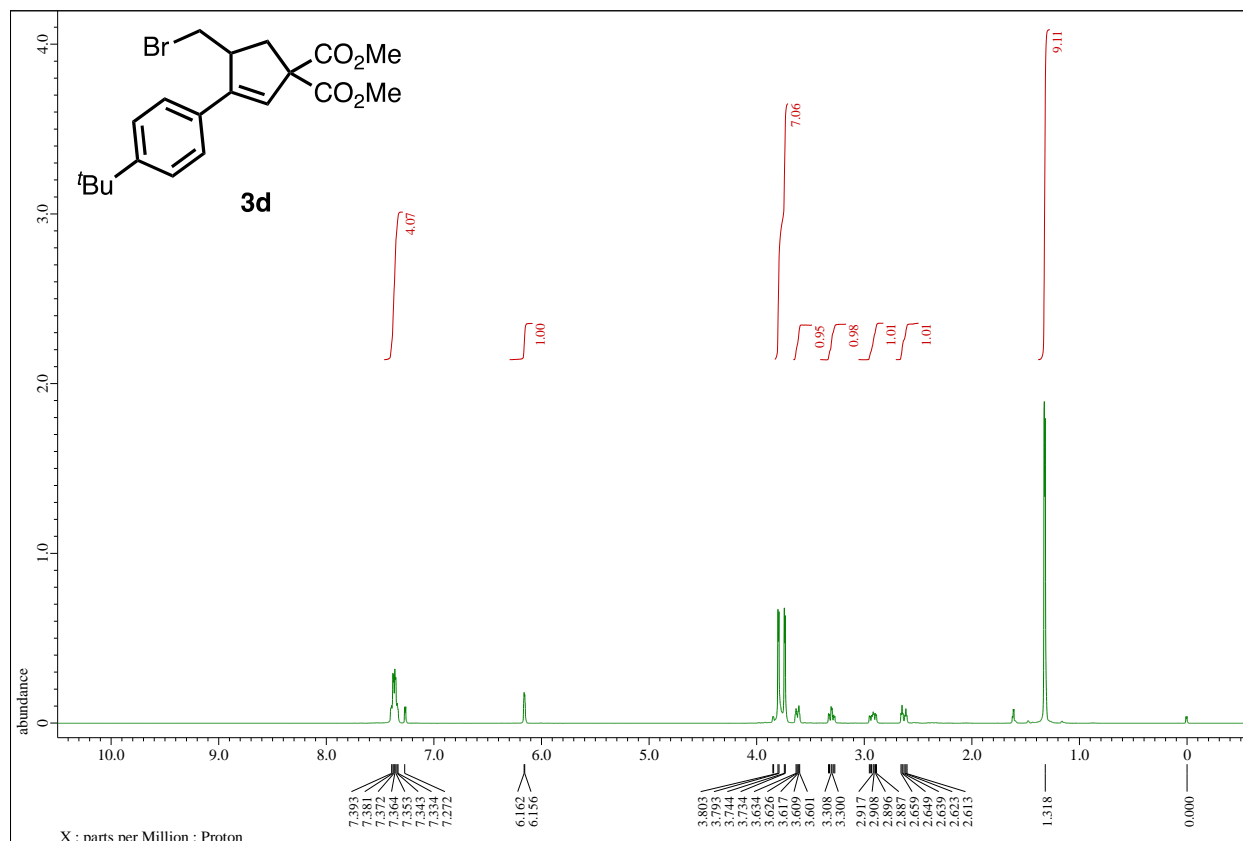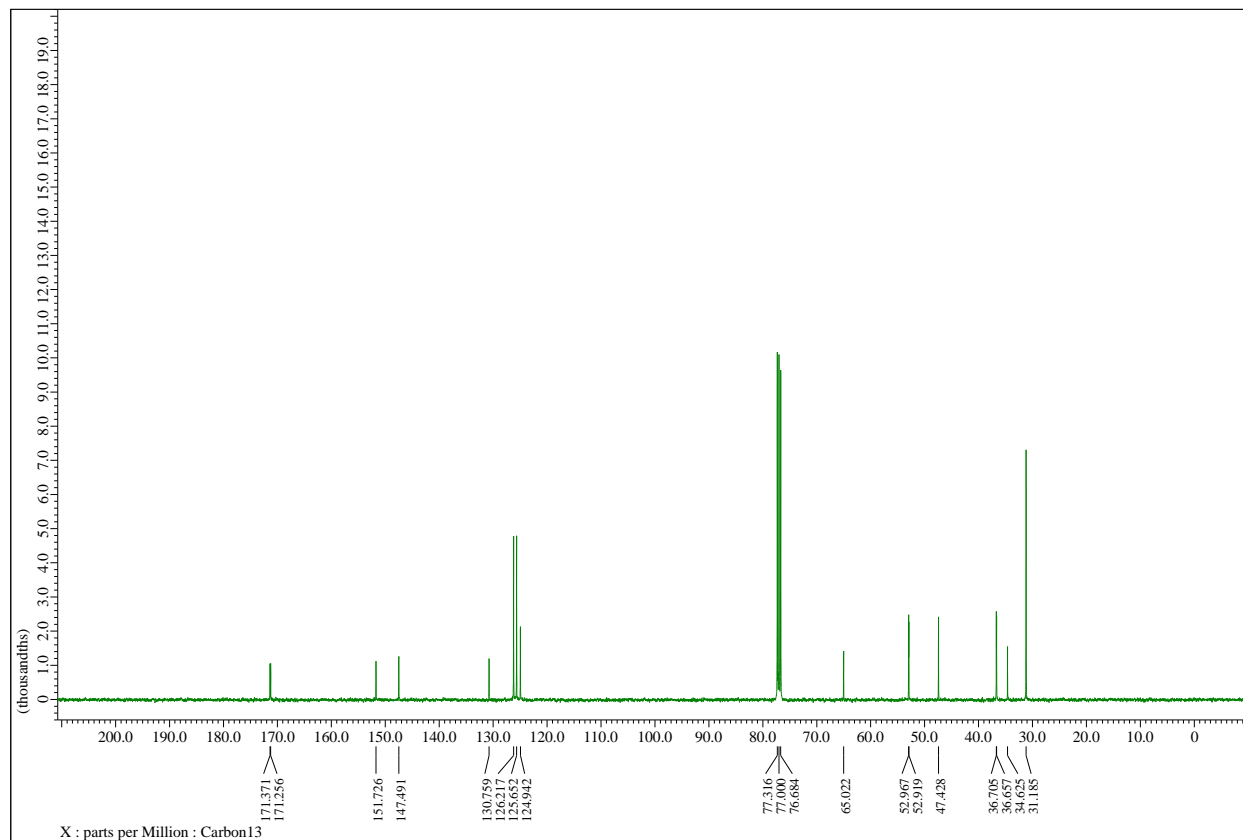

# - $^1\text{H}$ , $^{13}\text{C}$ and $^{19}\text{F}$ NMR Spectra of **3e**

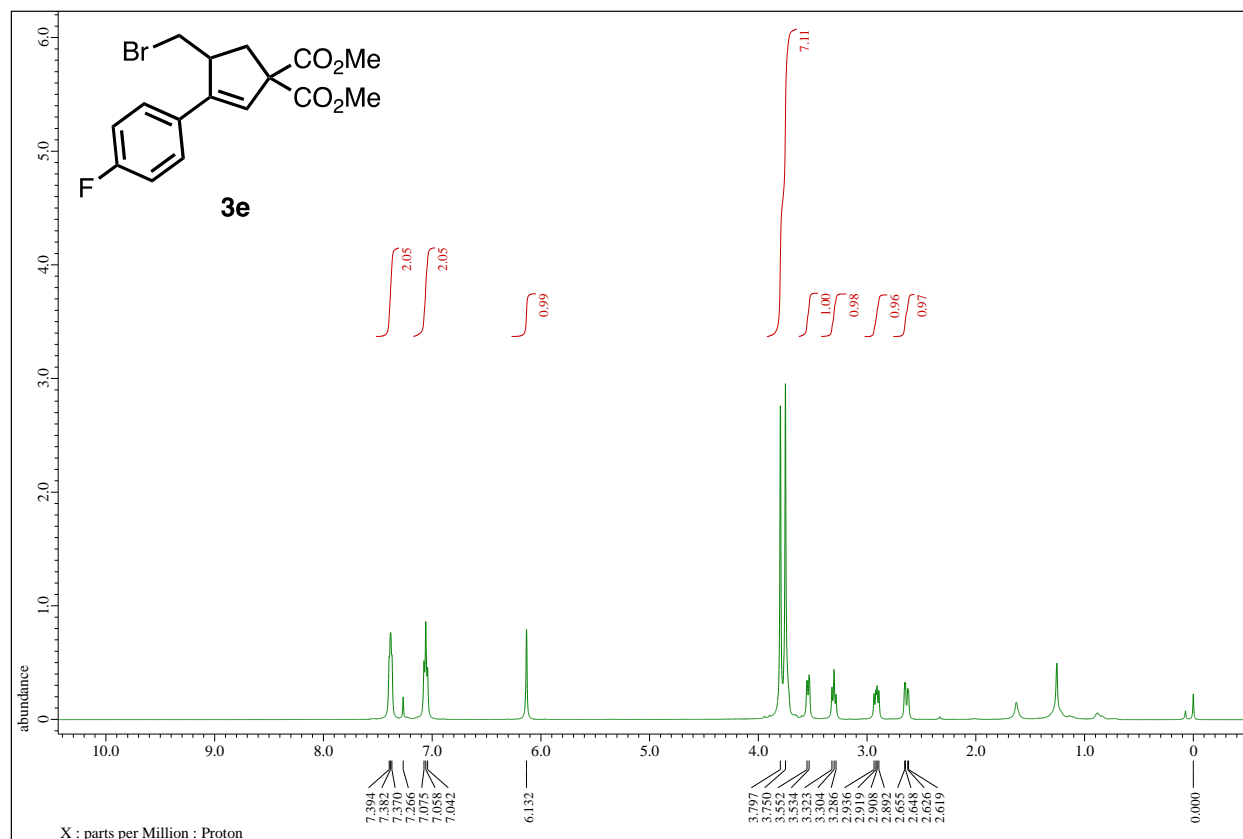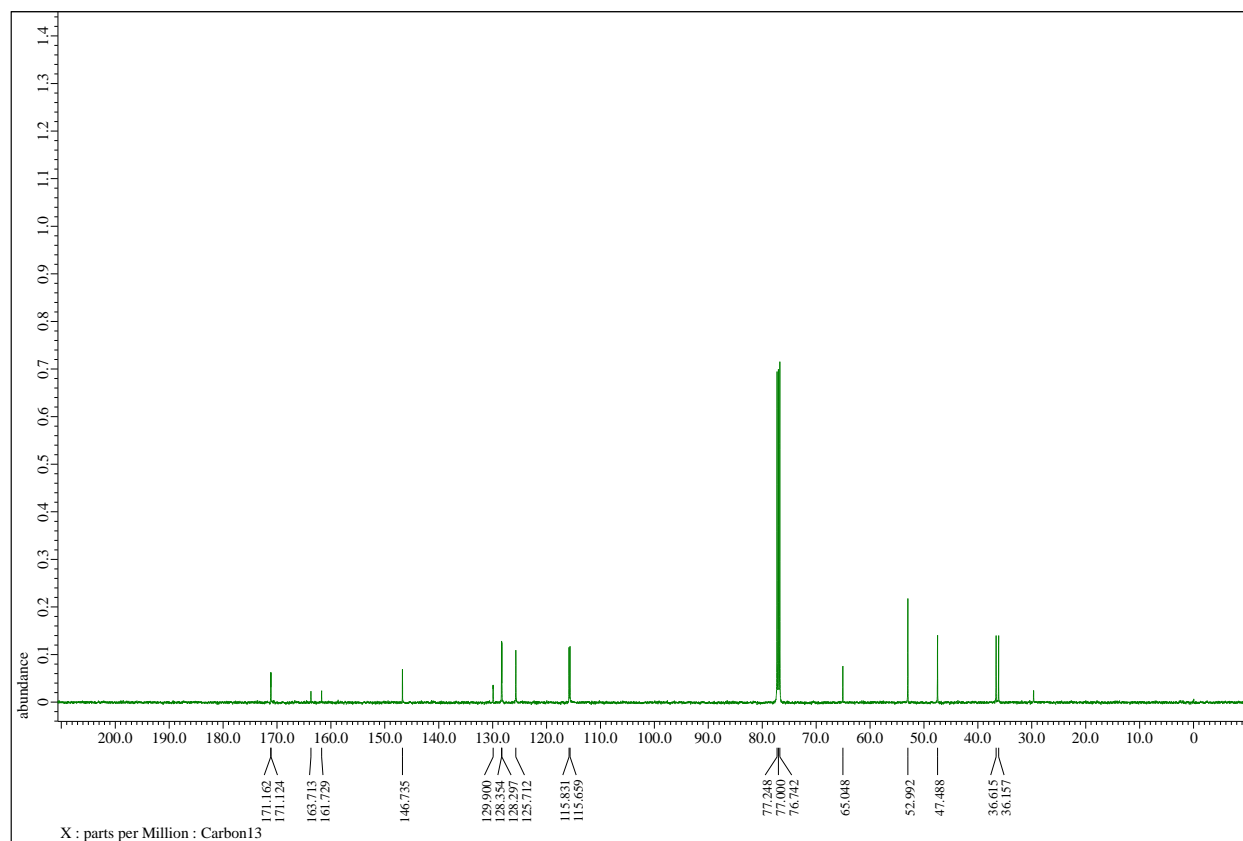

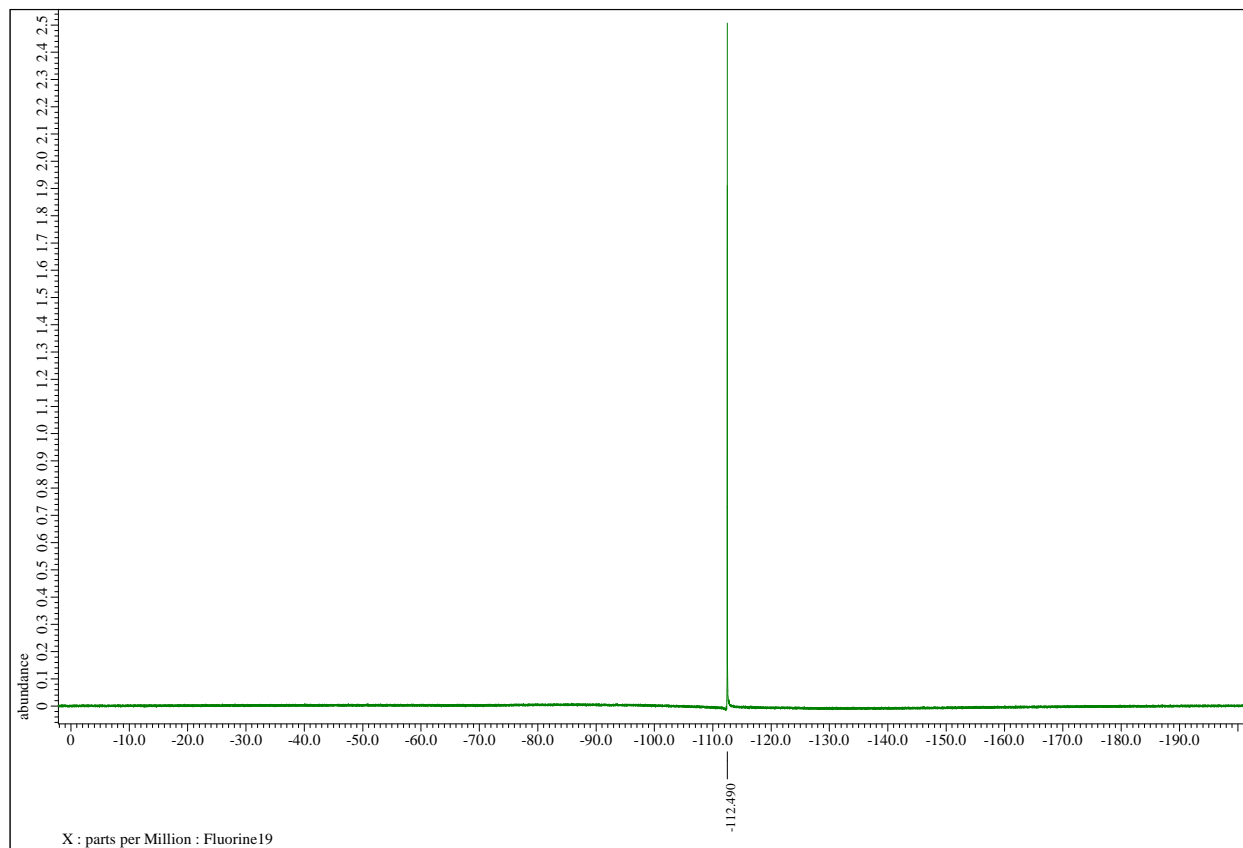



# - $^1\text{H}$ and $^{13}\text{C}$ NMR Spectra of **3f**

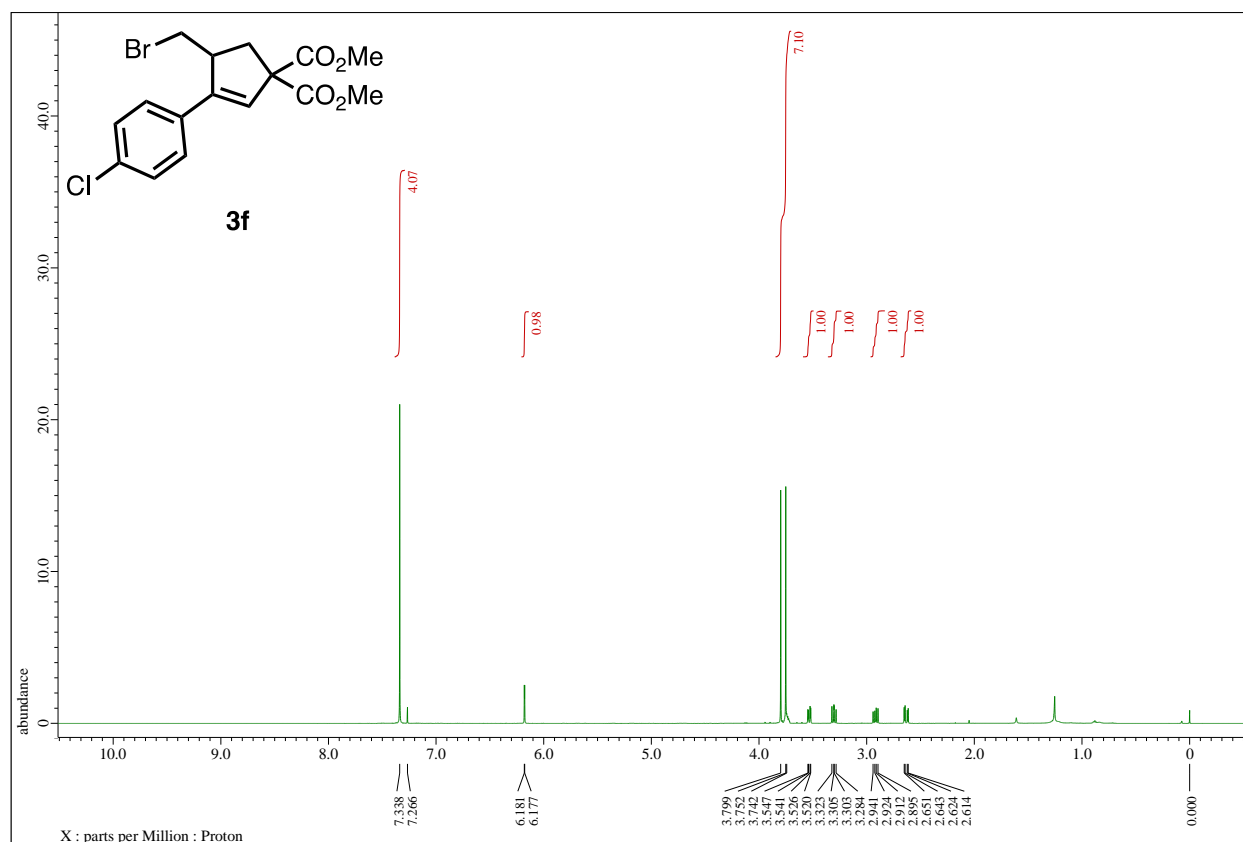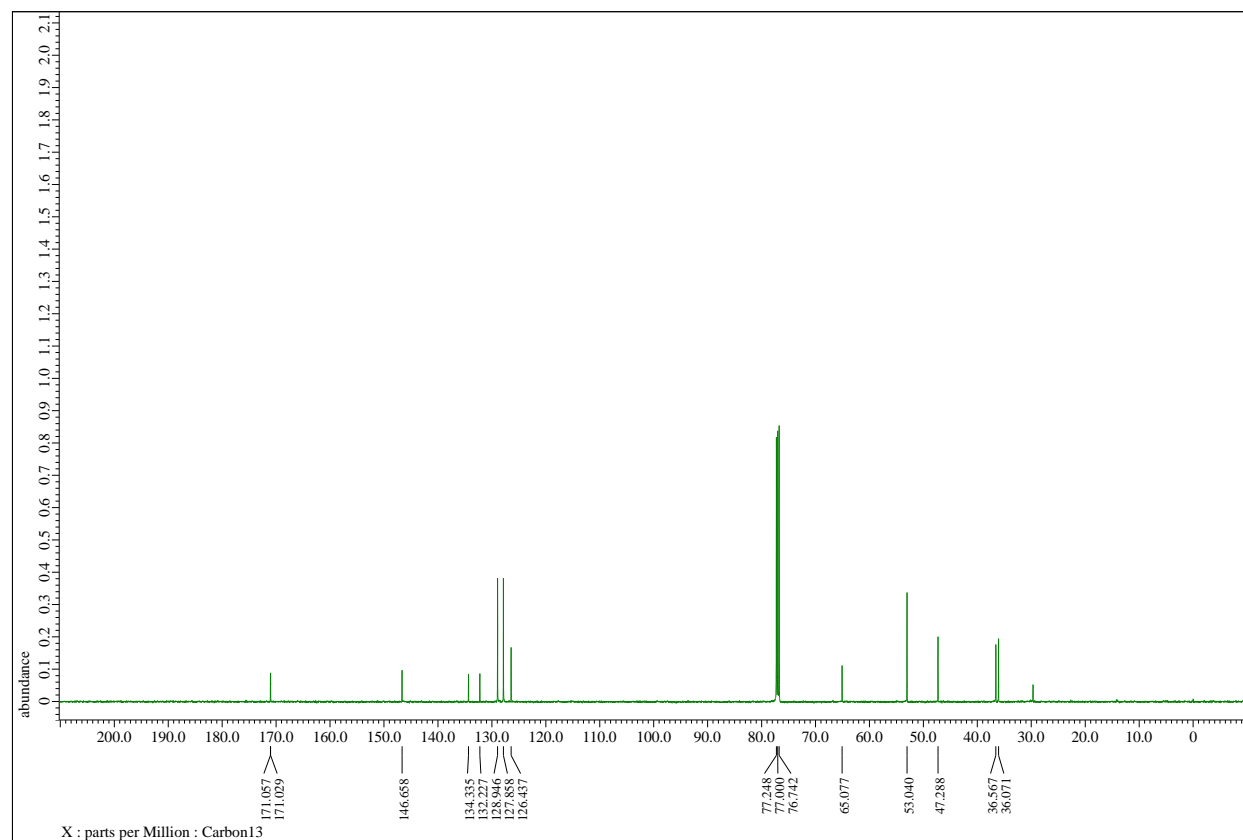

# - $^1\text{H}$ and $^{13}\text{C}$ NMR Spectra of **3g**

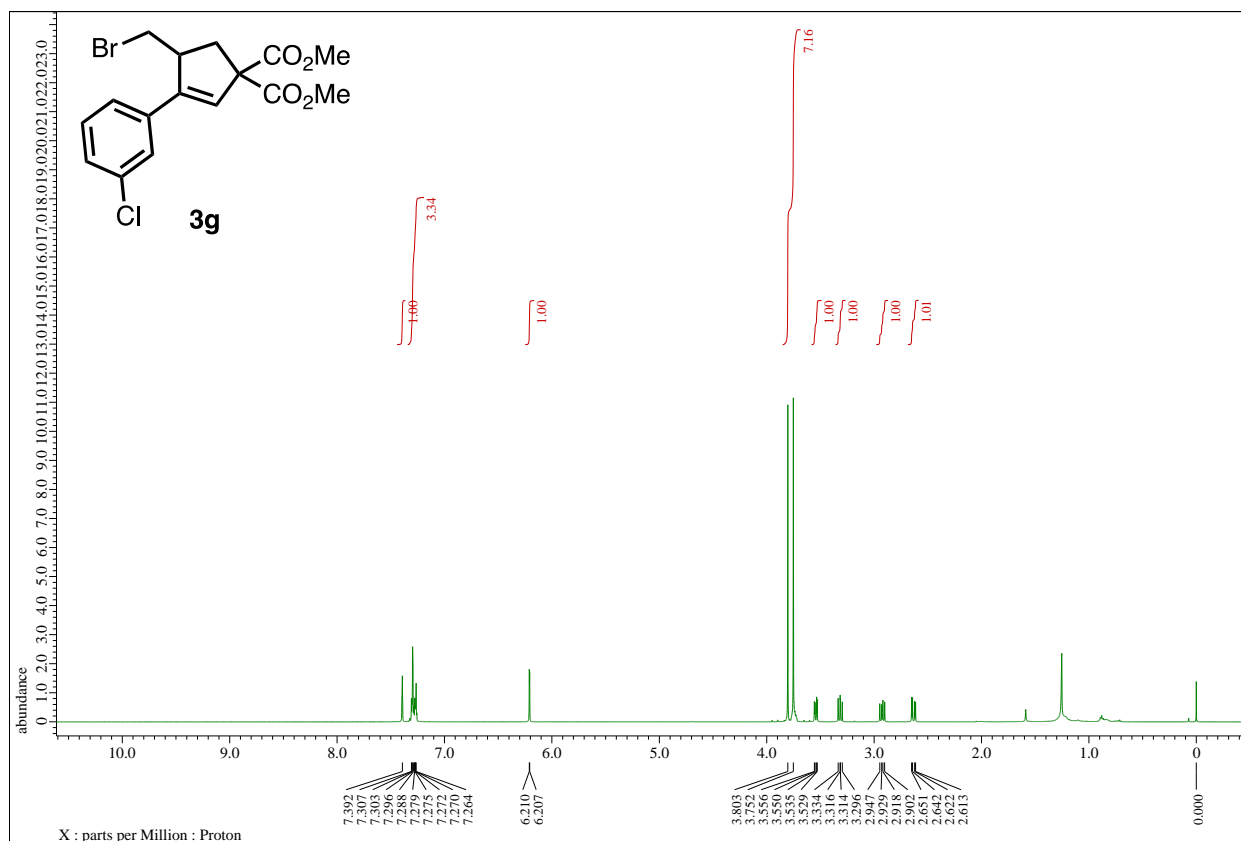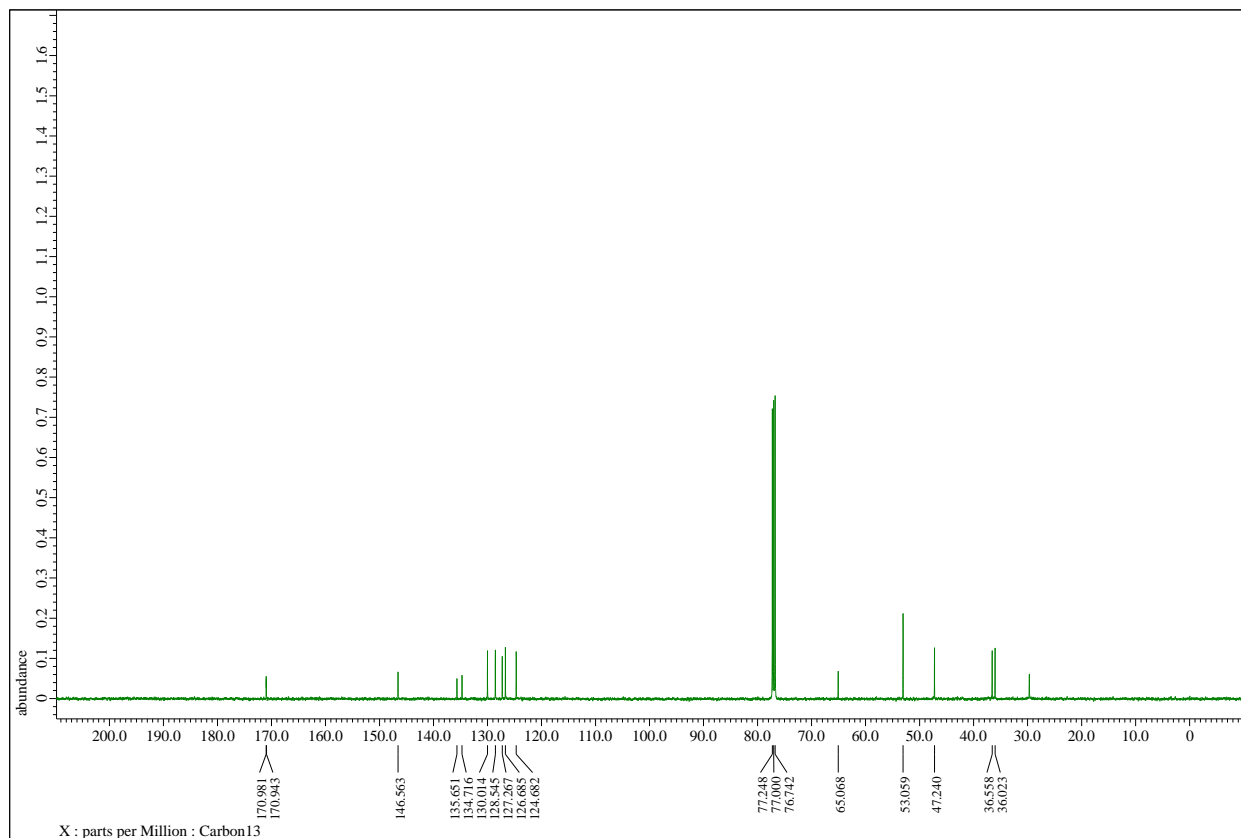

# - $^1\text{H}$ and $^{13}\text{C}$ NMR Spectra of 3h

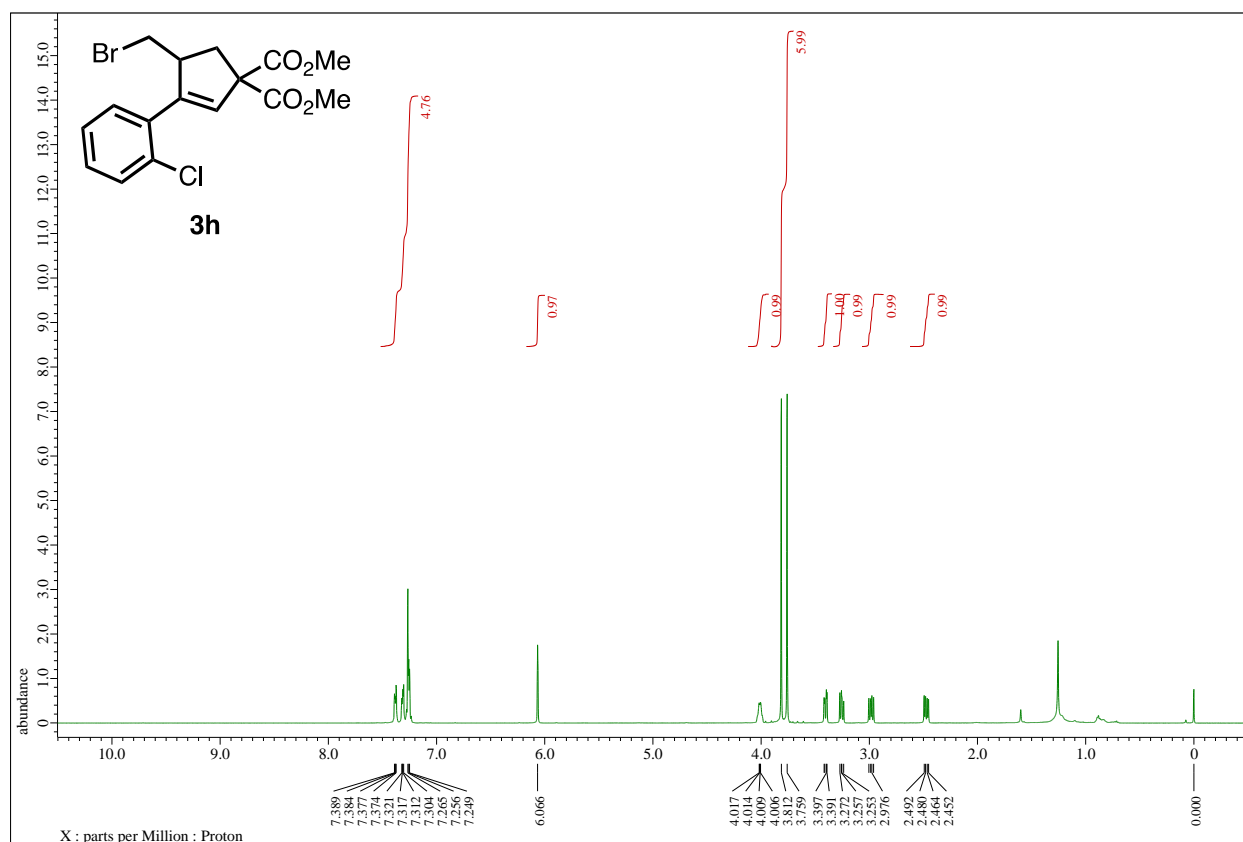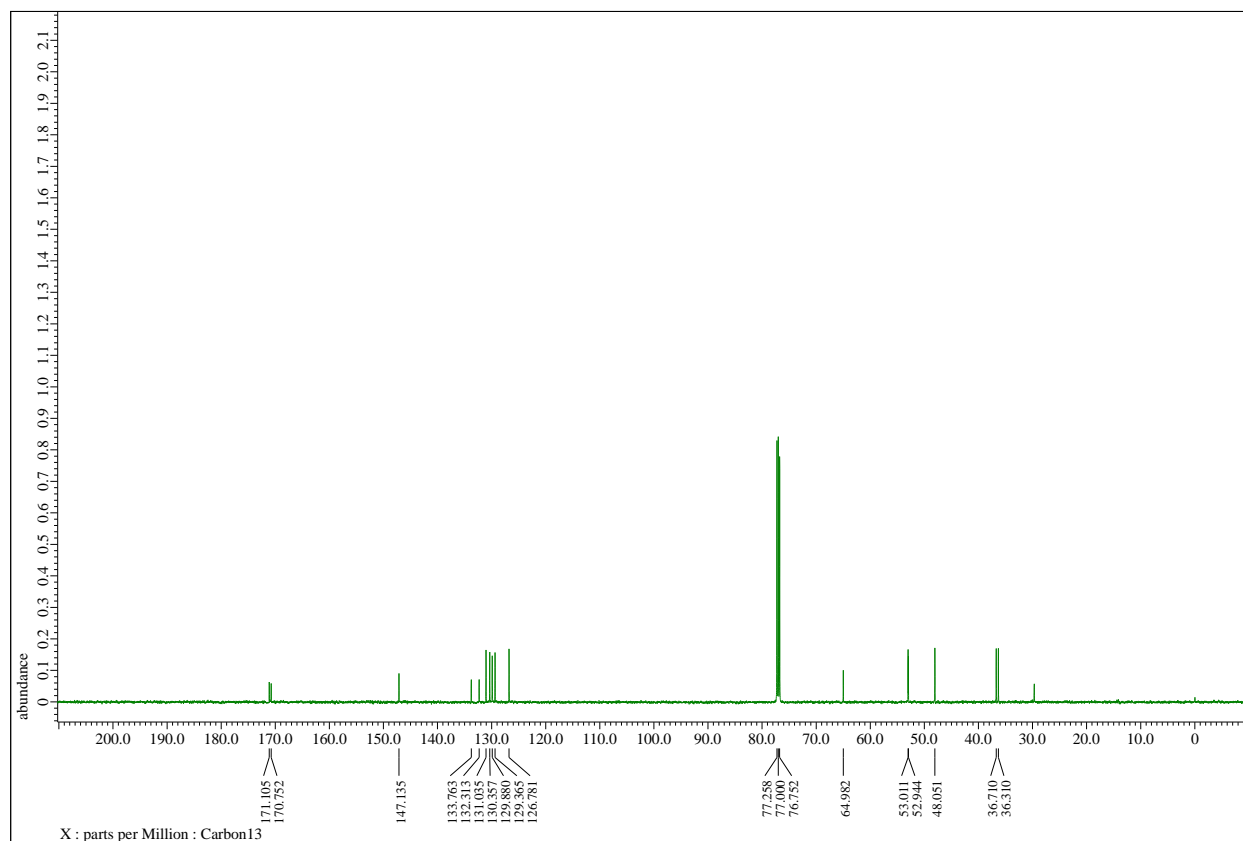

# - $^1\text{H}$ and $^{13}\text{C}$ NMR Spectra of **3i**

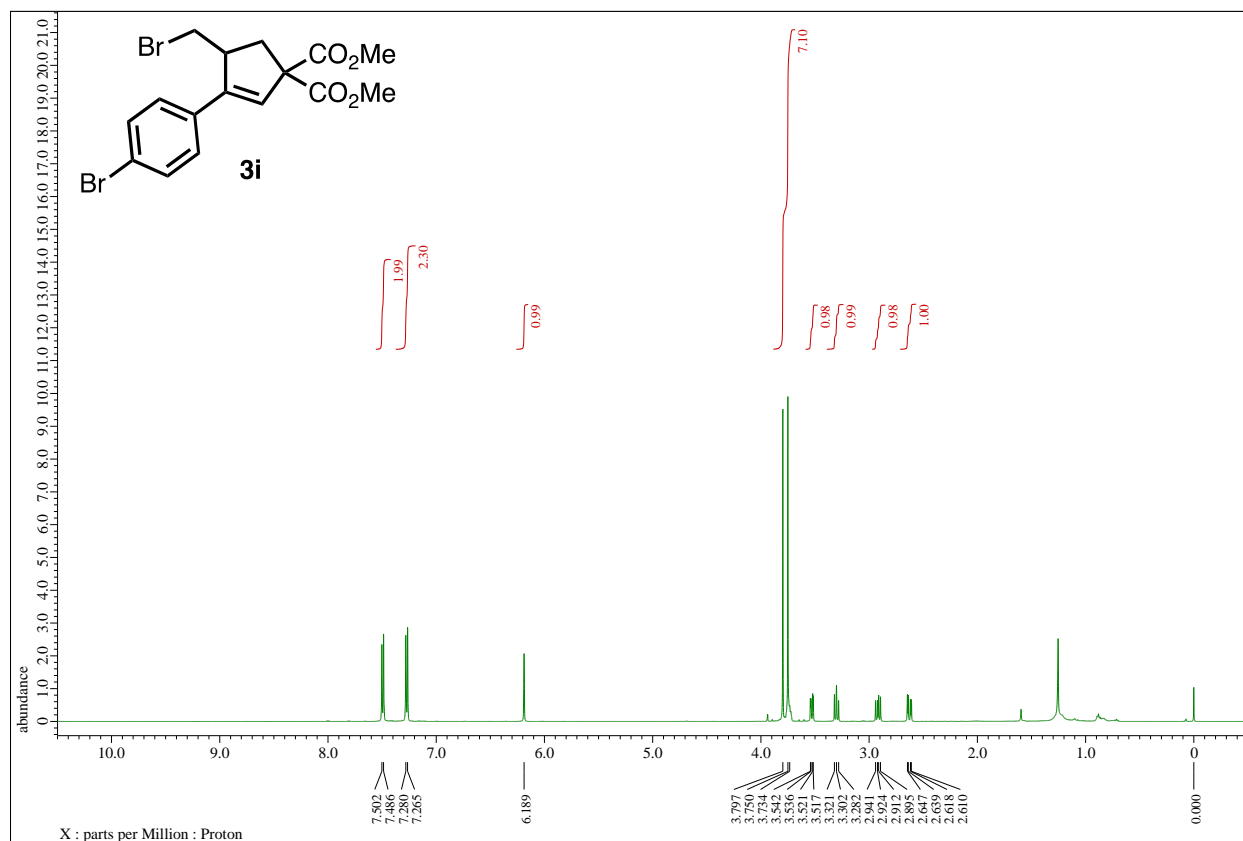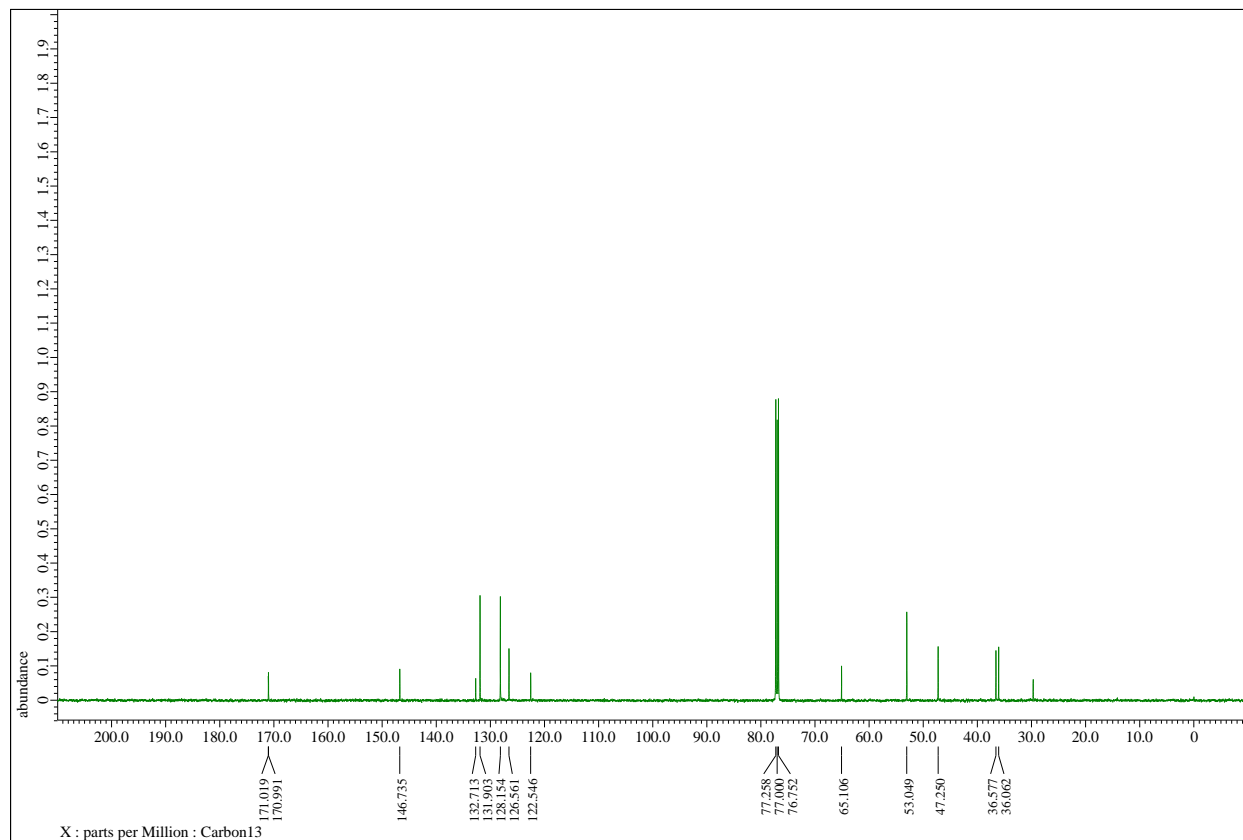

-  $^1\text{H}$ ,  $^{13}\text{C}$  and  $^{19}\text{F}$  NMR Spectra of **3j**

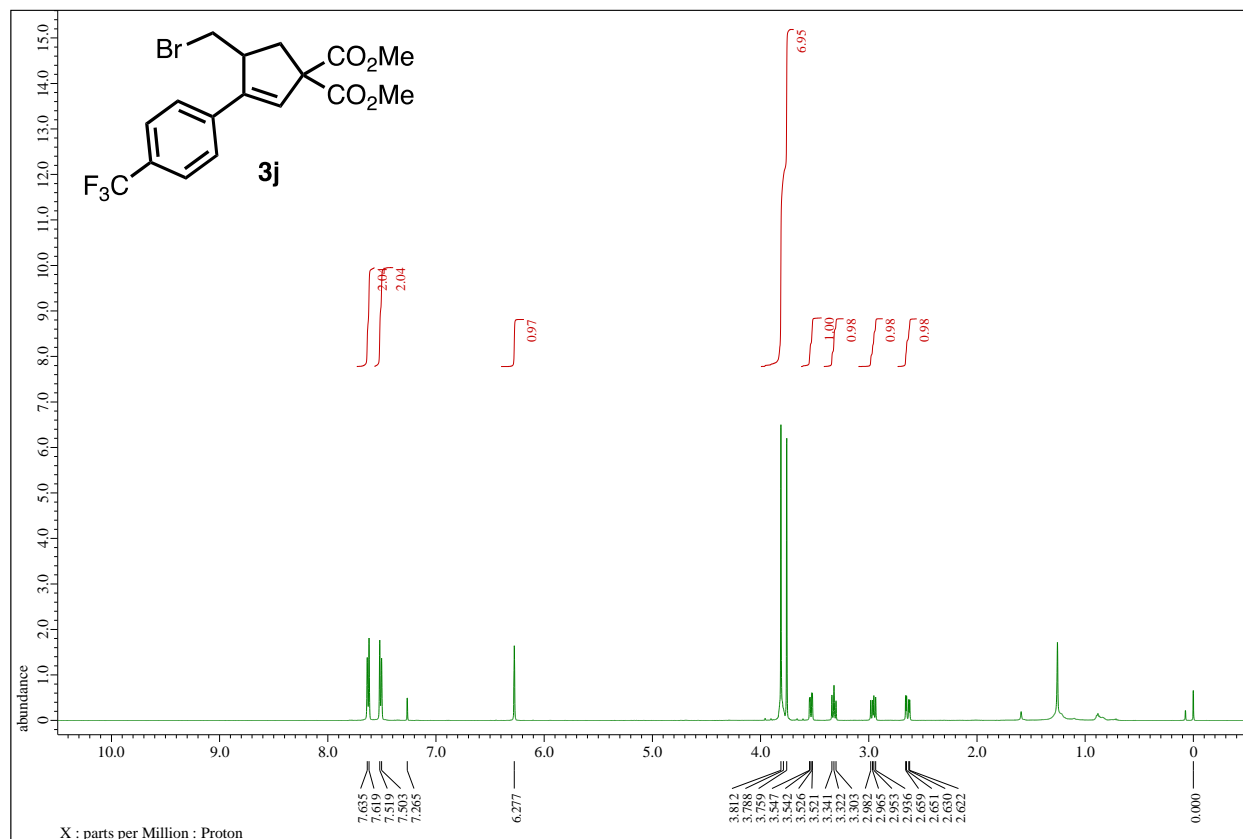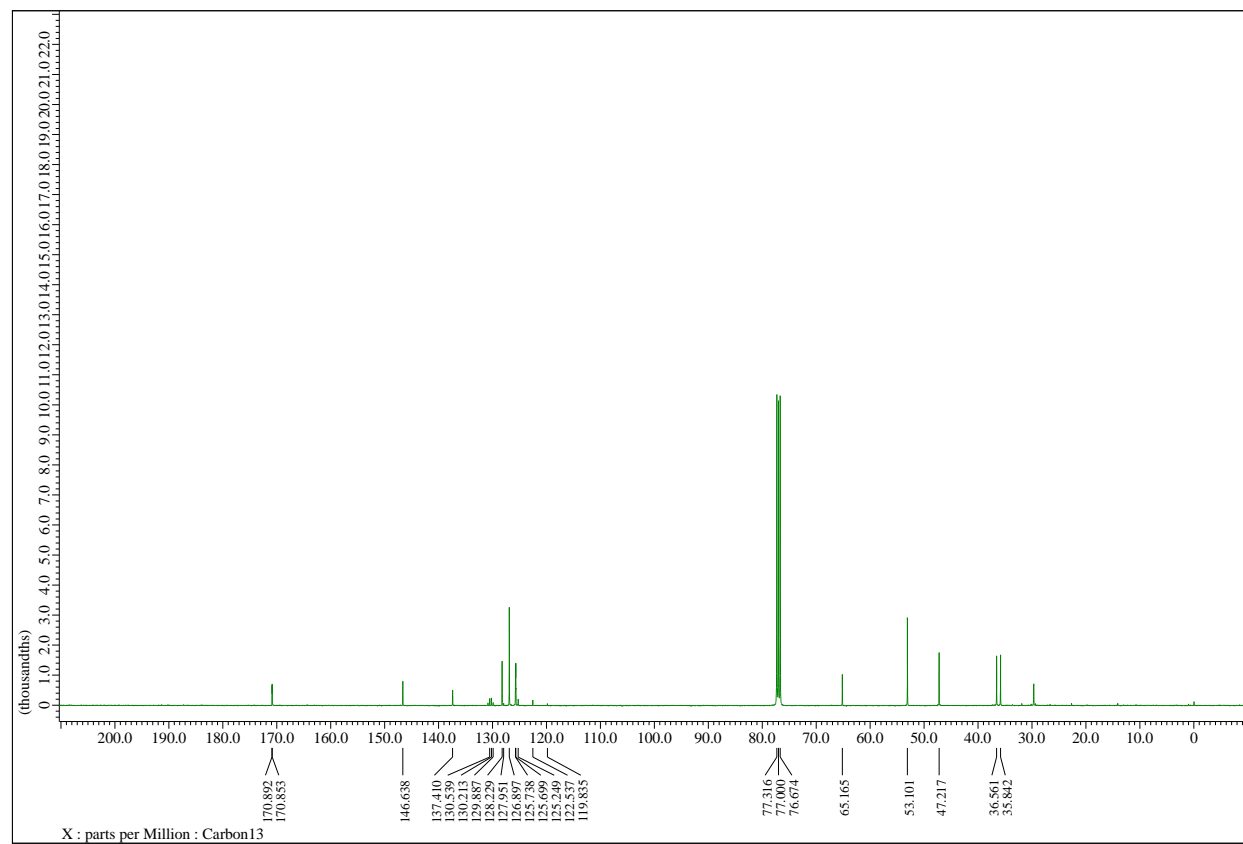

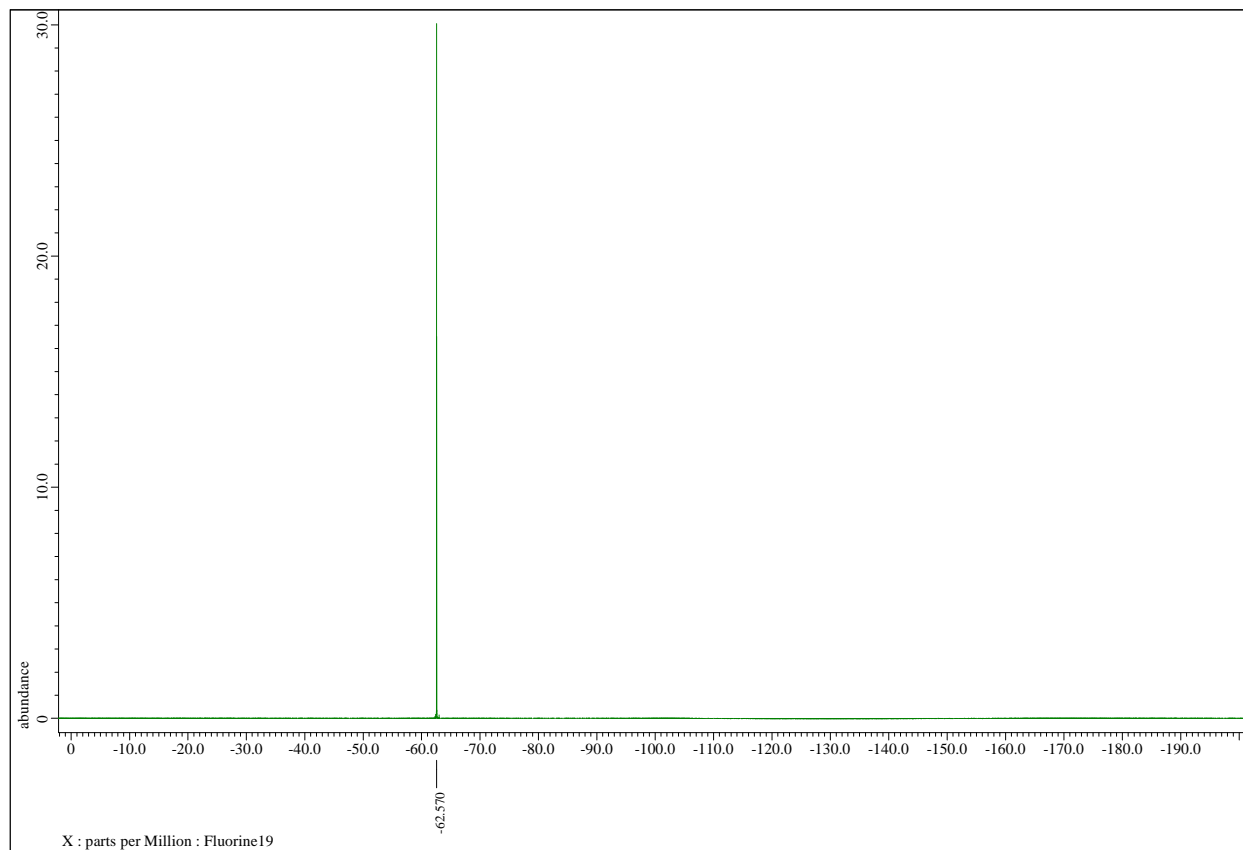

# - $^1\text{H}$ , $^{13}\text{C}$ and $^{19}\text{F}$ NMR Spectra of **3k**

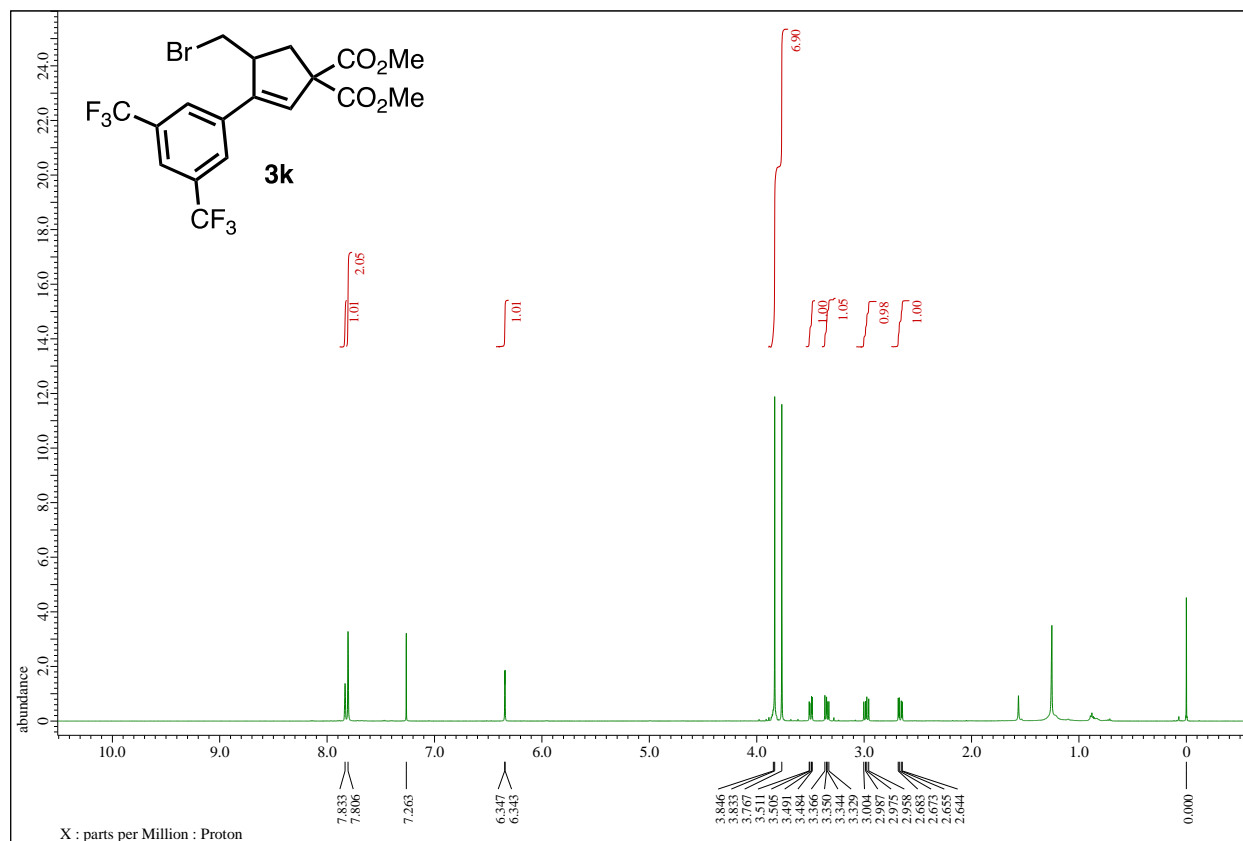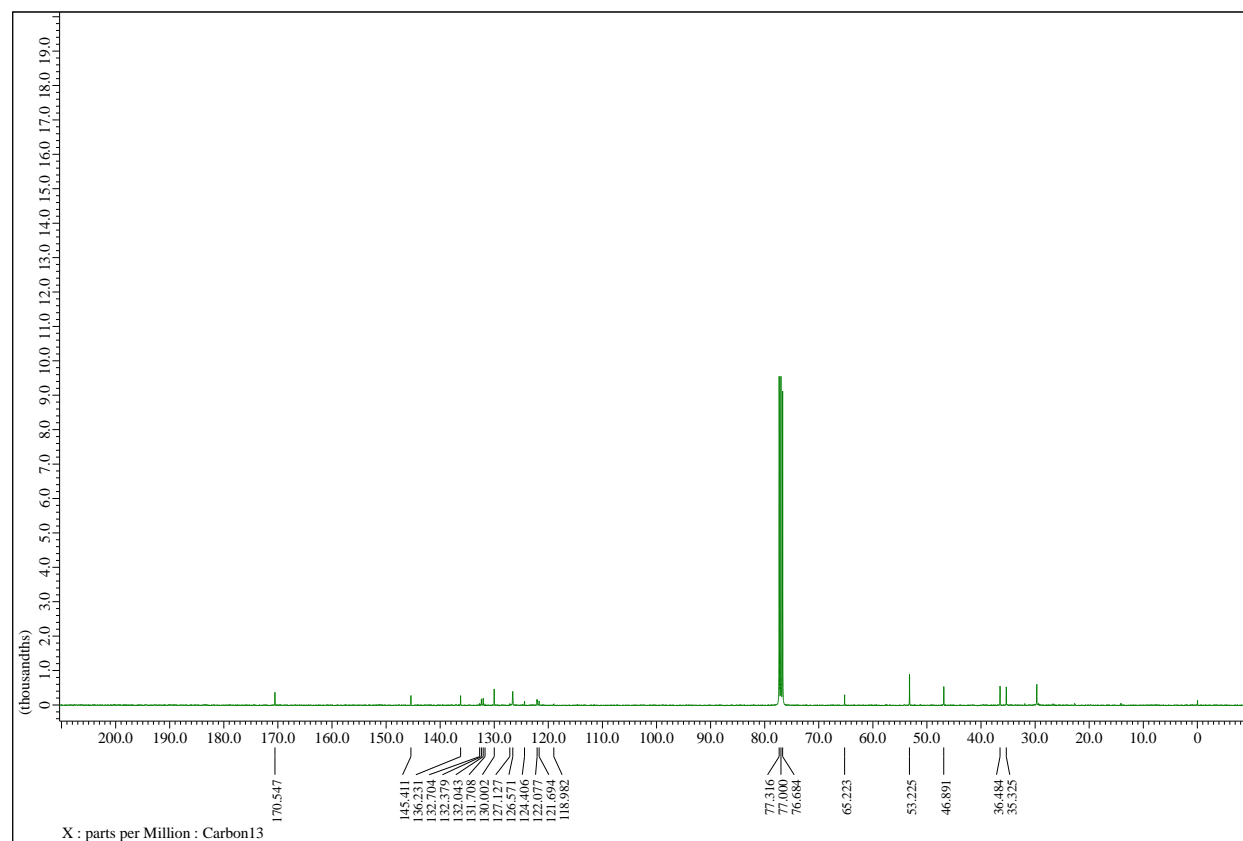

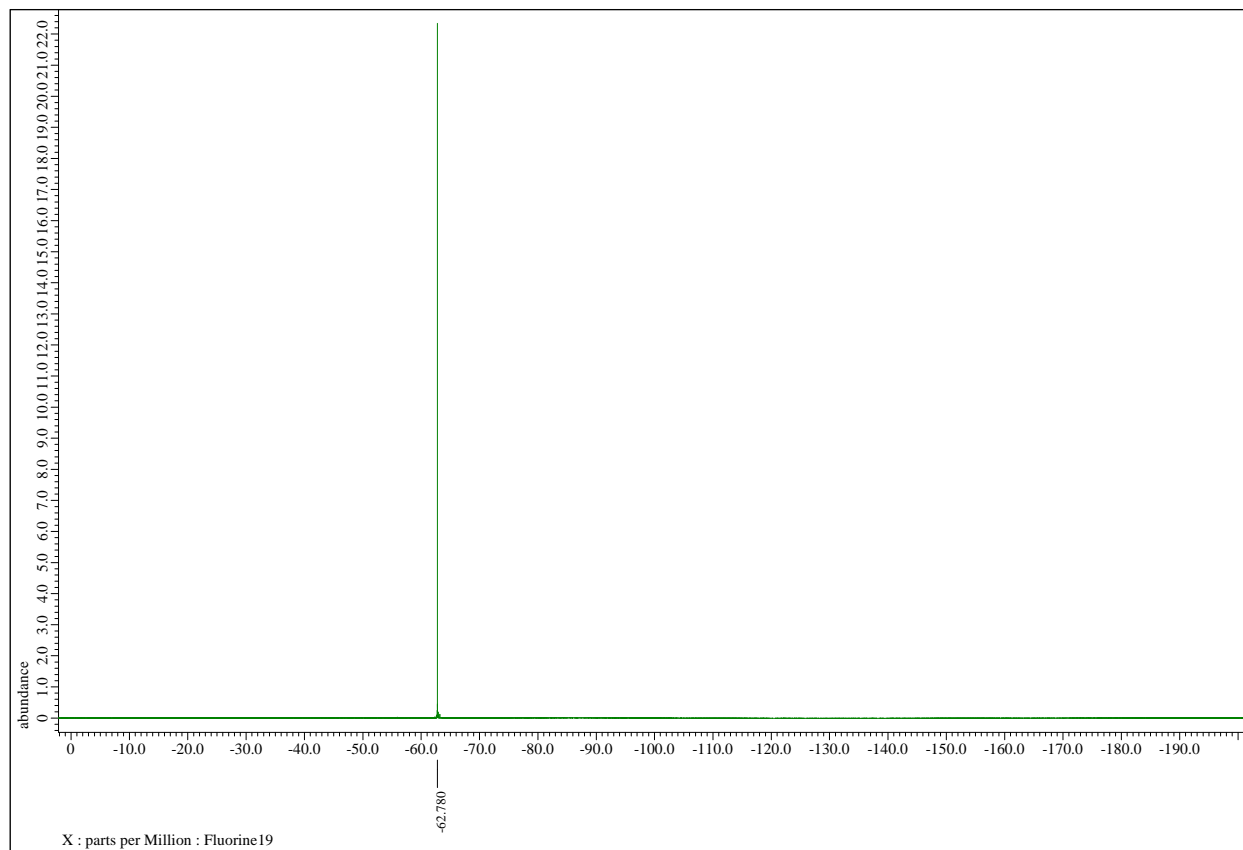



# - $^1\text{H}$ and $^{13}\text{C}$ NMR Spectra of **3l**

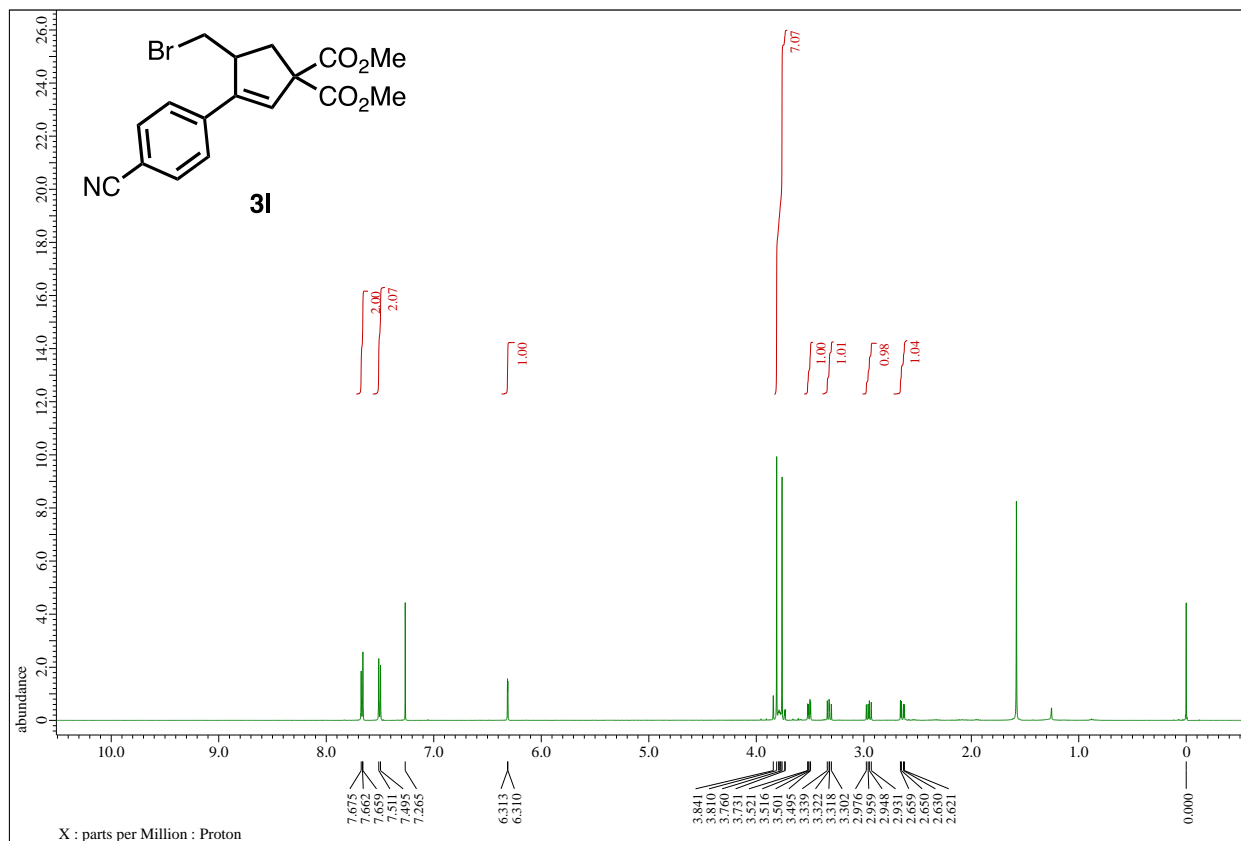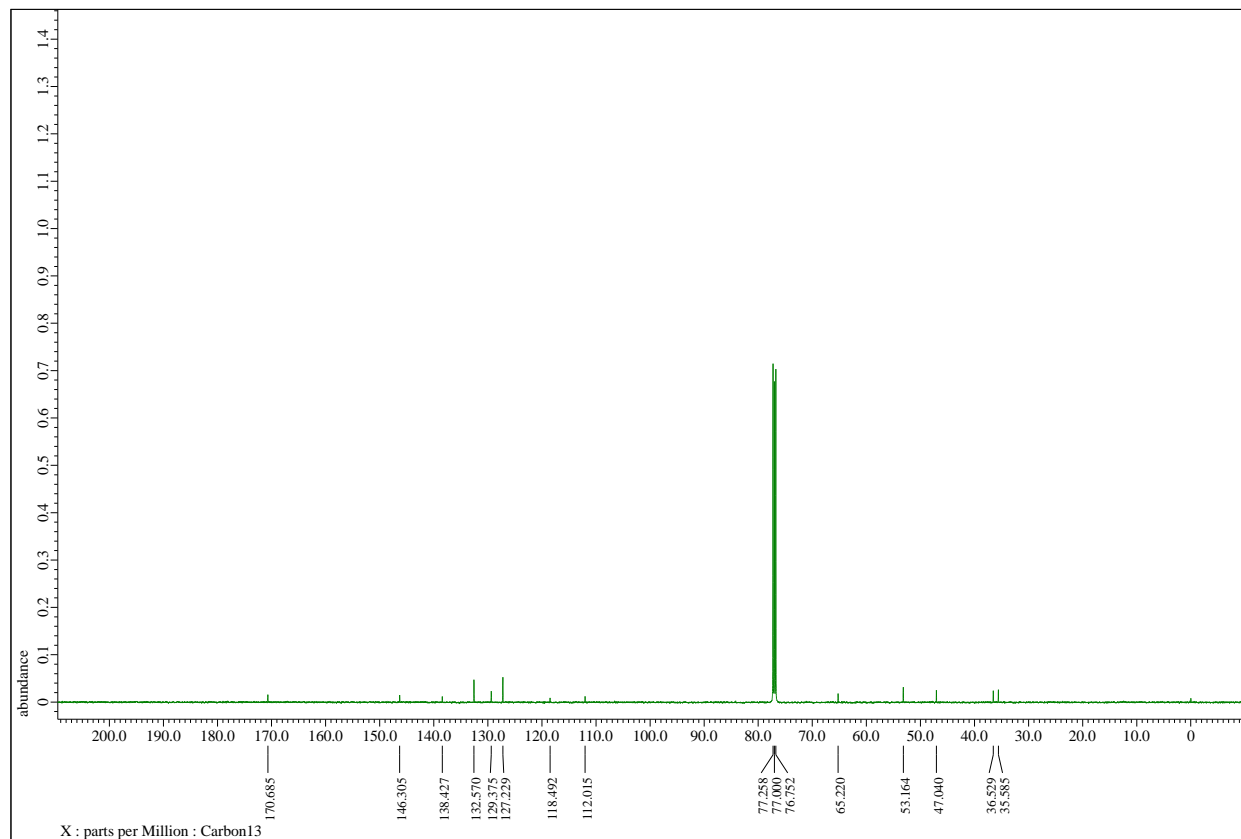

# - $^1\text{H}$ and $^{13}\text{C}$ NMR Spectra of 3m

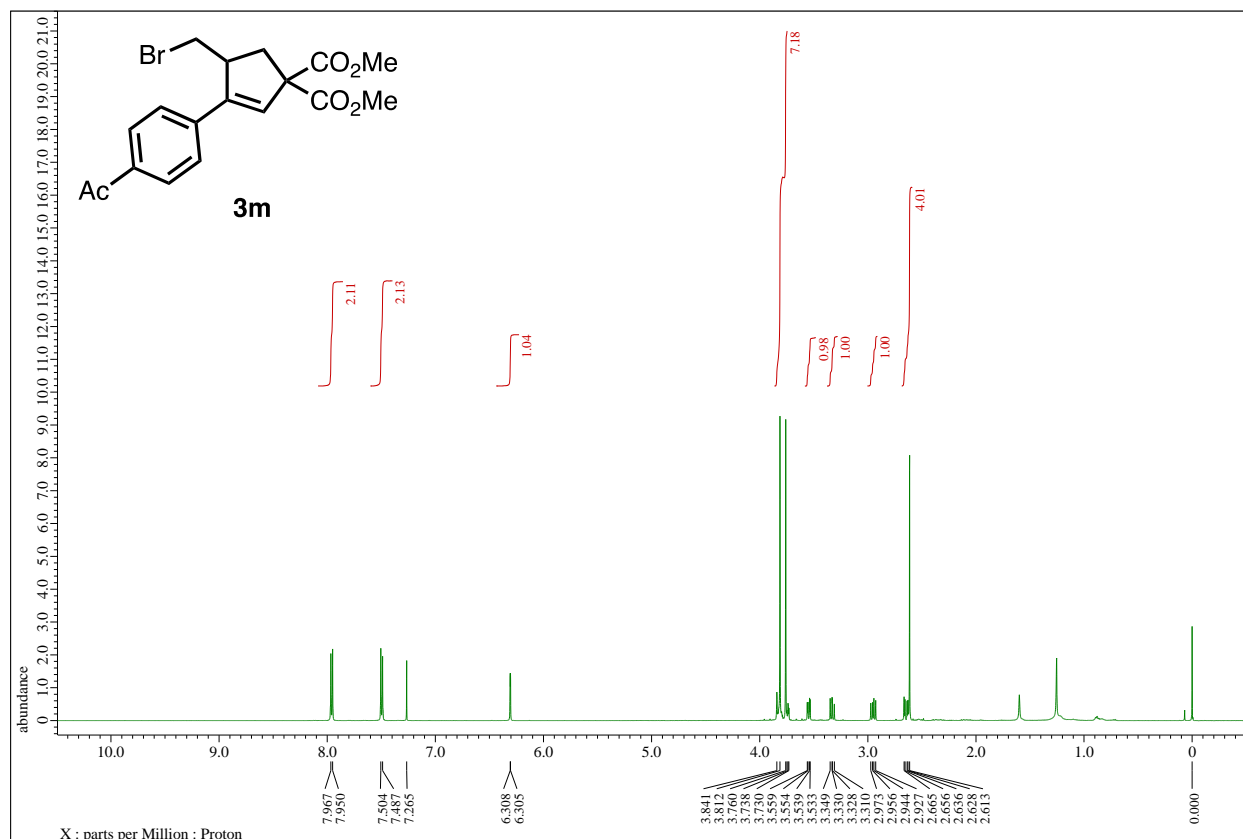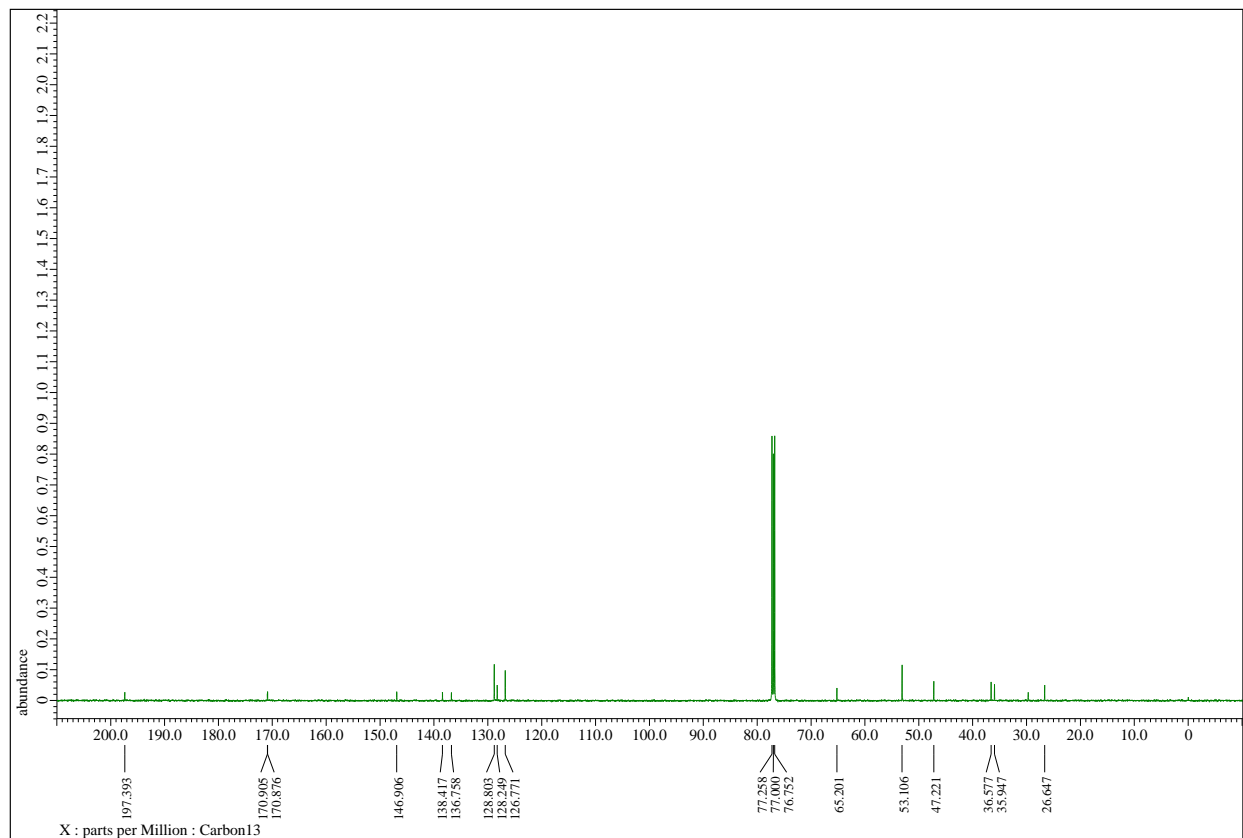

# - $^1\text{H}$ and $^{13}\text{C}$ NMR Spectra of **3n**

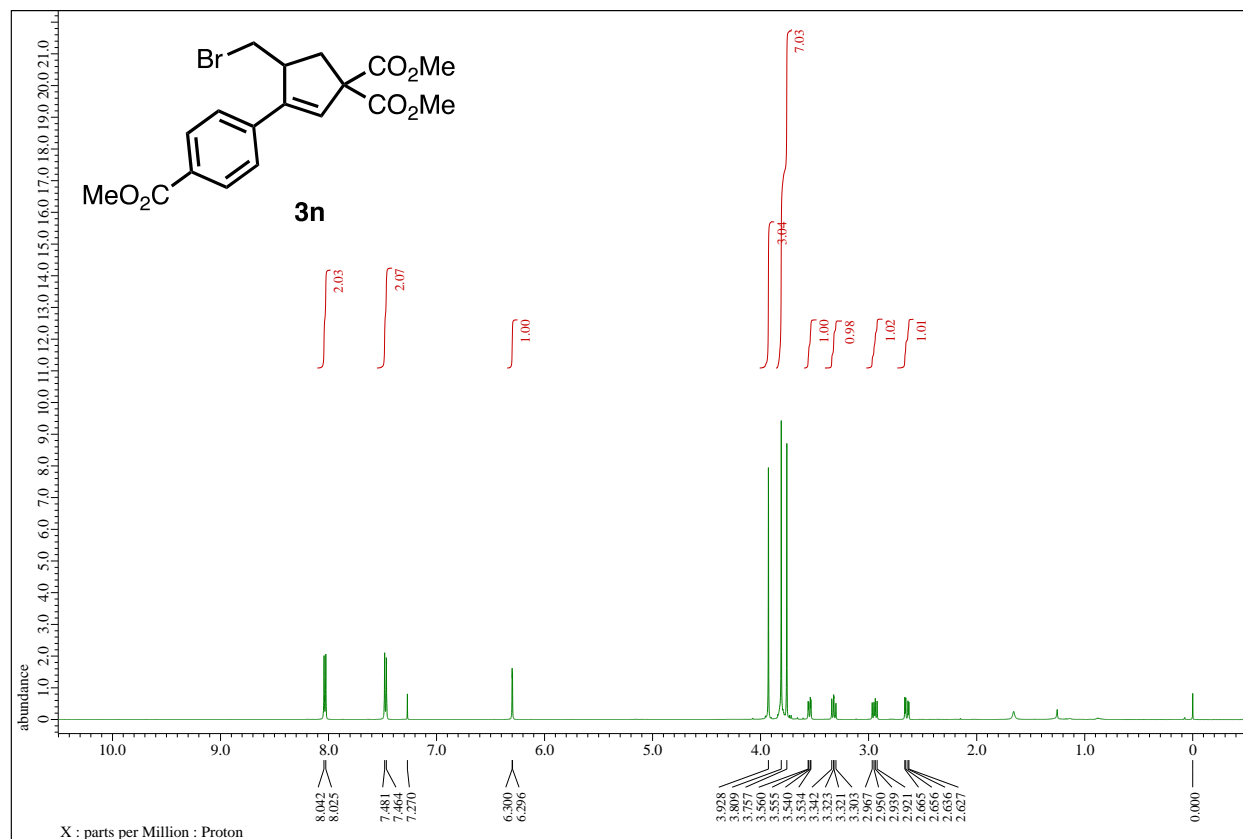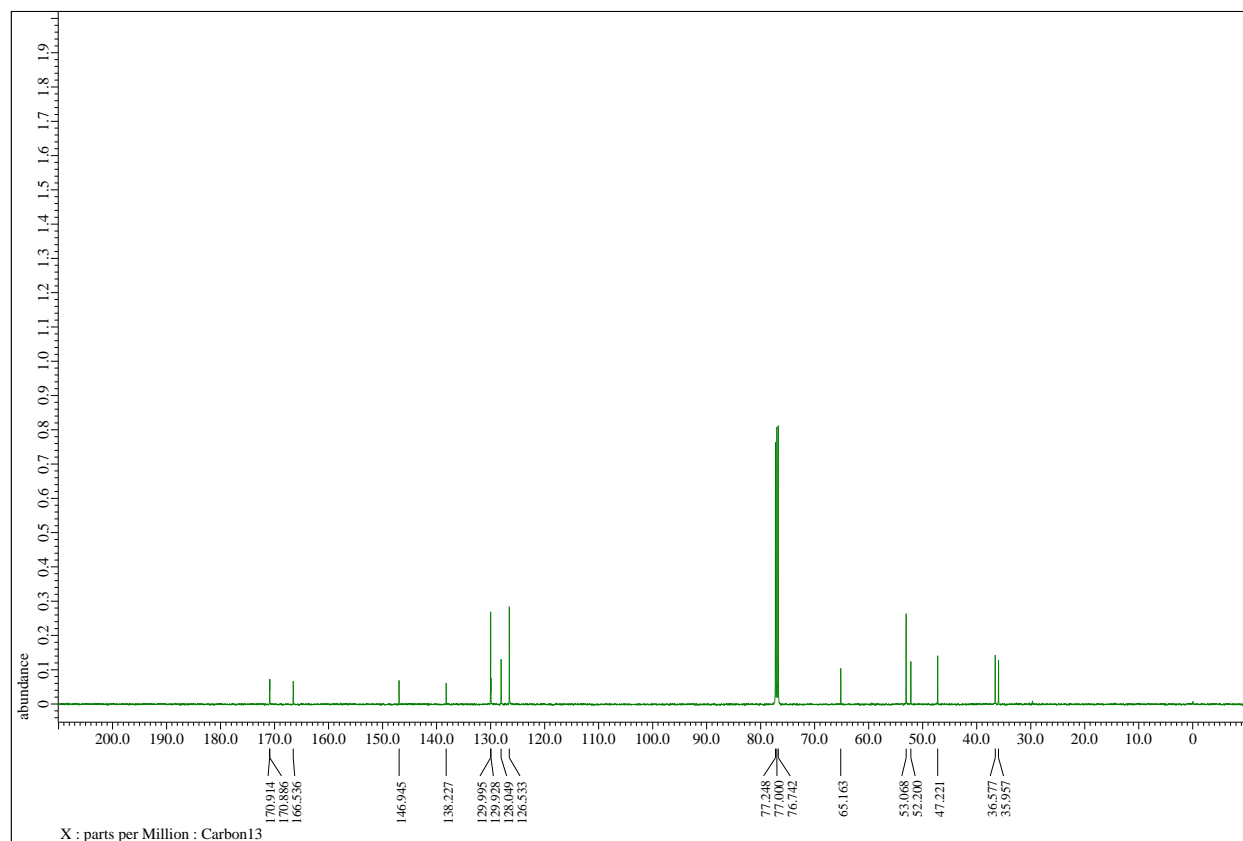

# - $^1\text{H}$ and $^{13}\text{C}$ NMR Spectra of **3o**

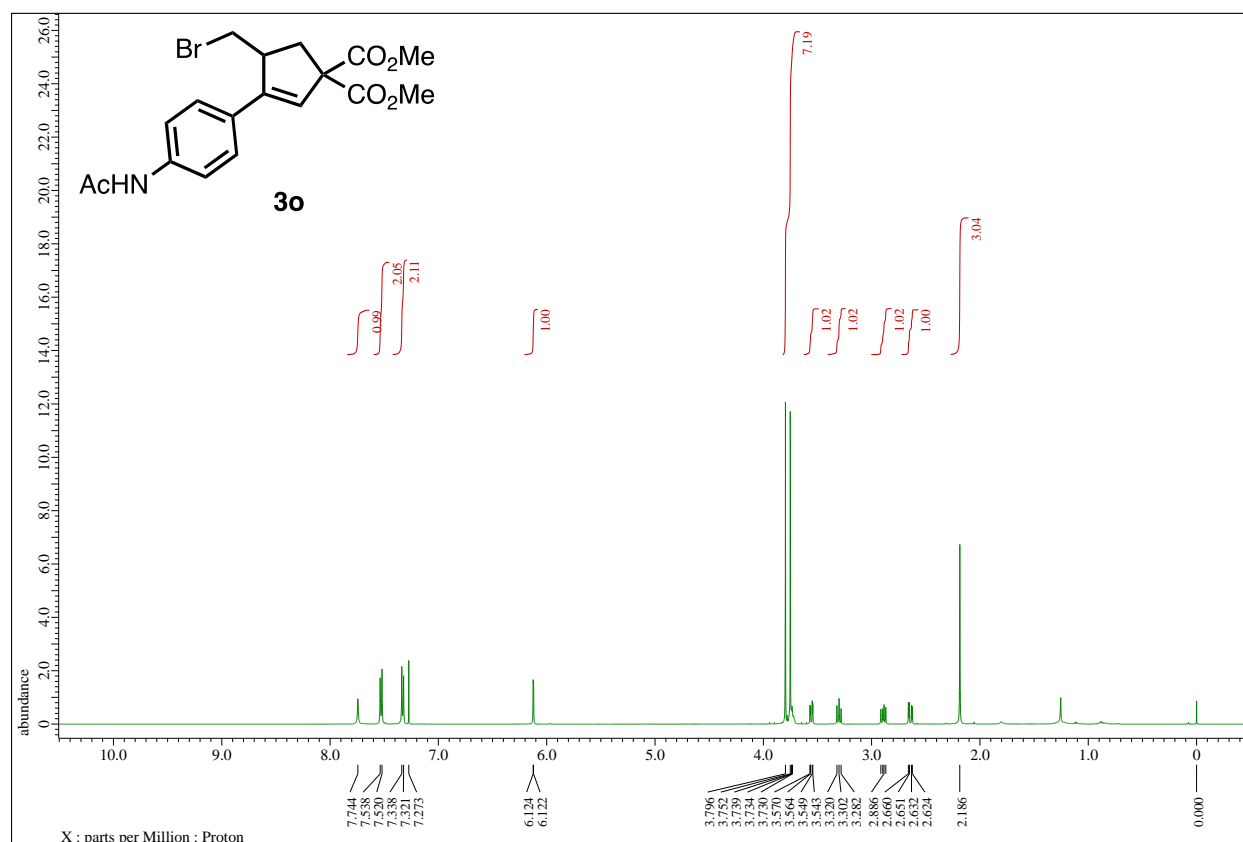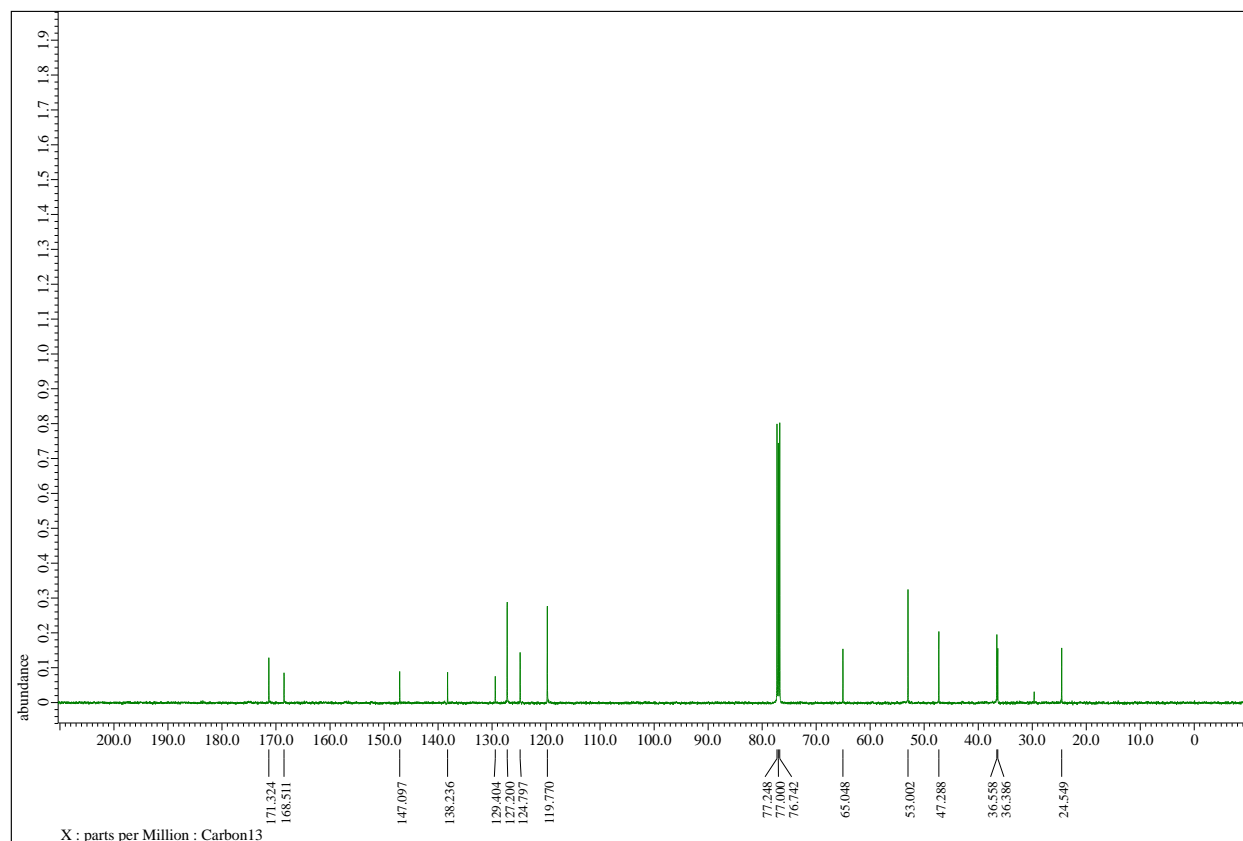

# - $^1\text{H}$ , $^{13}\text{C}$ and DEPT-135 NMR Spectra of 3p

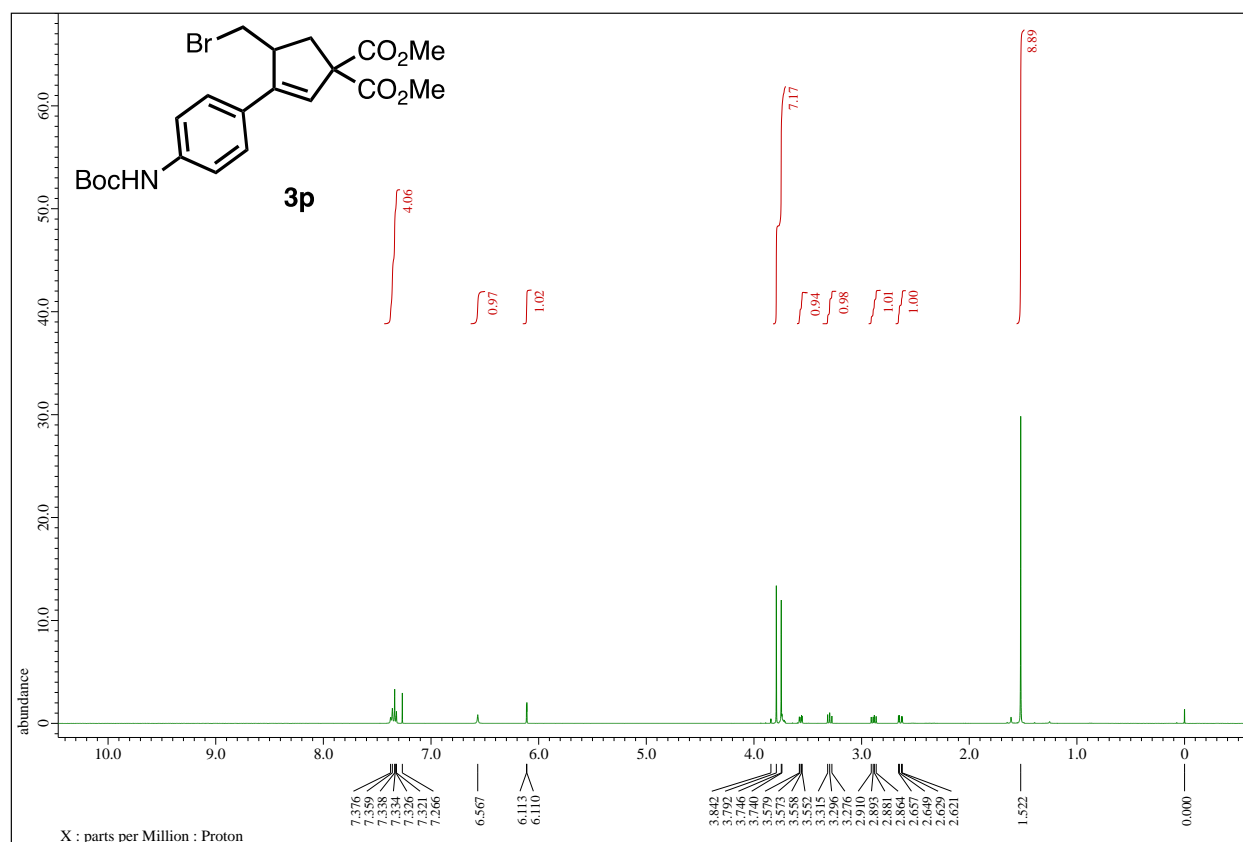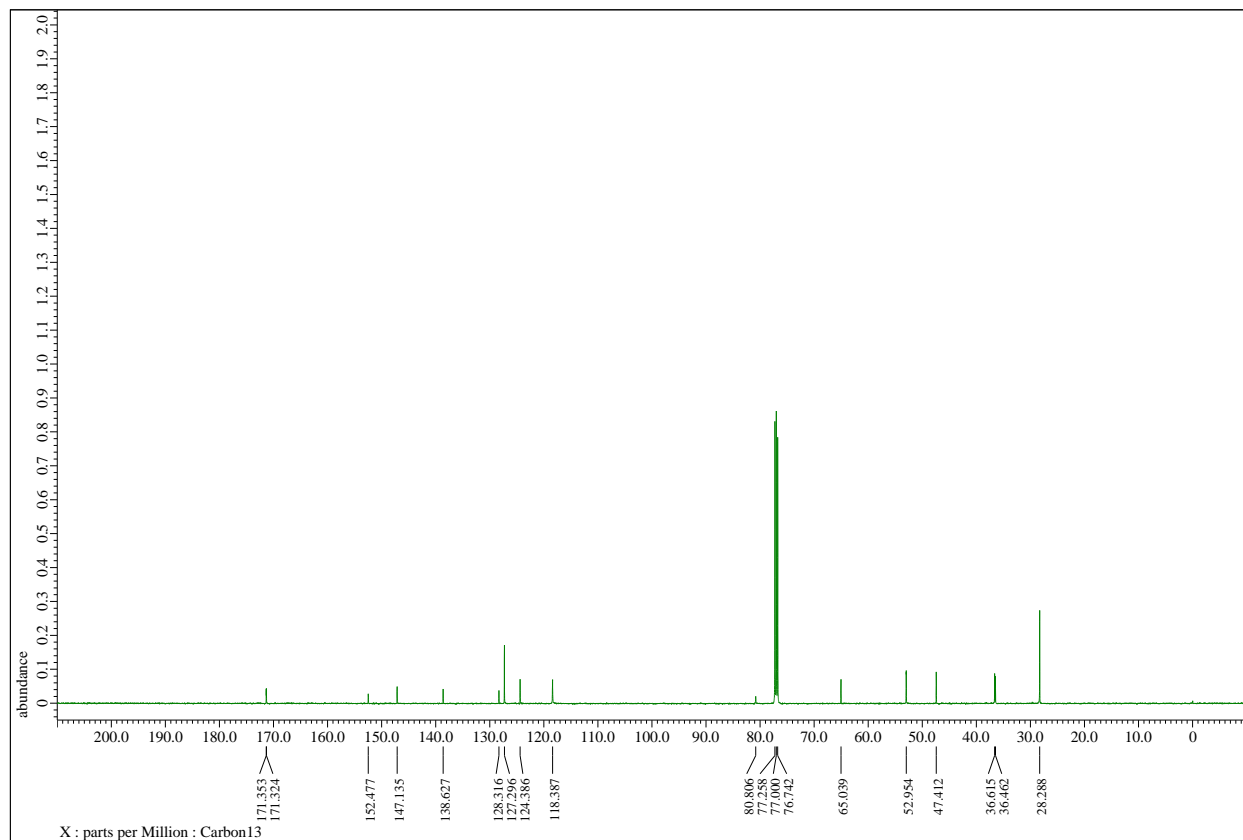

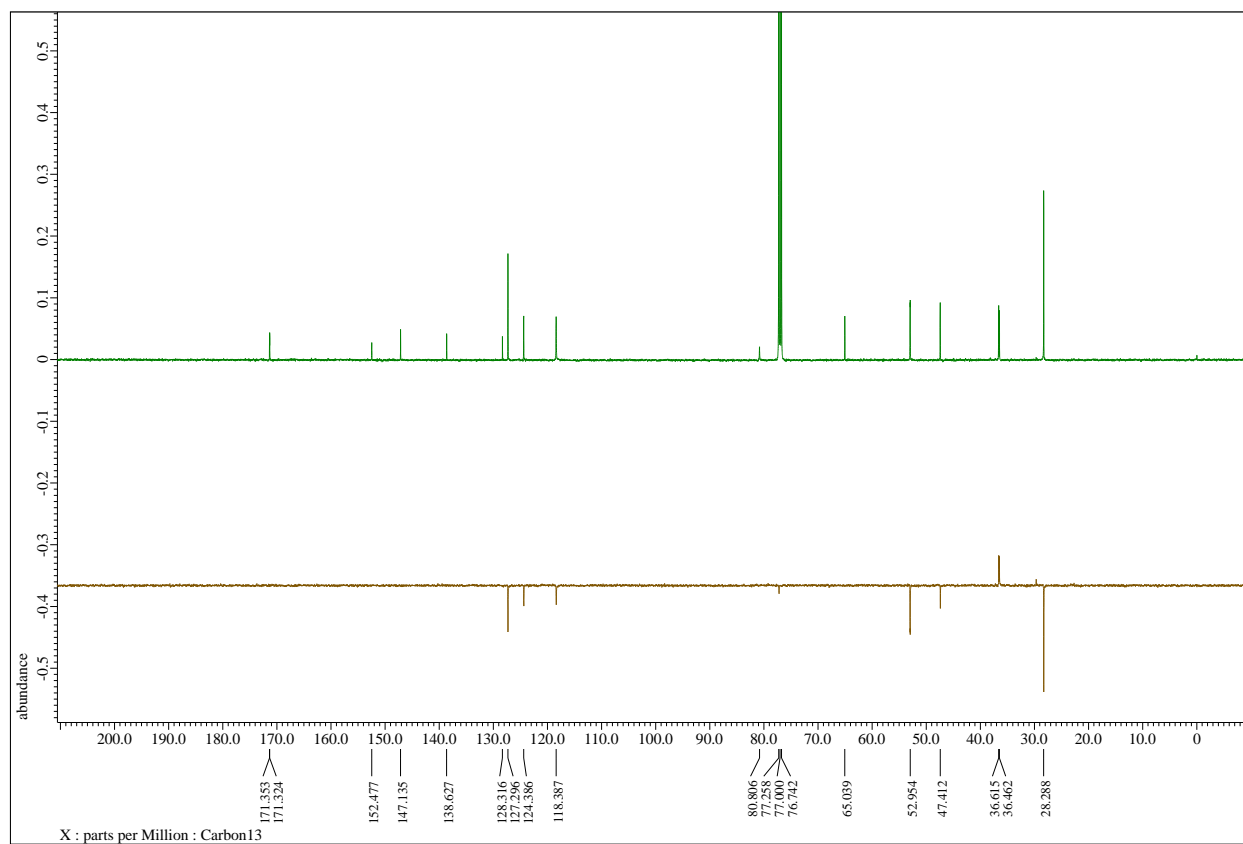

# - $^1\text{H}$ and $^{13}\text{C}$ NMR Spectra of **3q**

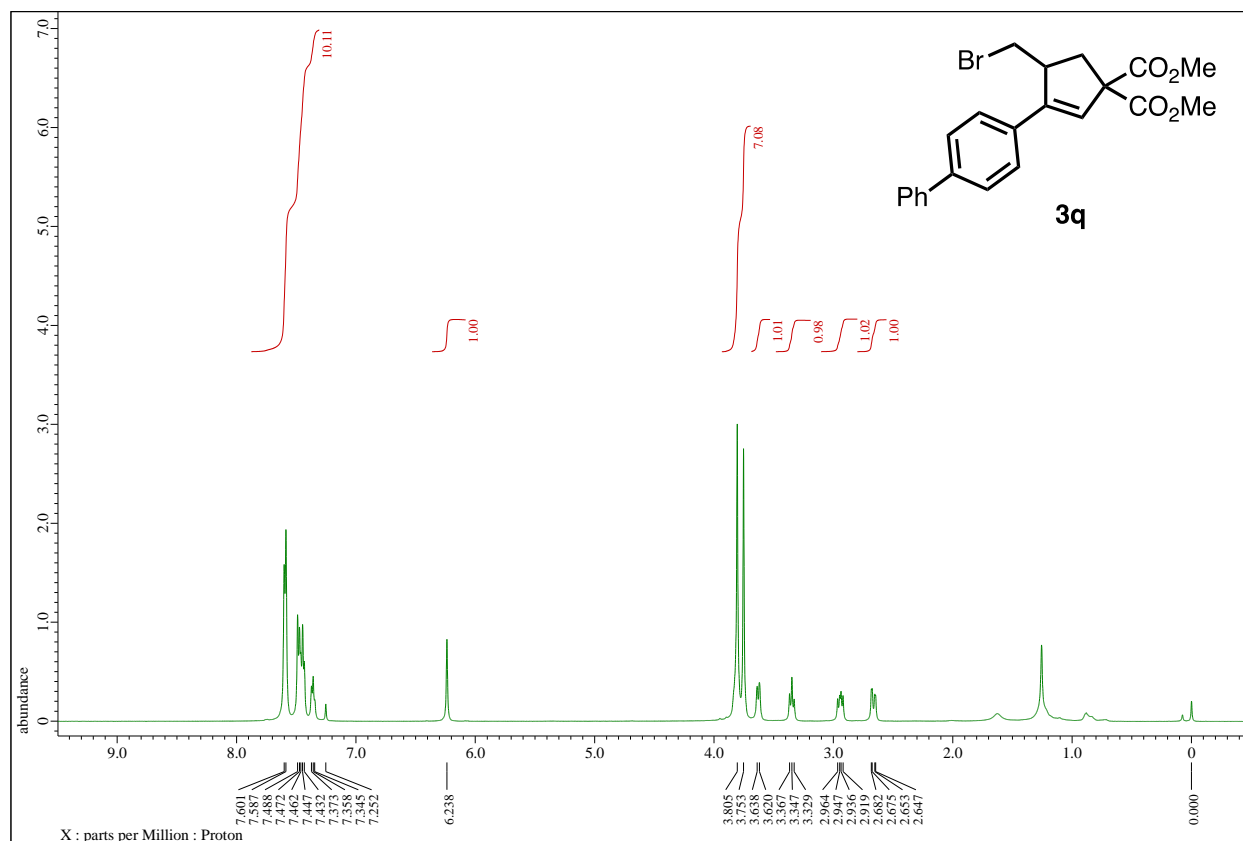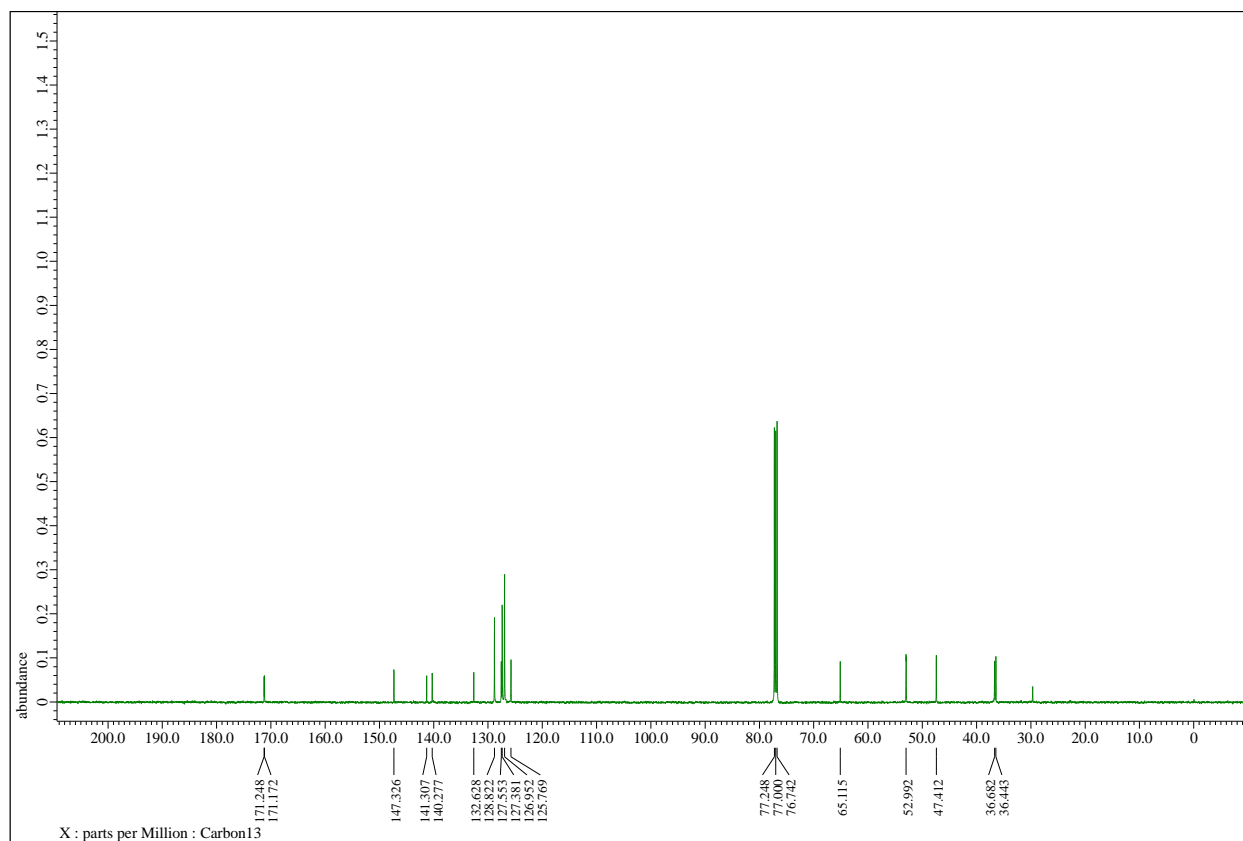

# - $^1\text{H}$ and $^{13}\text{C}$ NMR Spectra of **3r**

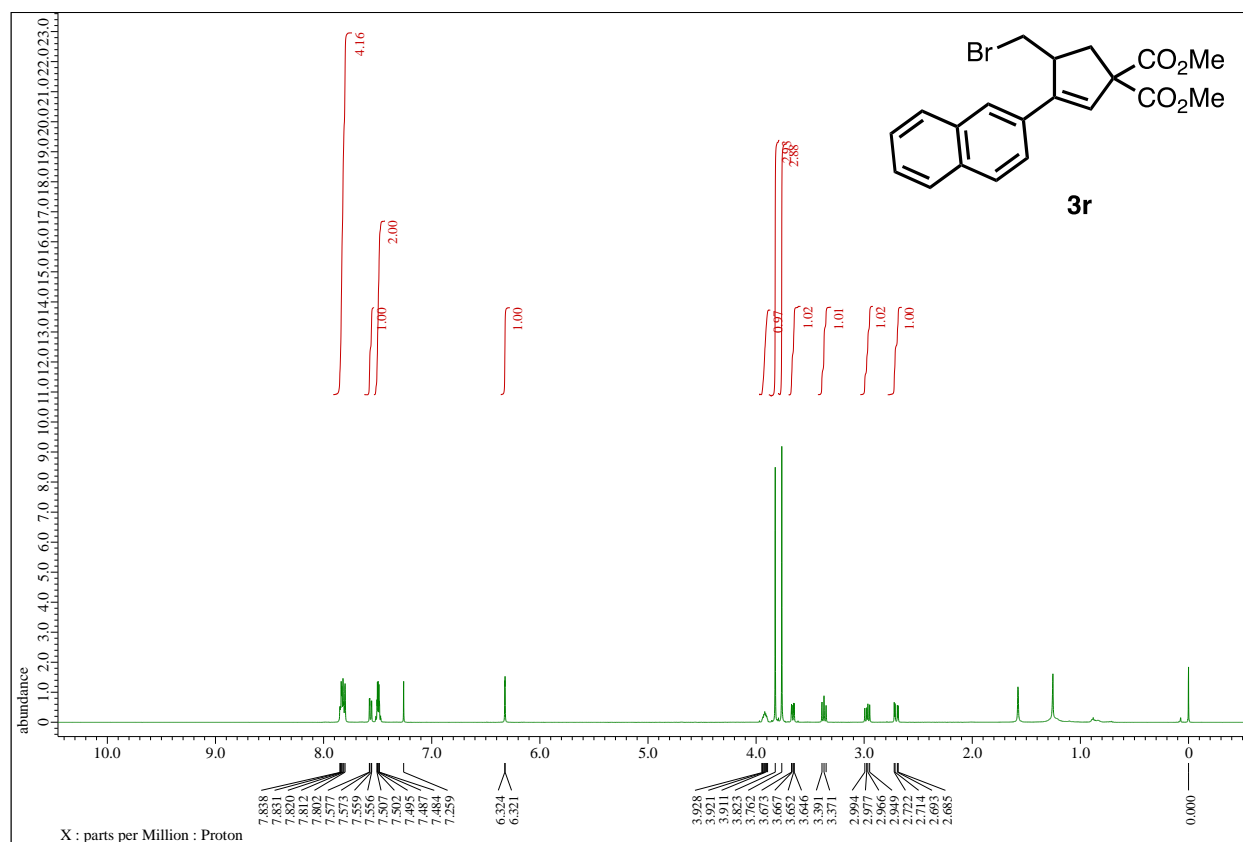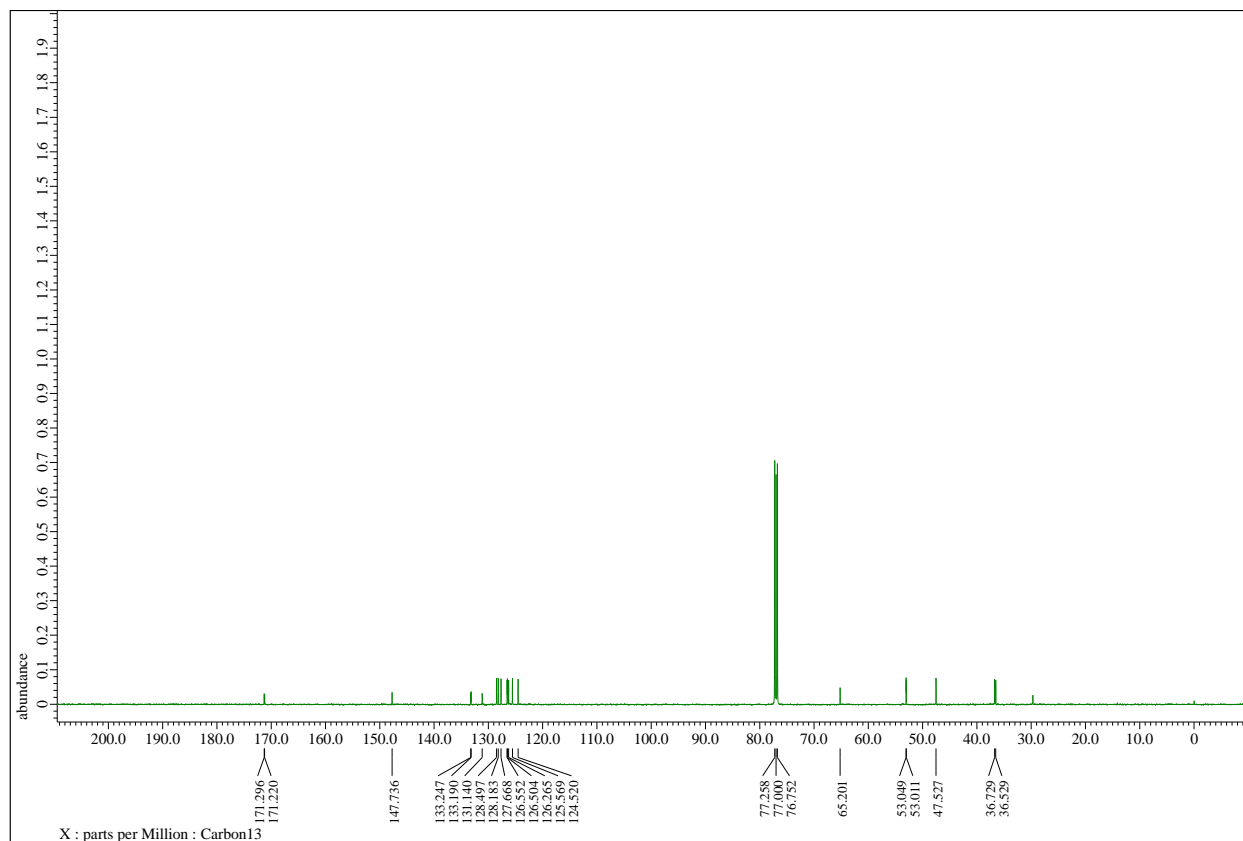



# - $^1\text{H}$ , $^{13}\text{C}$ and DEPT-135 NMR Spectra of **3s**

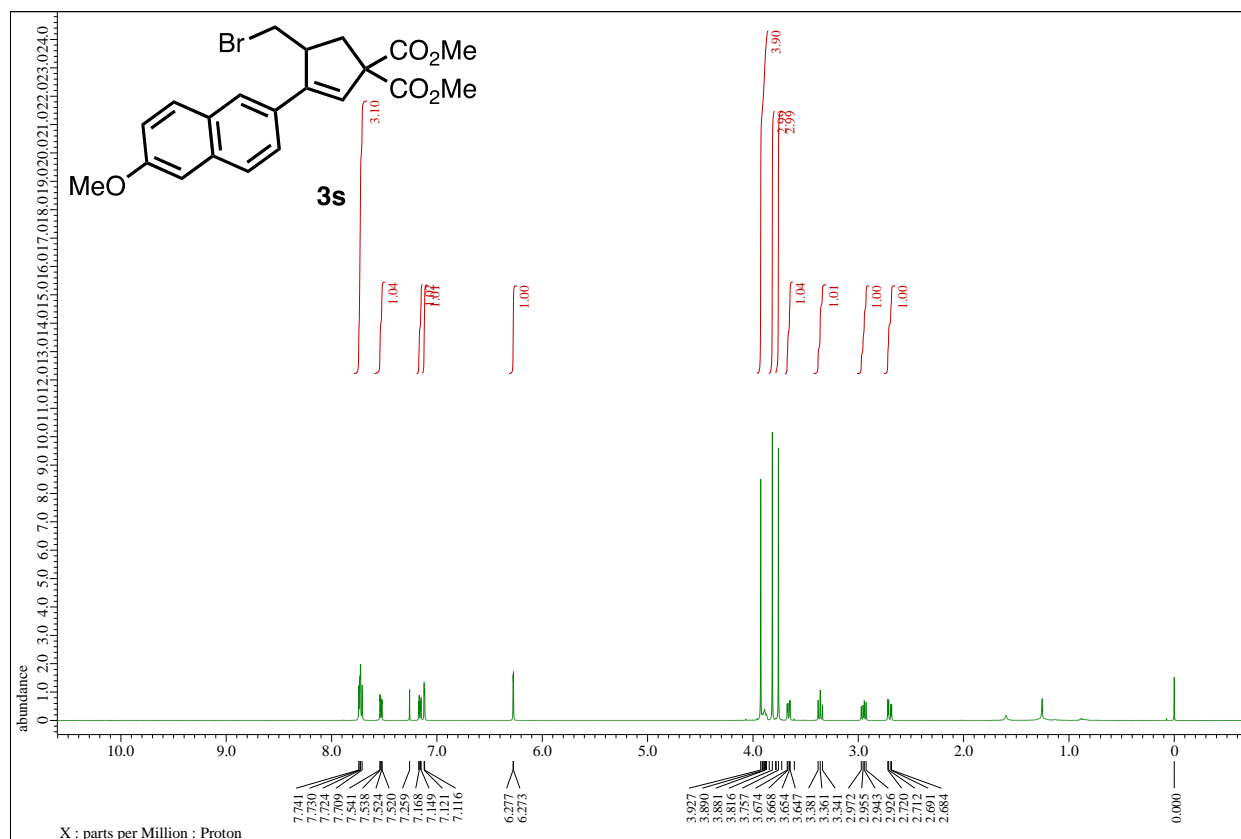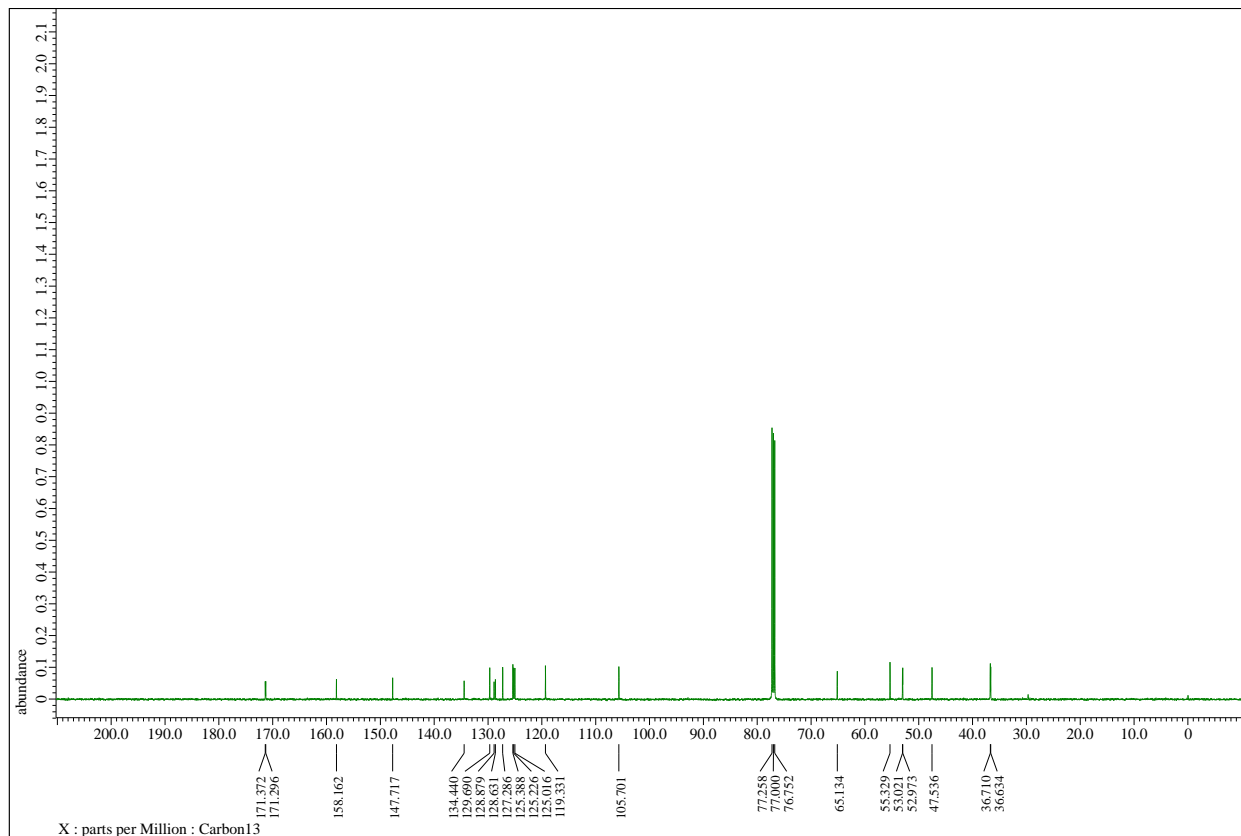

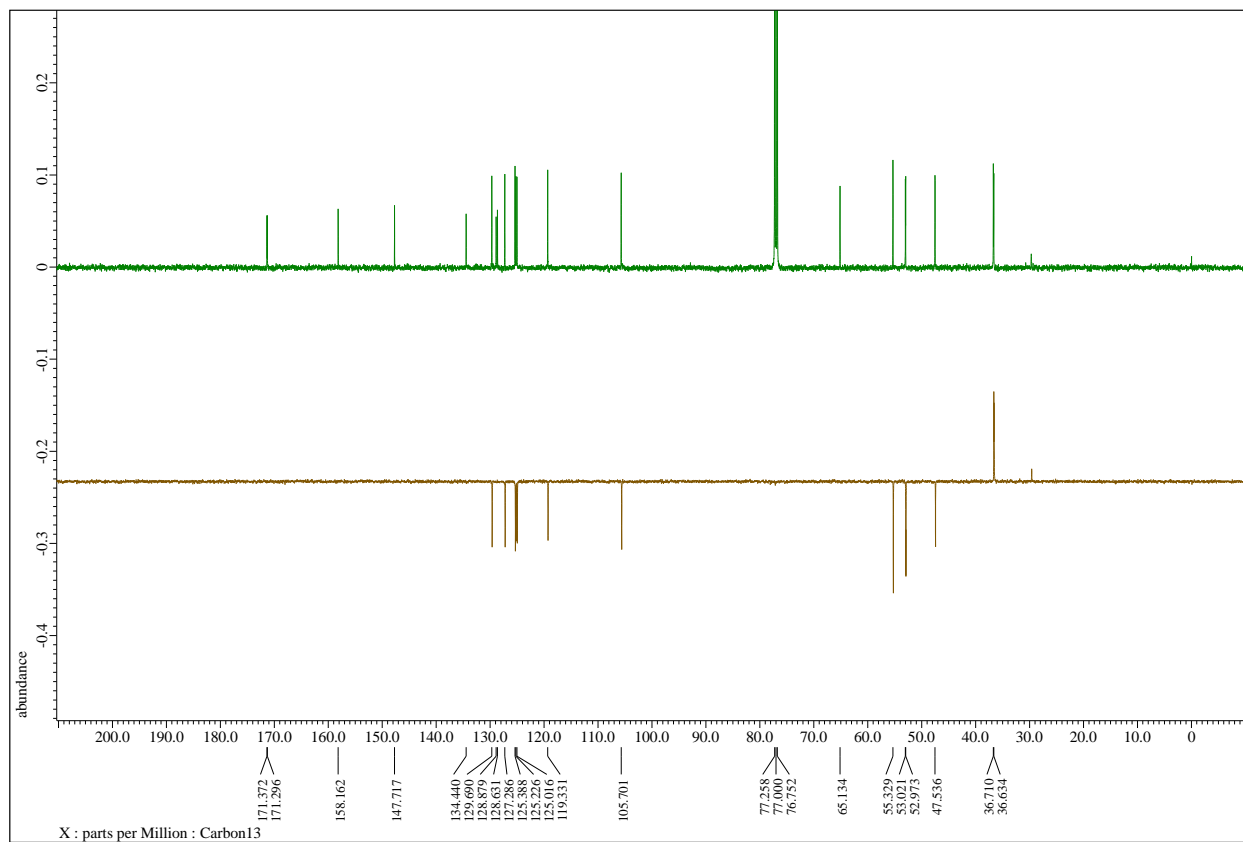

# - $^1\text{H}$ and $^{13}\text{C}$ NMR Spectra of **3t**

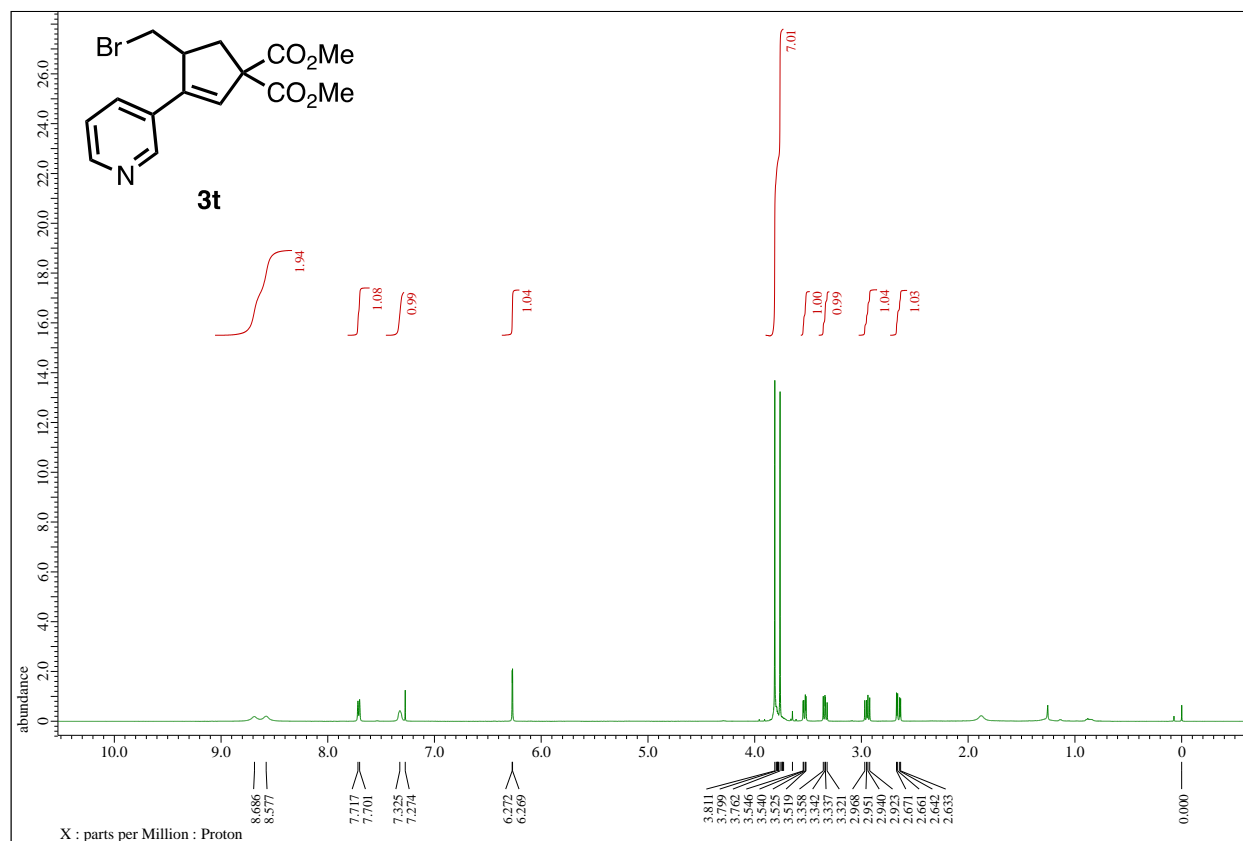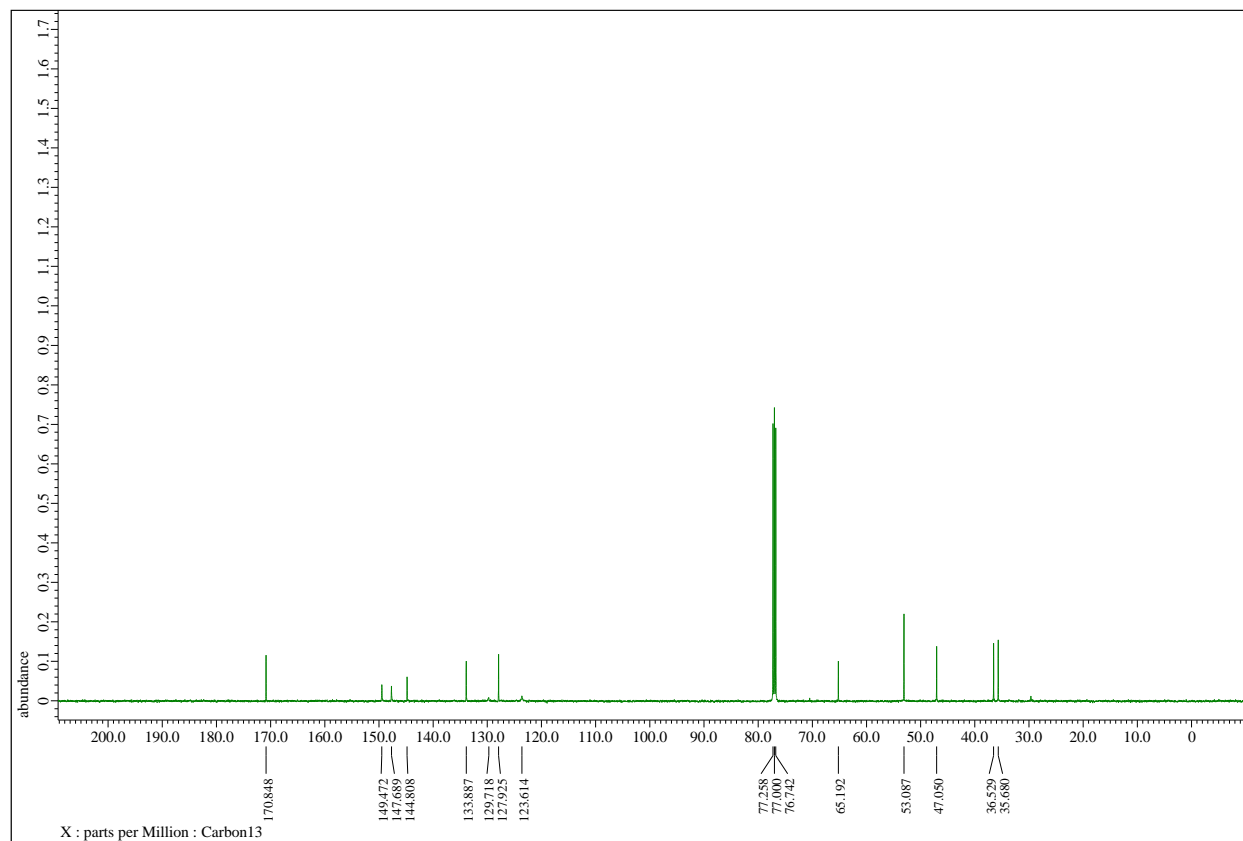

# - $^1\text{H}$ and $^{13}\text{C}$ NMR Spectra of **3u**

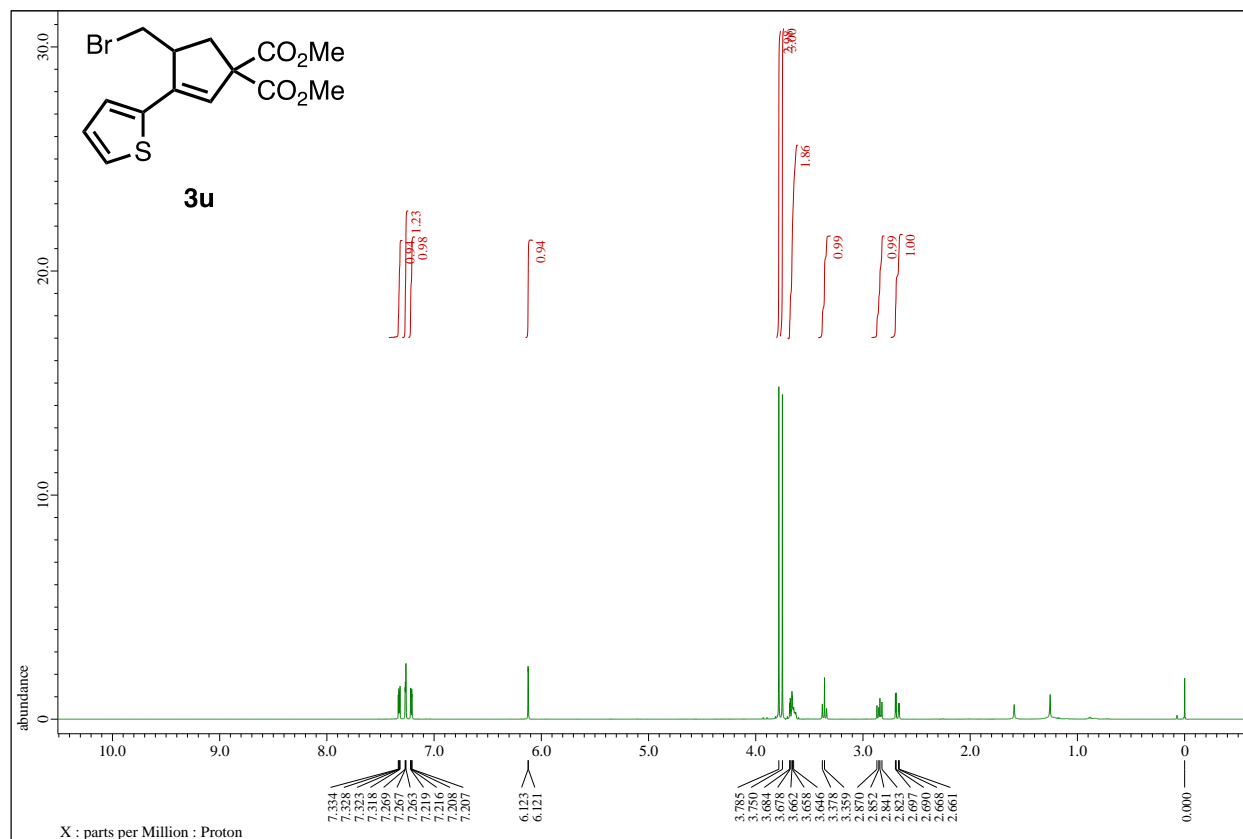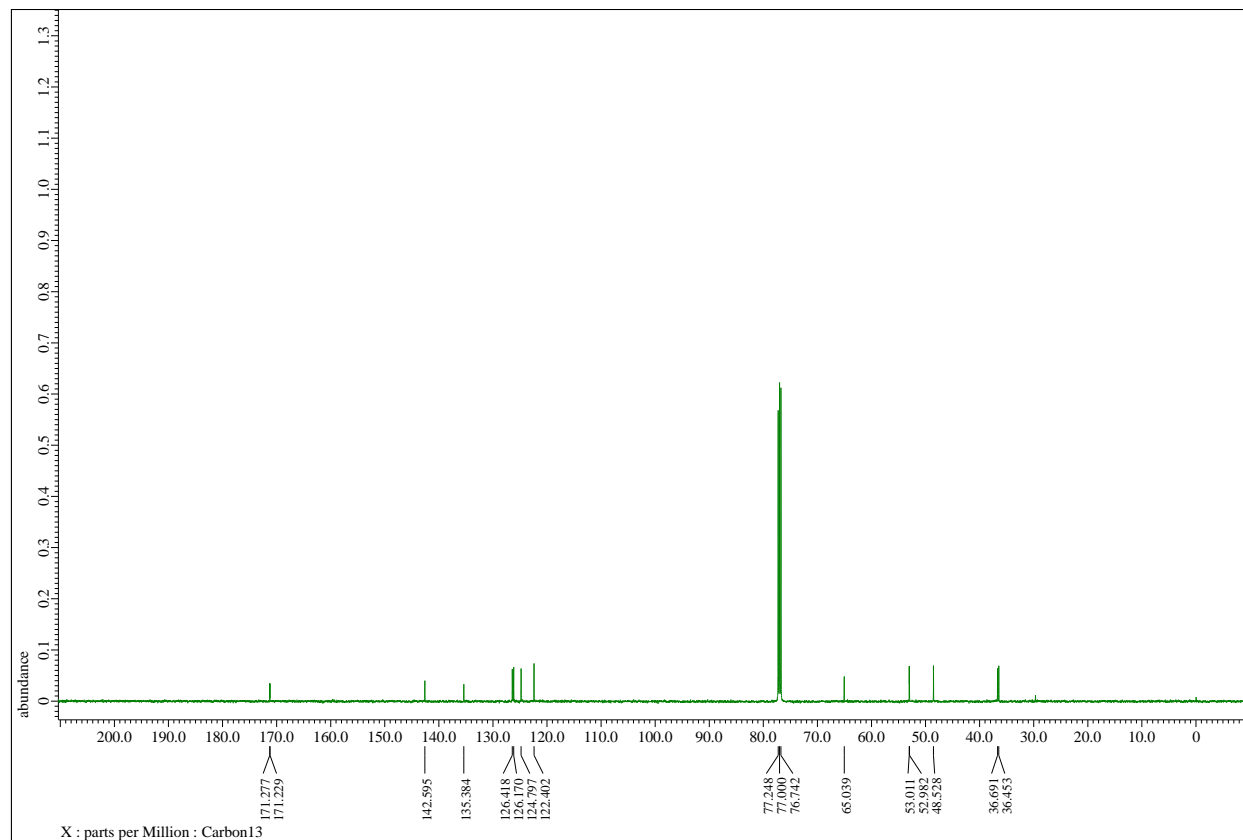

# 9. $^1\text{H}$ NMR, $^{13}\text{C}$ NMR, $^{19}\text{F}$ and DEPT-135 NMR Spectra of 5

## - $^1\text{H}$ and $^{13}\text{C}$ NMR Spectra of 5a

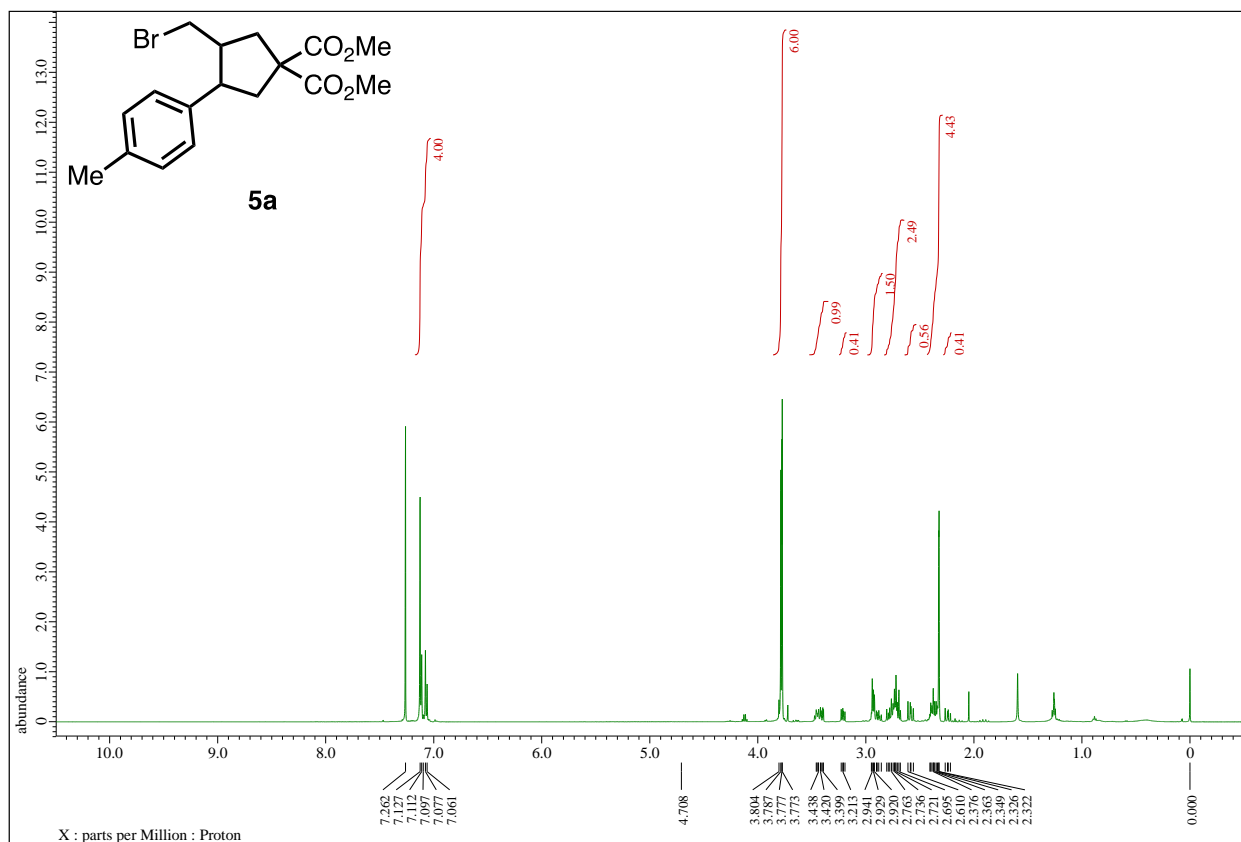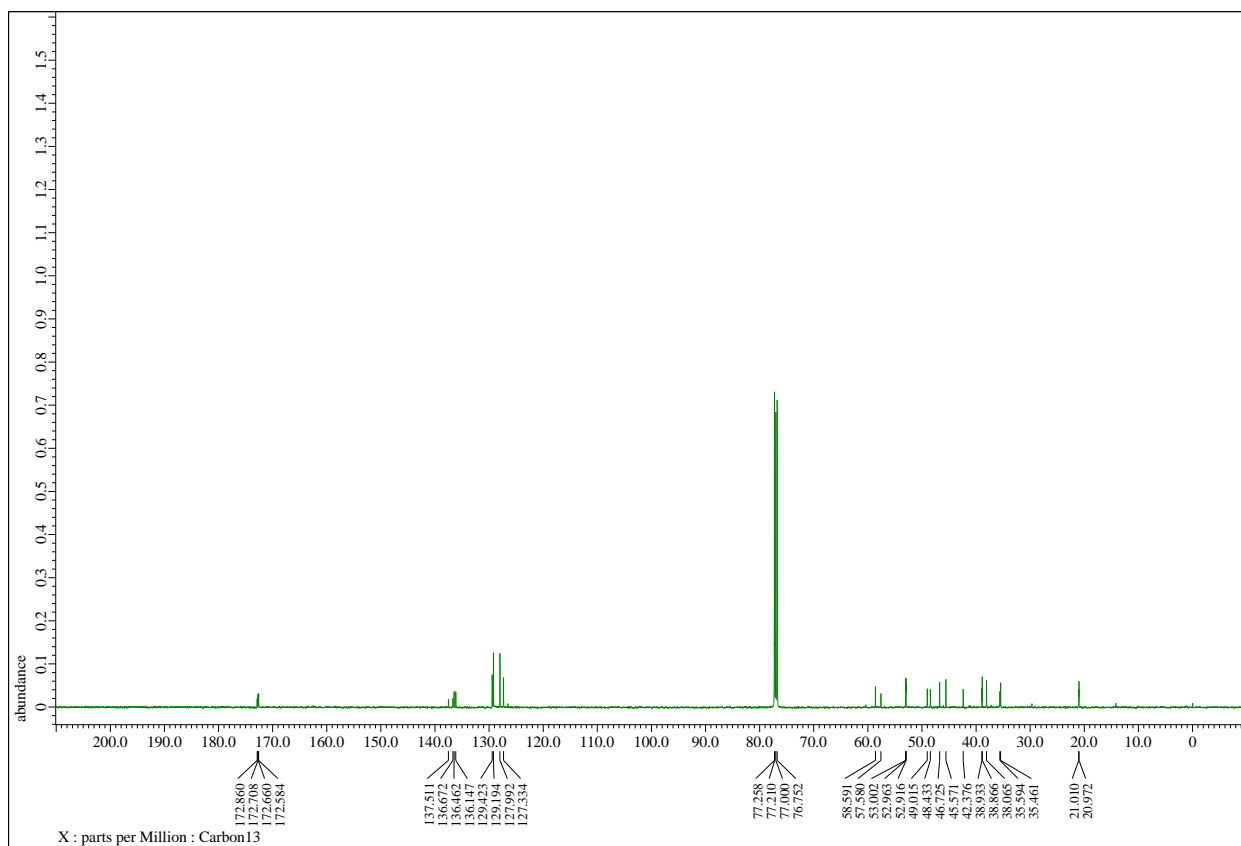

# - $^1\text{H}$ and $^{13}\text{C}$ NMR Spectra of **5b**

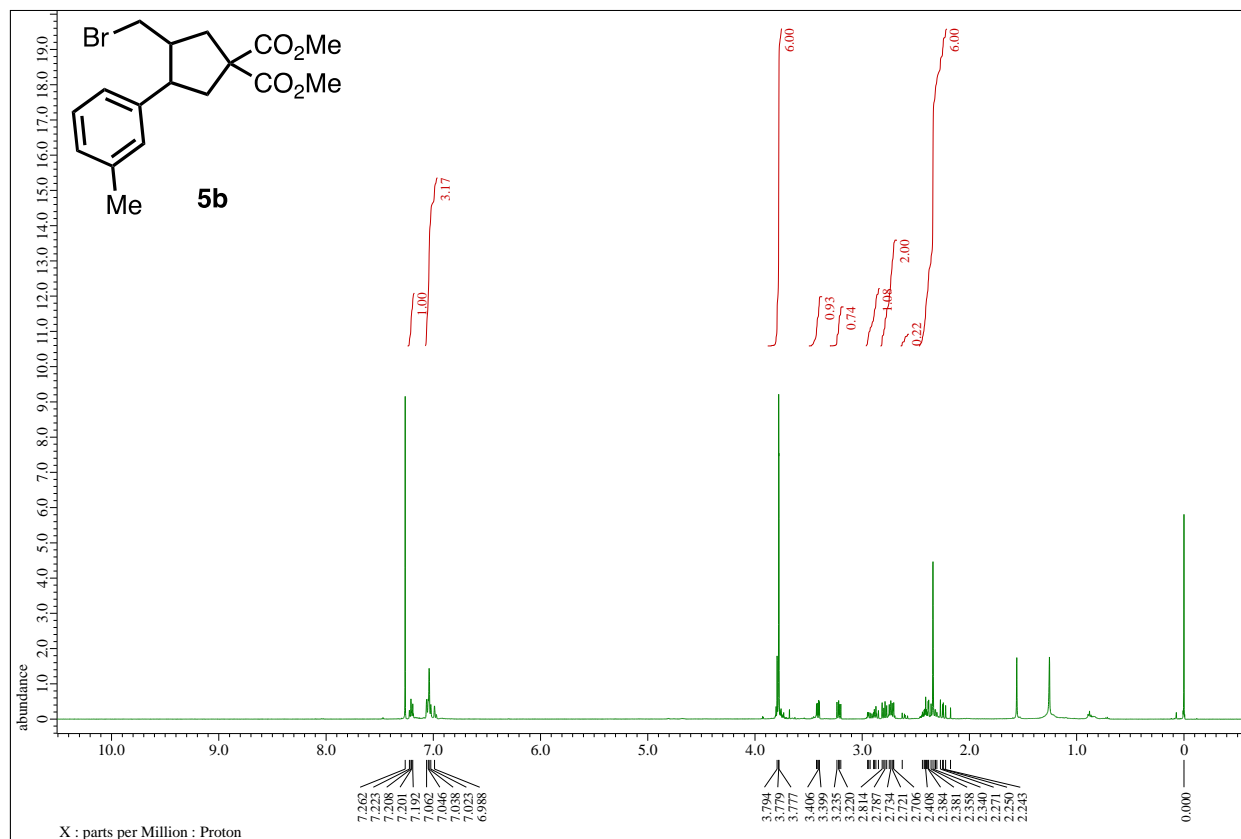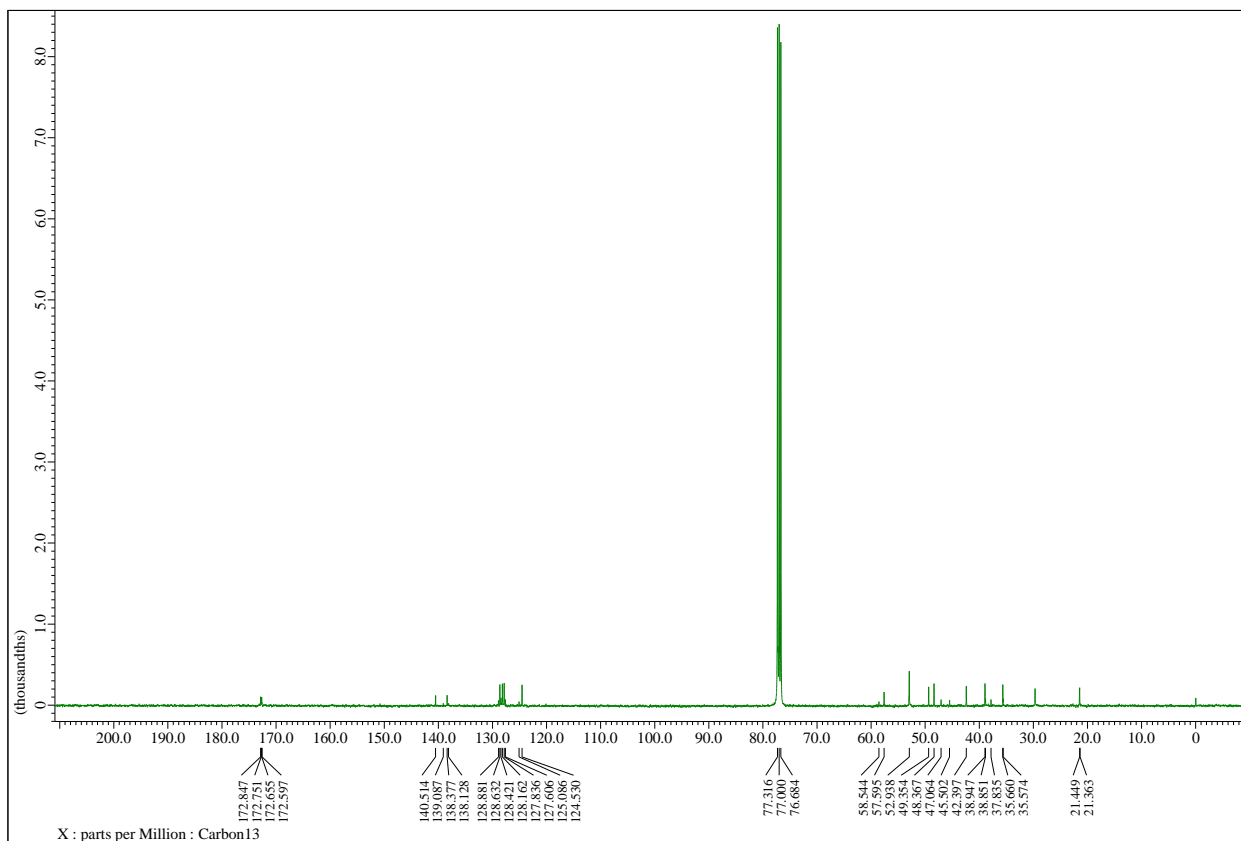

# - $^1\text{H}$ and $^{13}\text{C}$ NMR Spectra of **5c**

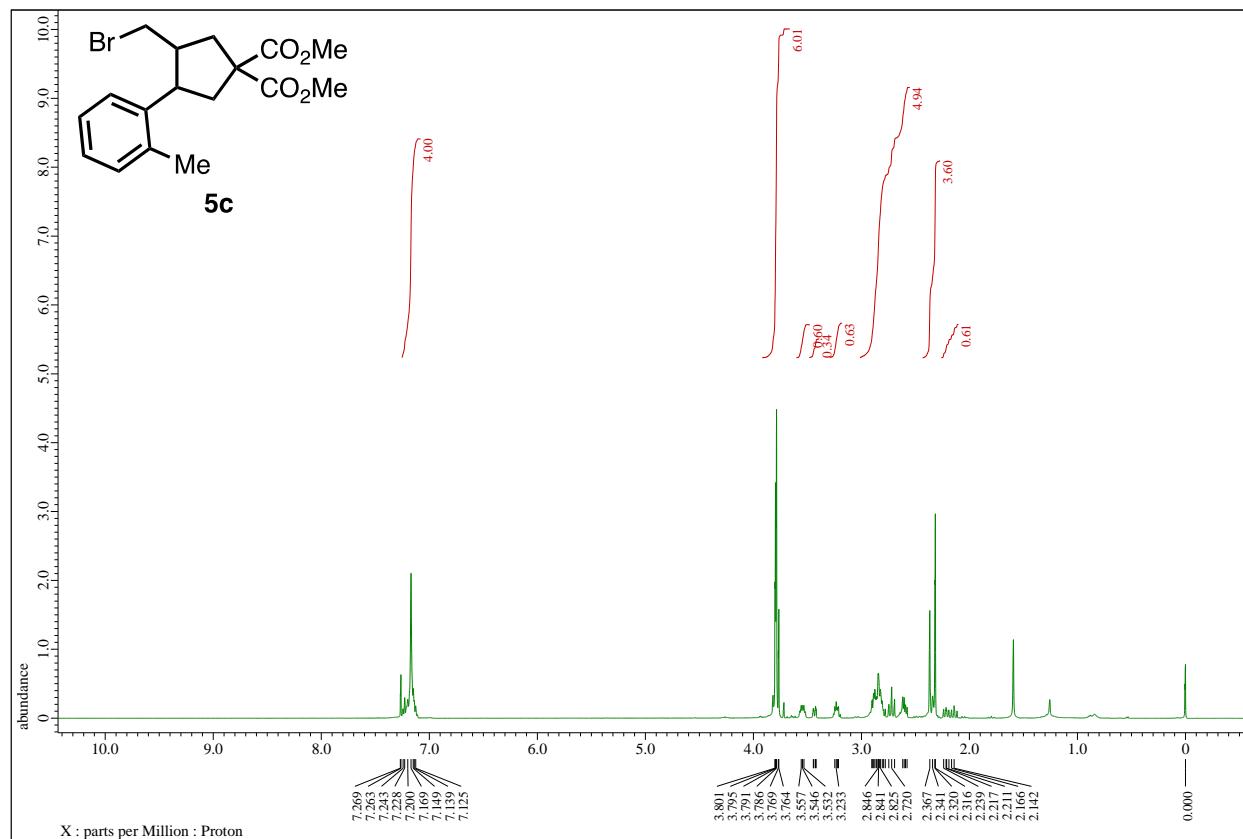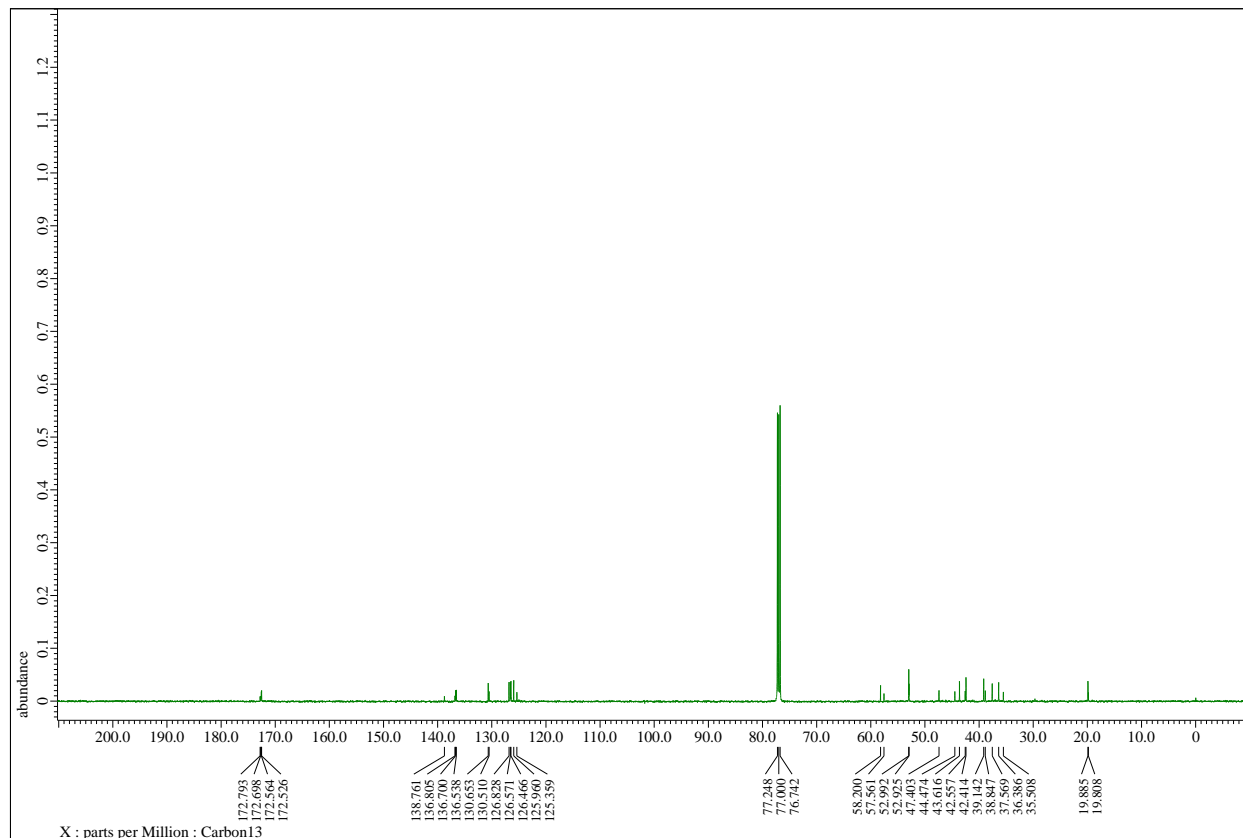

# - $^1\text{H}$ and $^{13}\text{C}$ NMR Spectra of **5d**

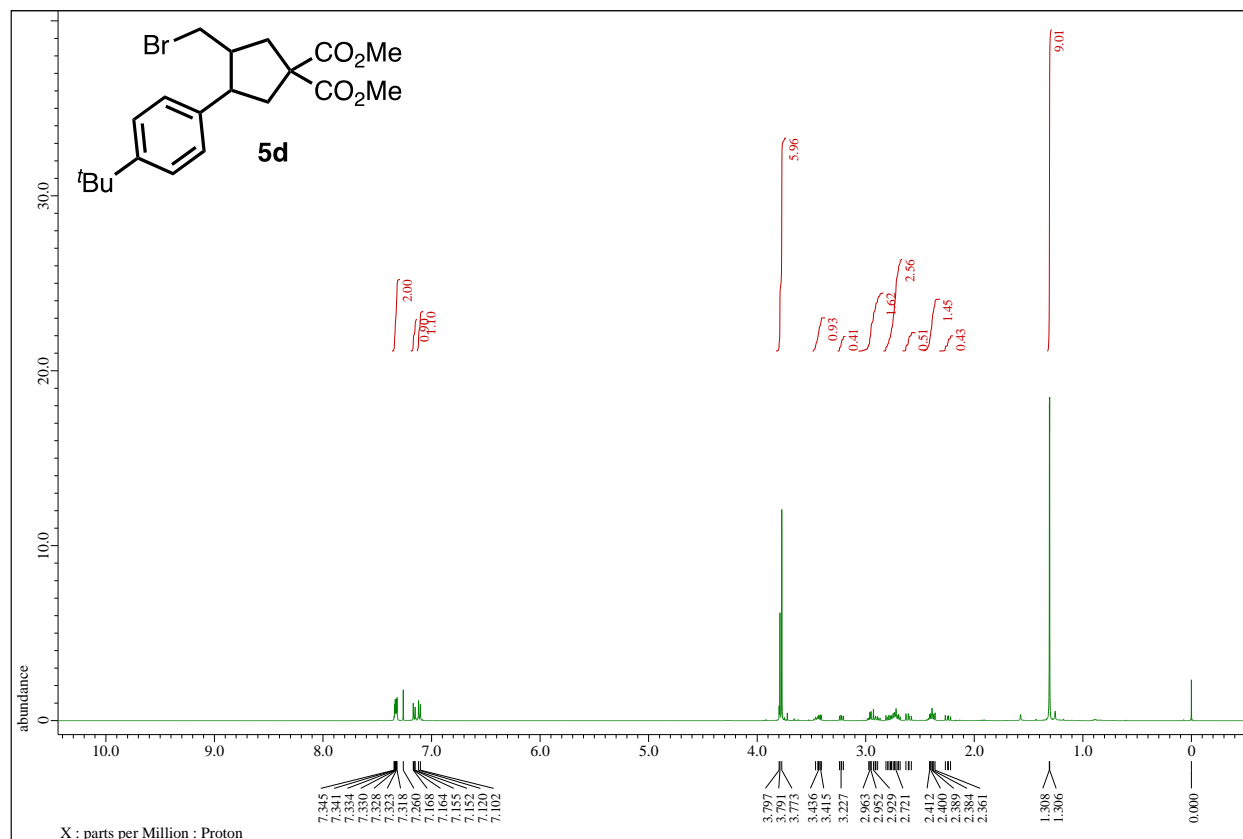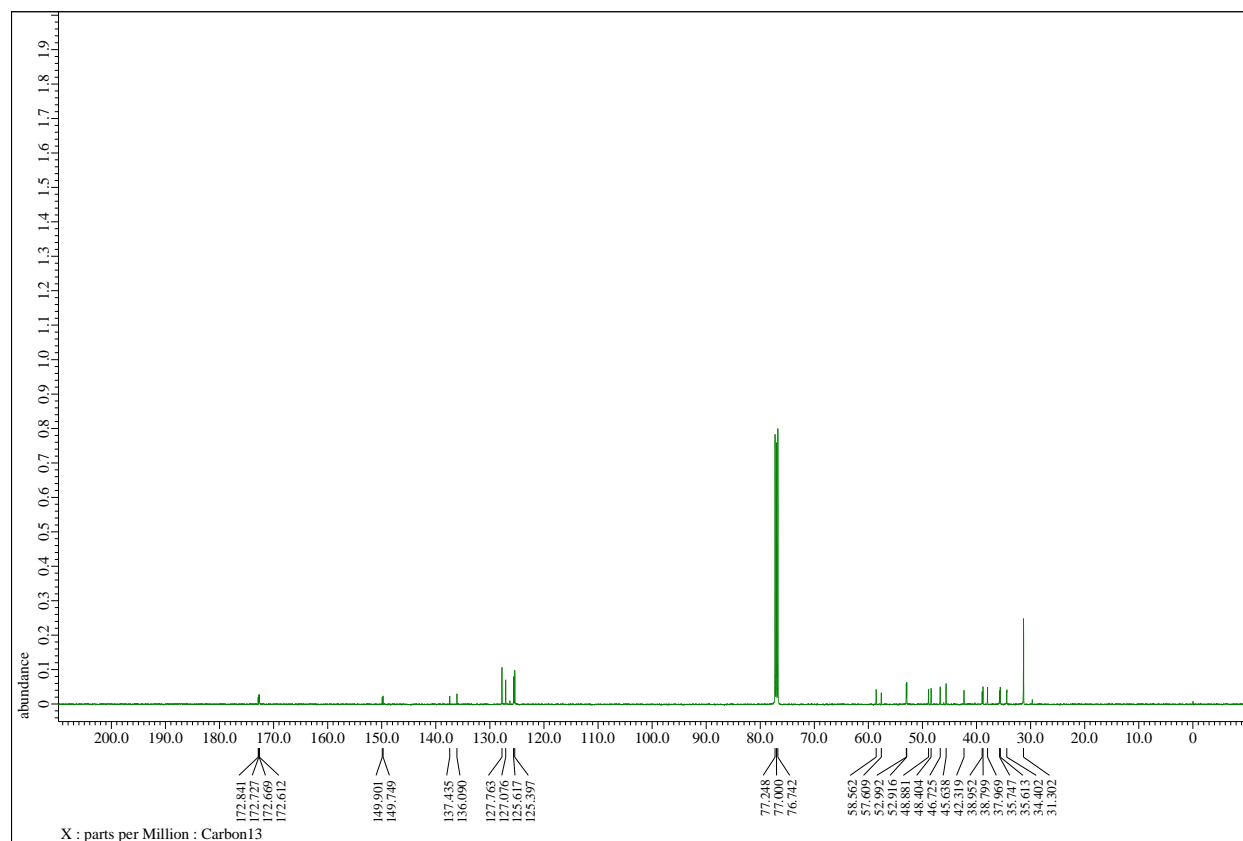



### - $^1\text{H}$ and $^{13}\text{C}$ NMR Spectra of 5e

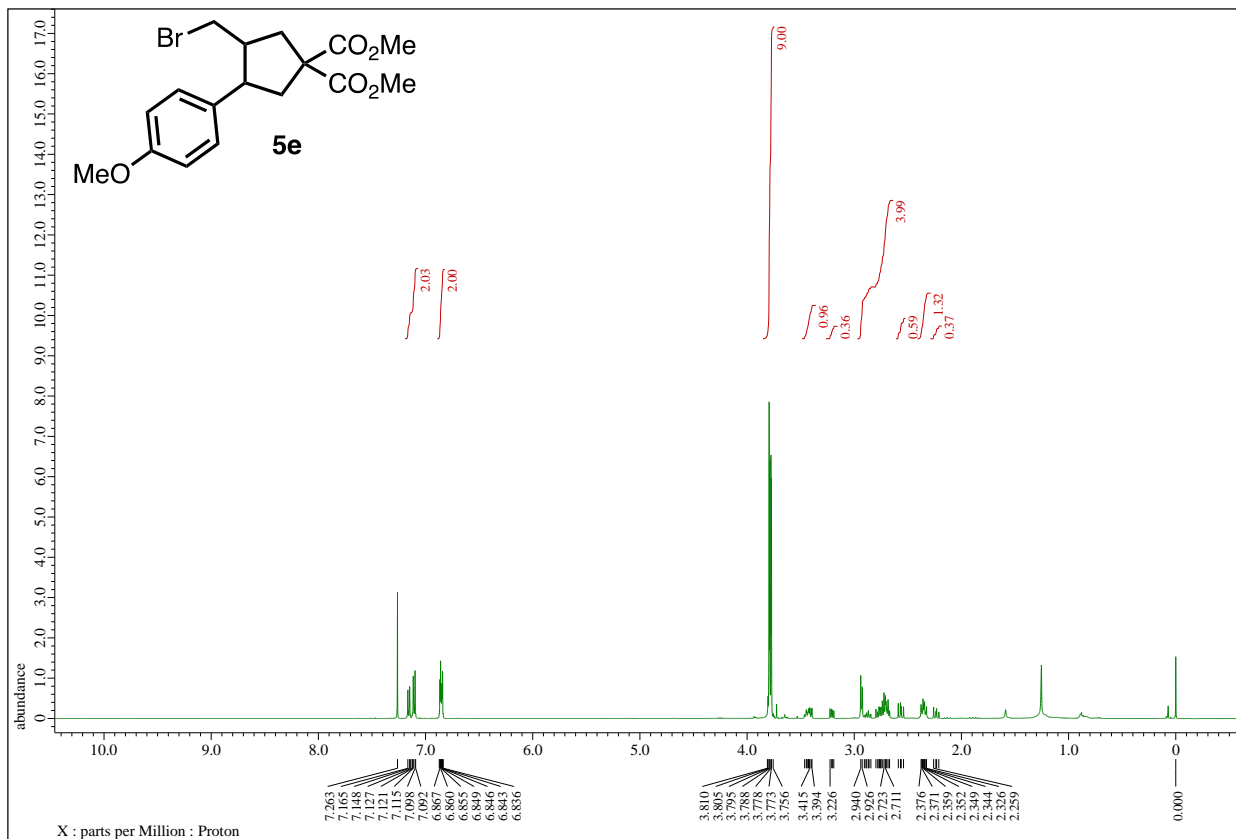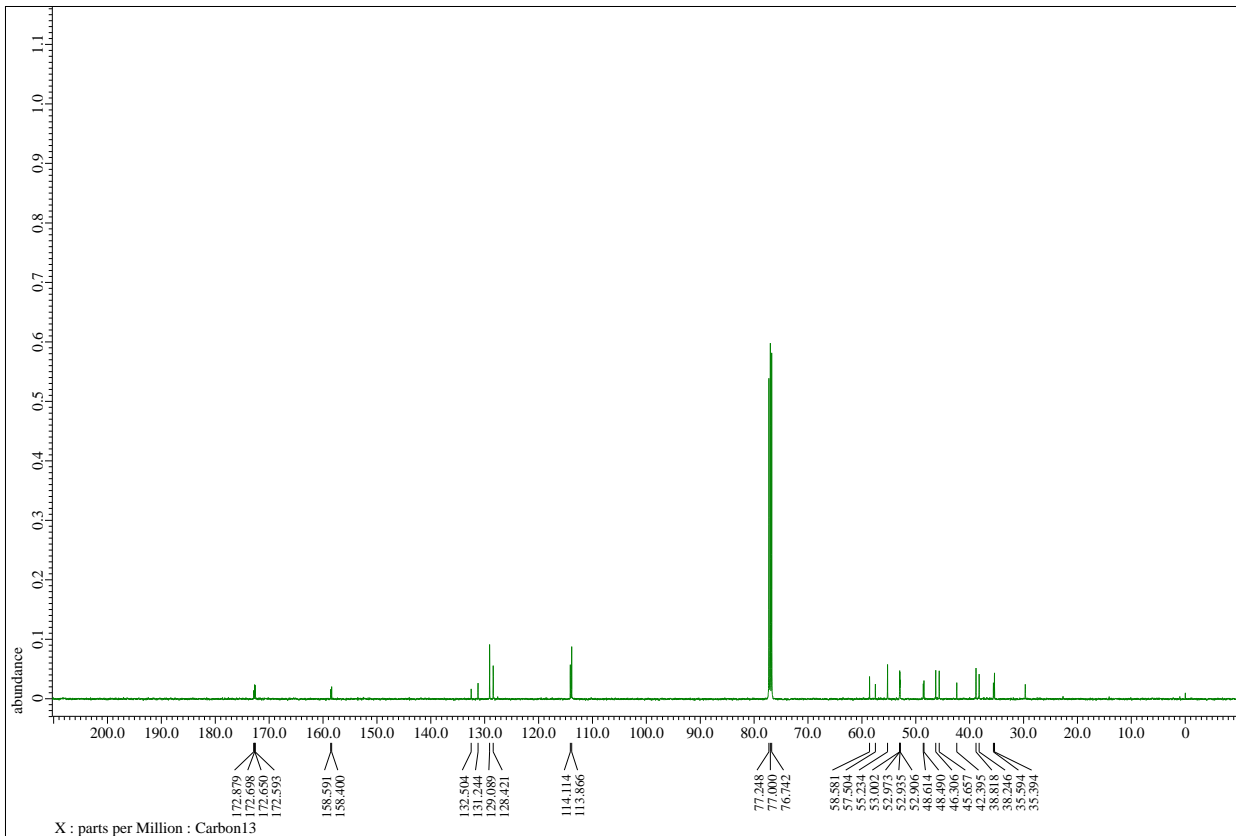

-  $^1\text{H}$ ,  $^{13}\text{C}$  and  $^{19}\text{F}$  NMR Spectra of **5f**

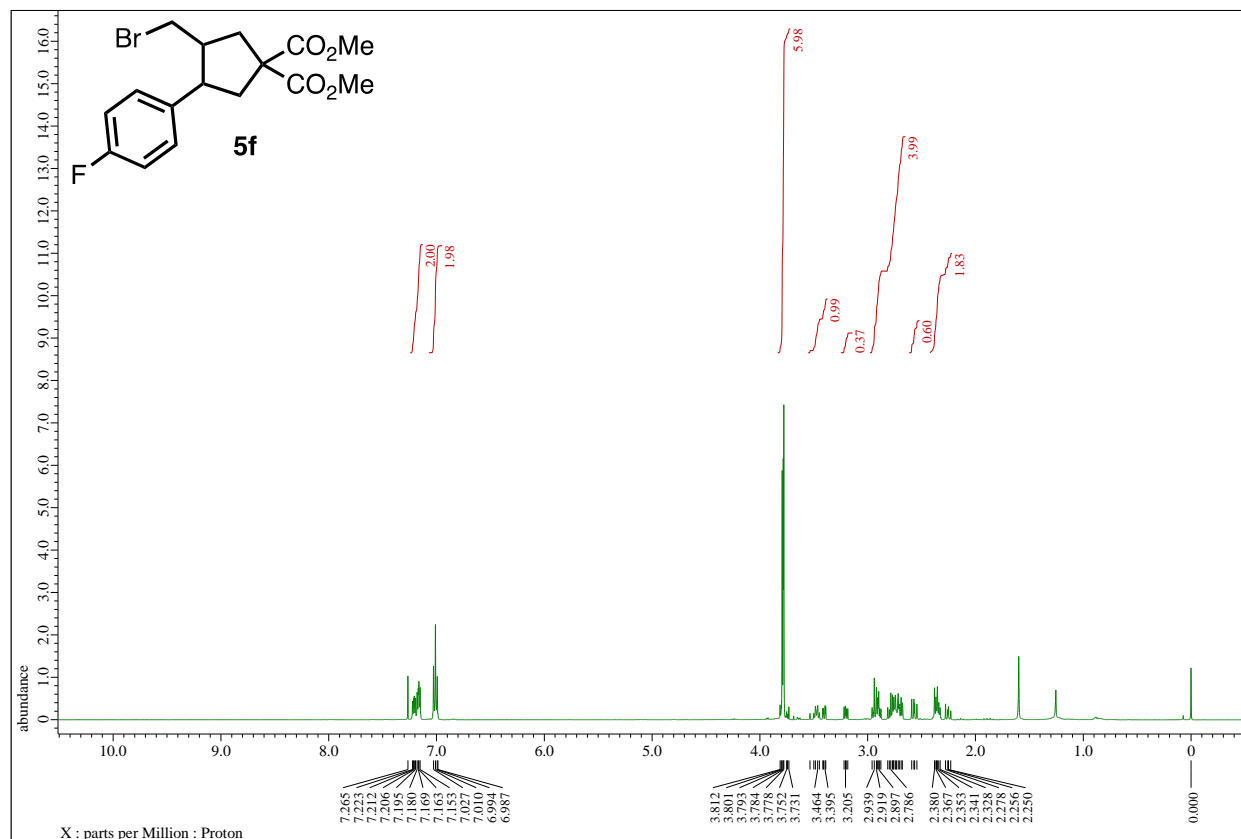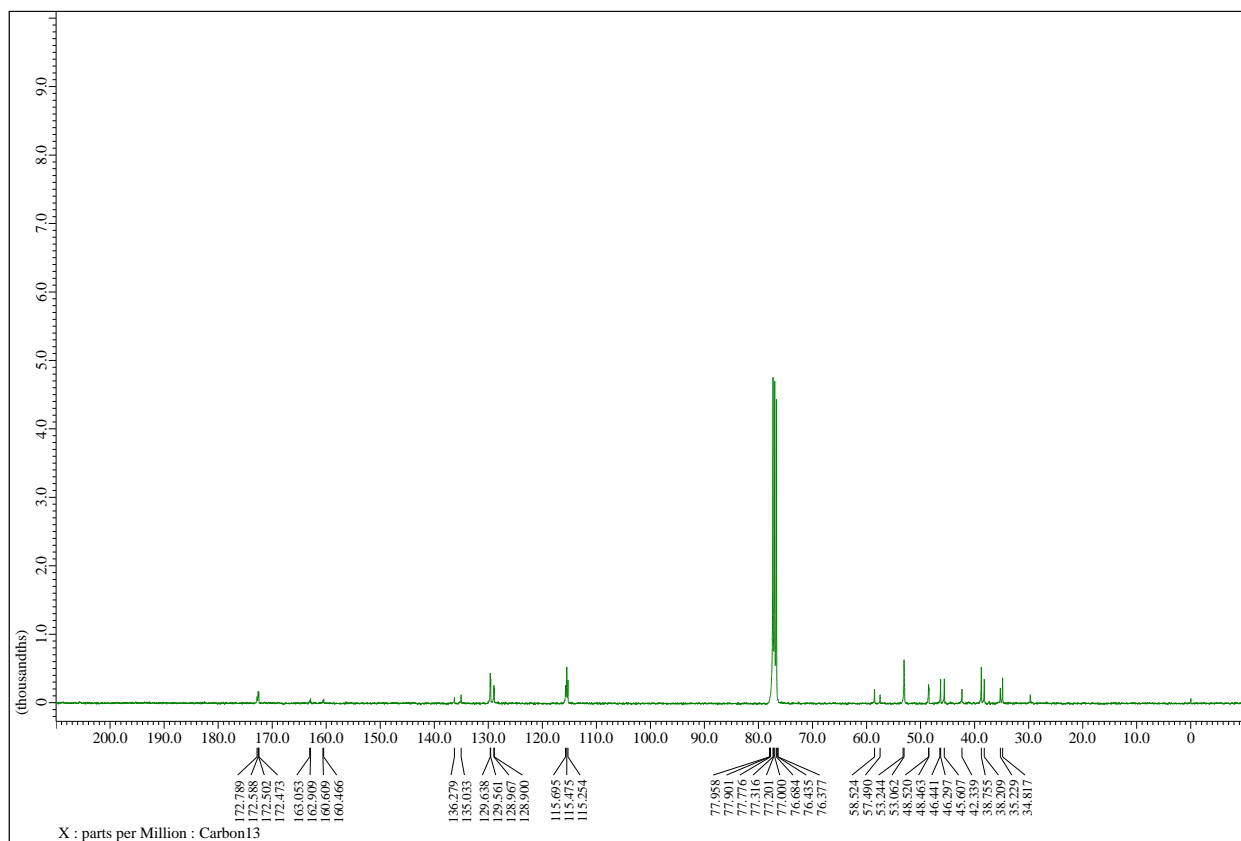

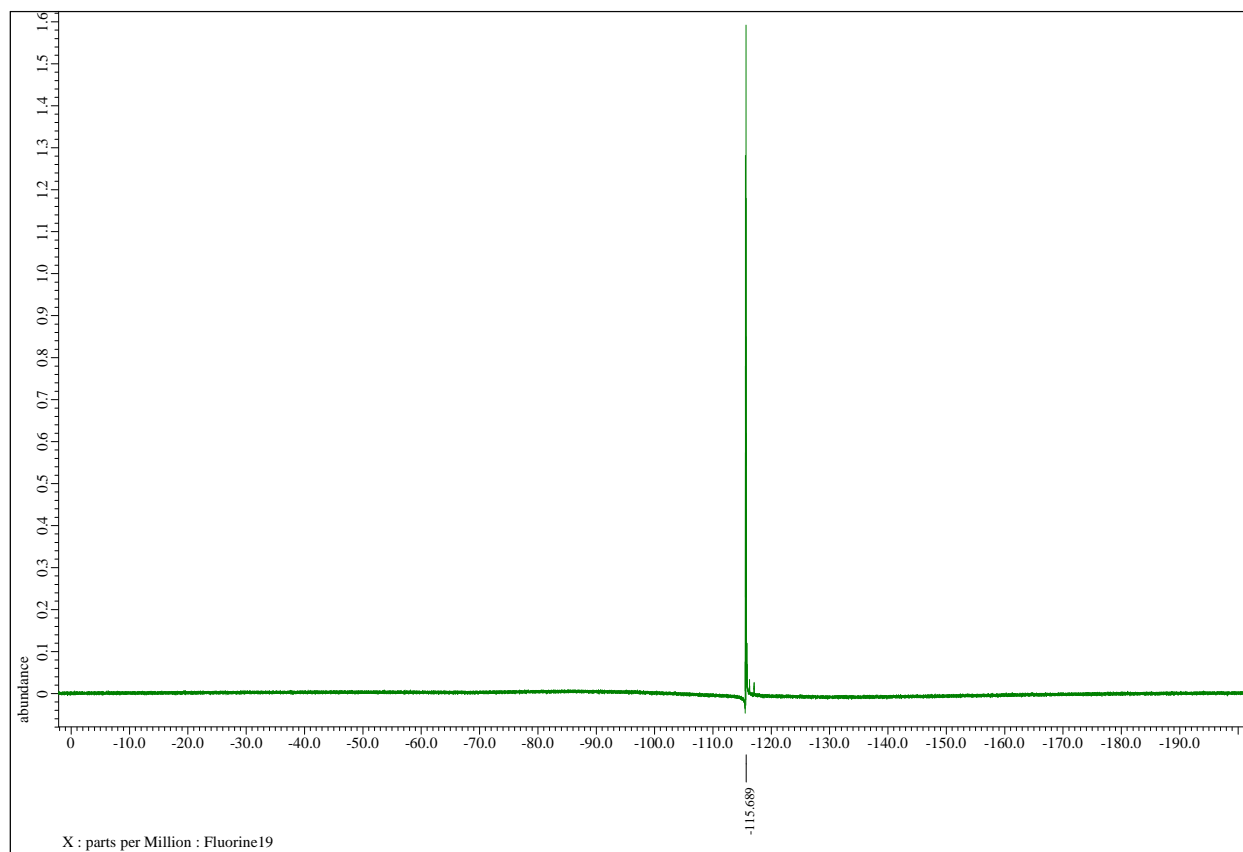

# - $^1\text{H}$ and $^{13}\text{C}$ NMR Spectra of 5g

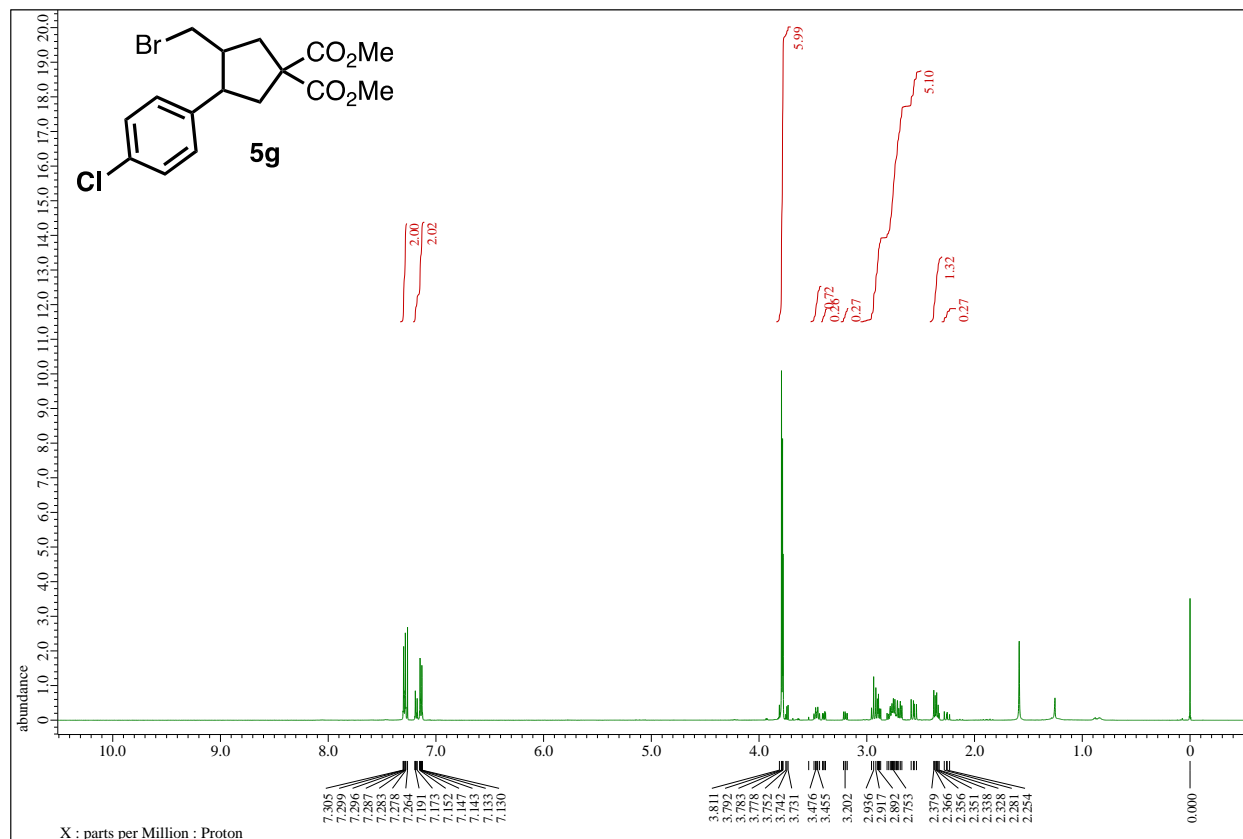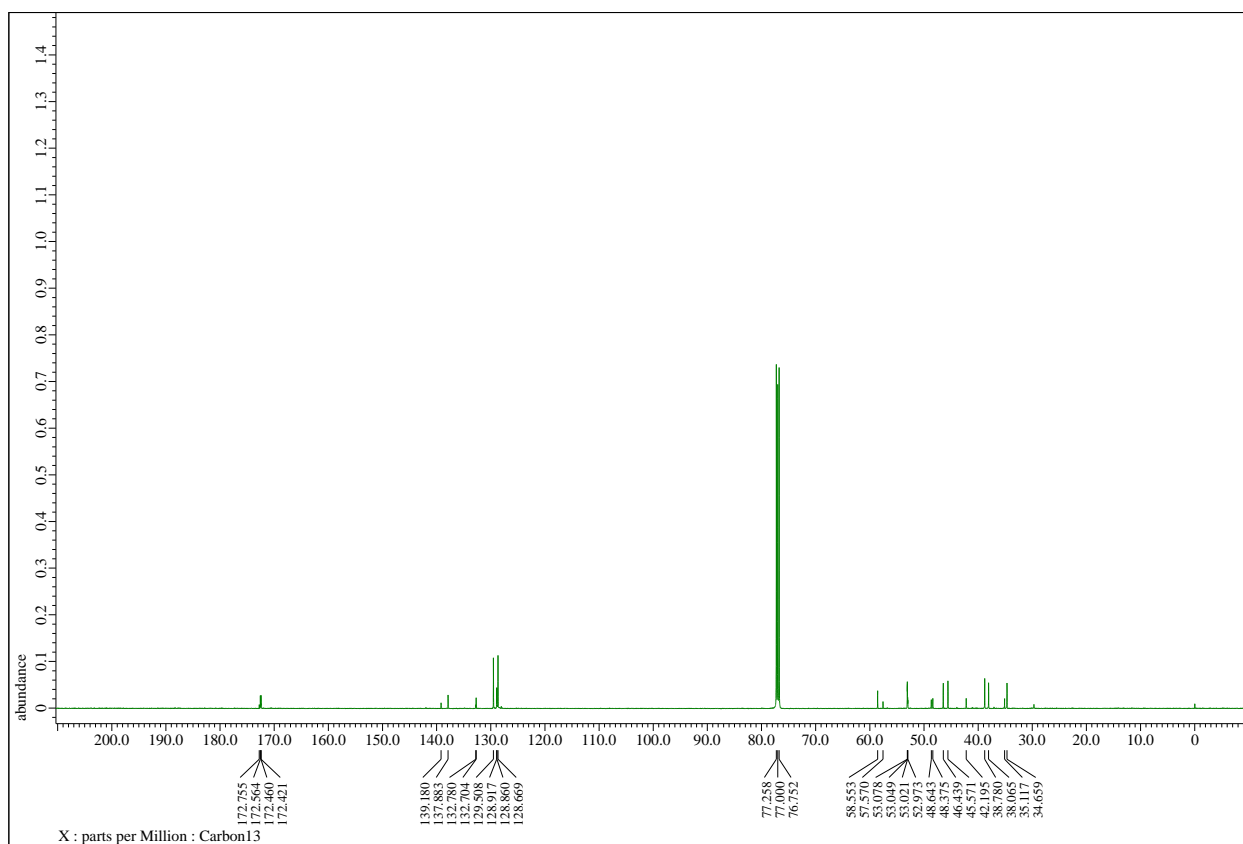

# - $^1\text{H}$ and $^{13}\text{C}$ NMR Spectra of 5h

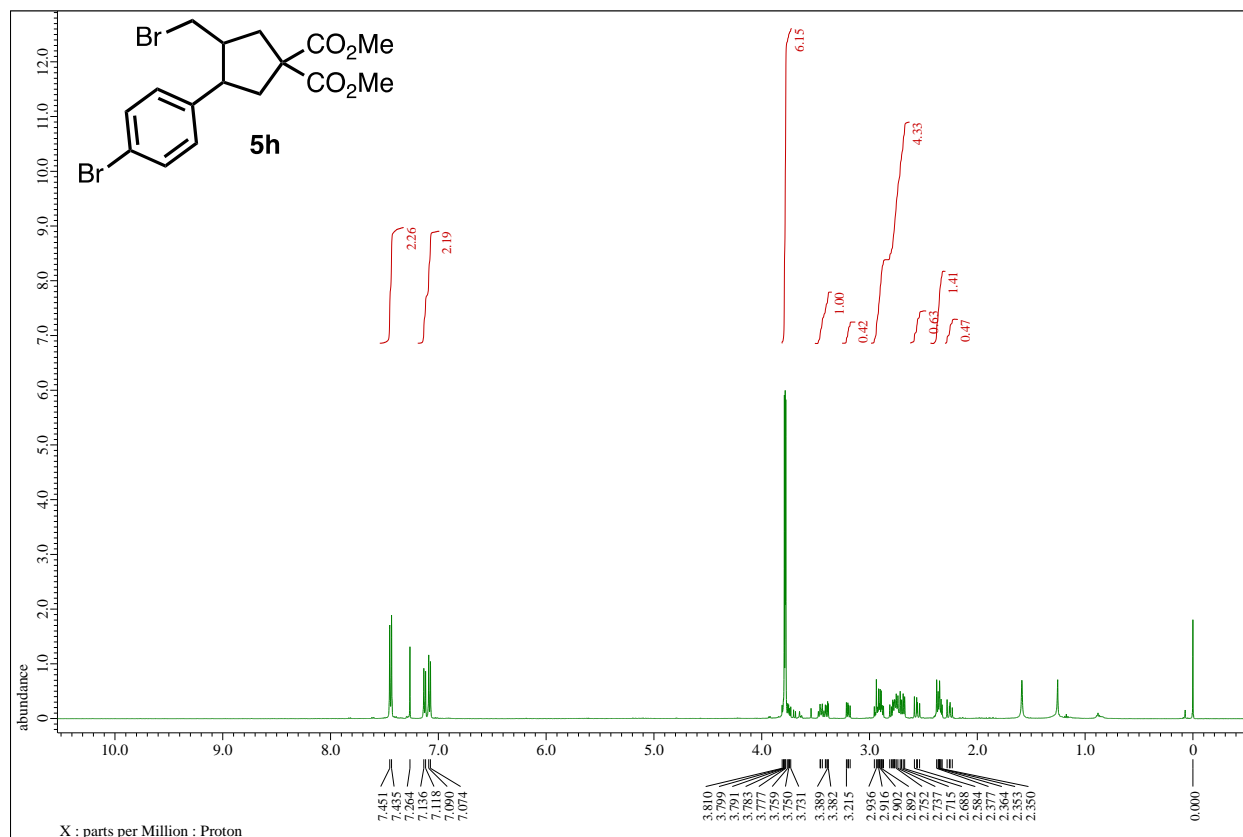

### - $^1\text{H}$ and $^{13}\text{C}$ NMR Spectra of 5i

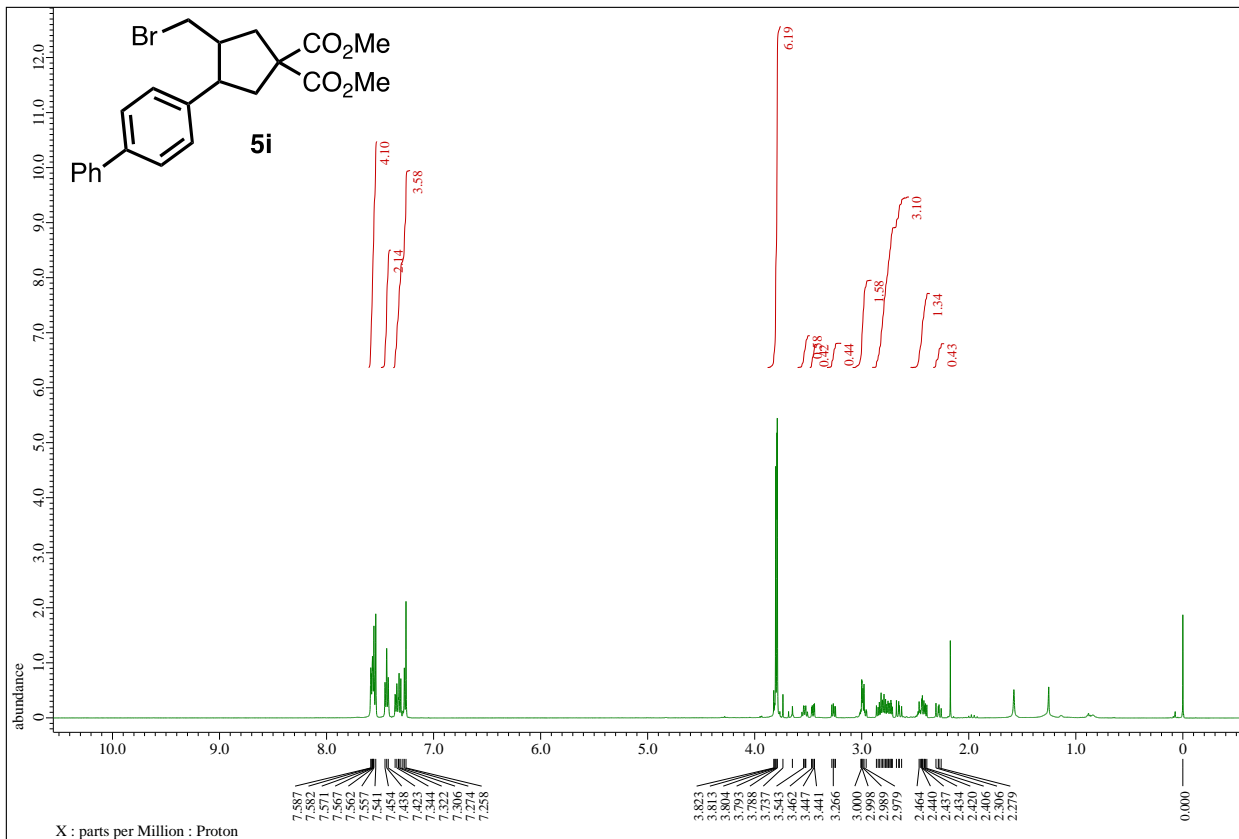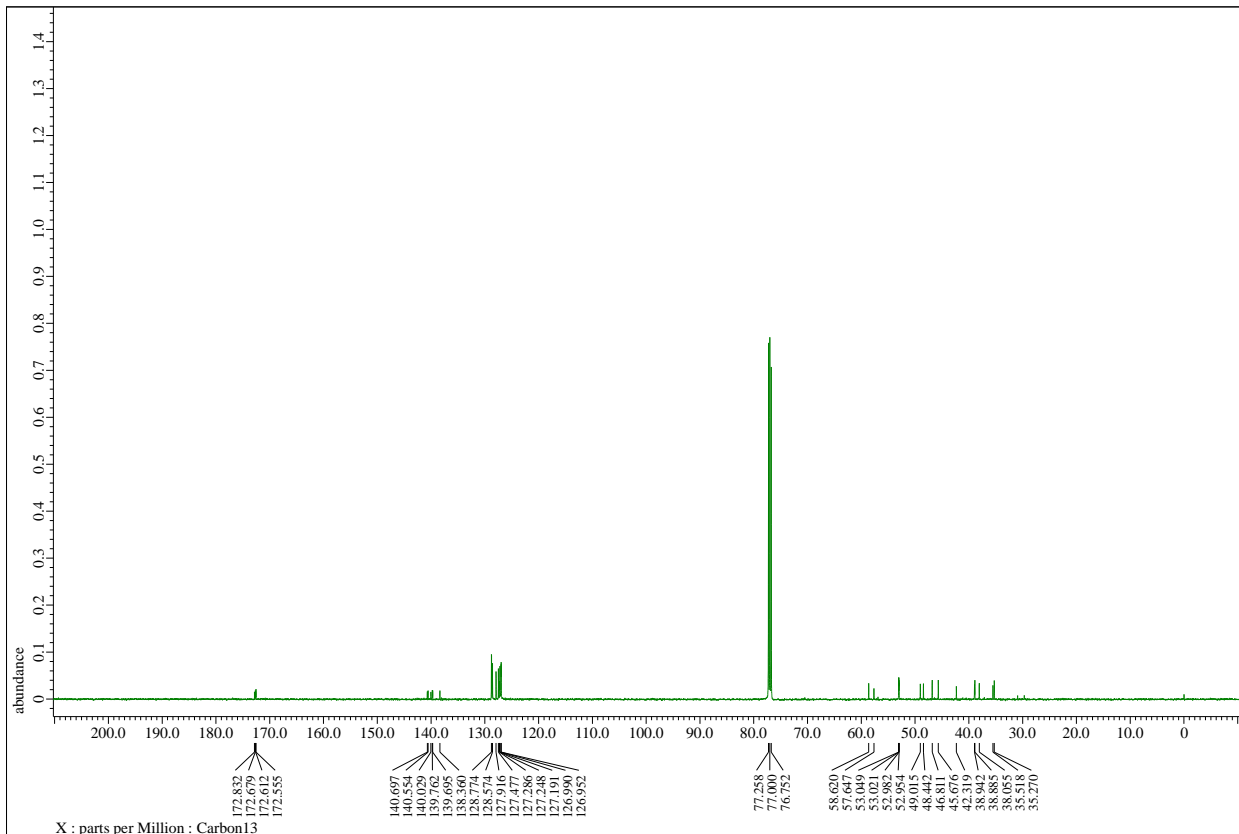

# - $^1\text{H}$ and $^{13}\text{C}$ NMR Spectra of **5j**

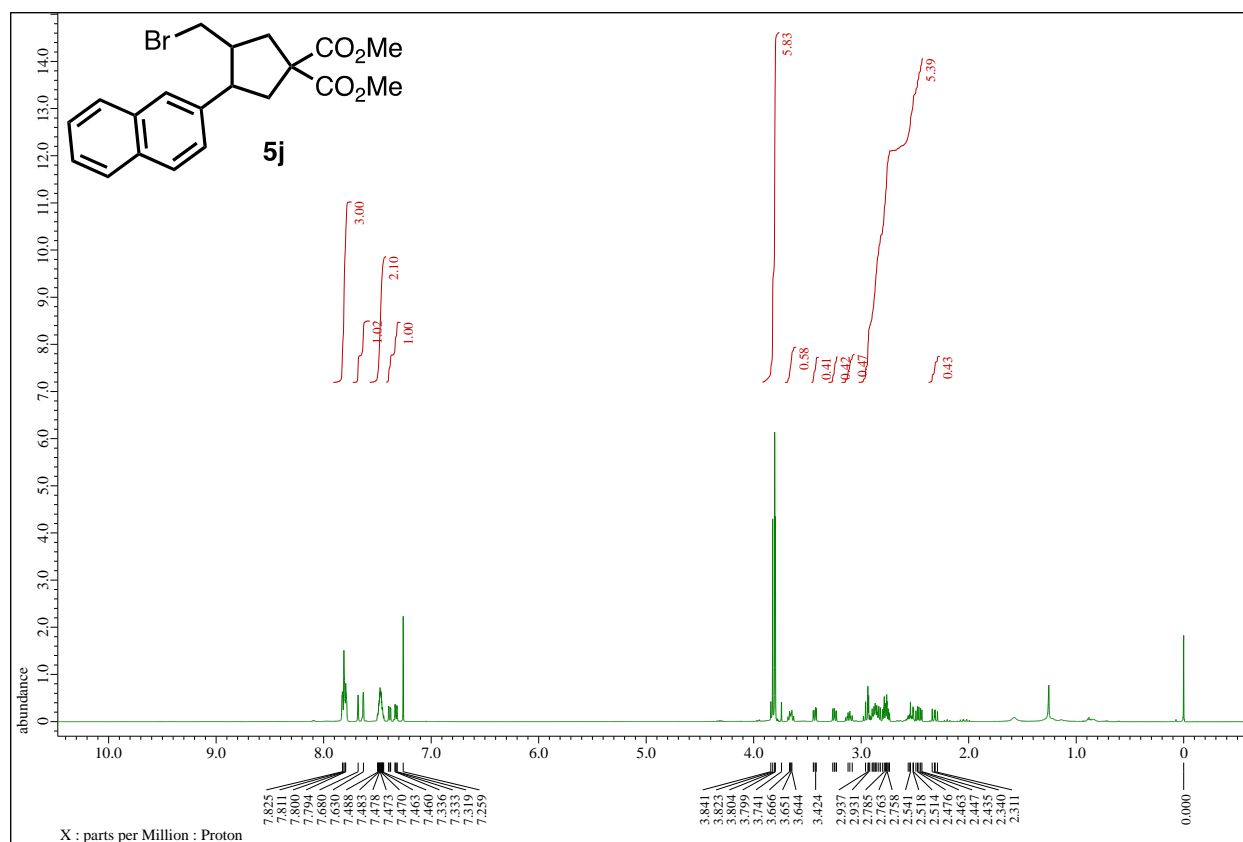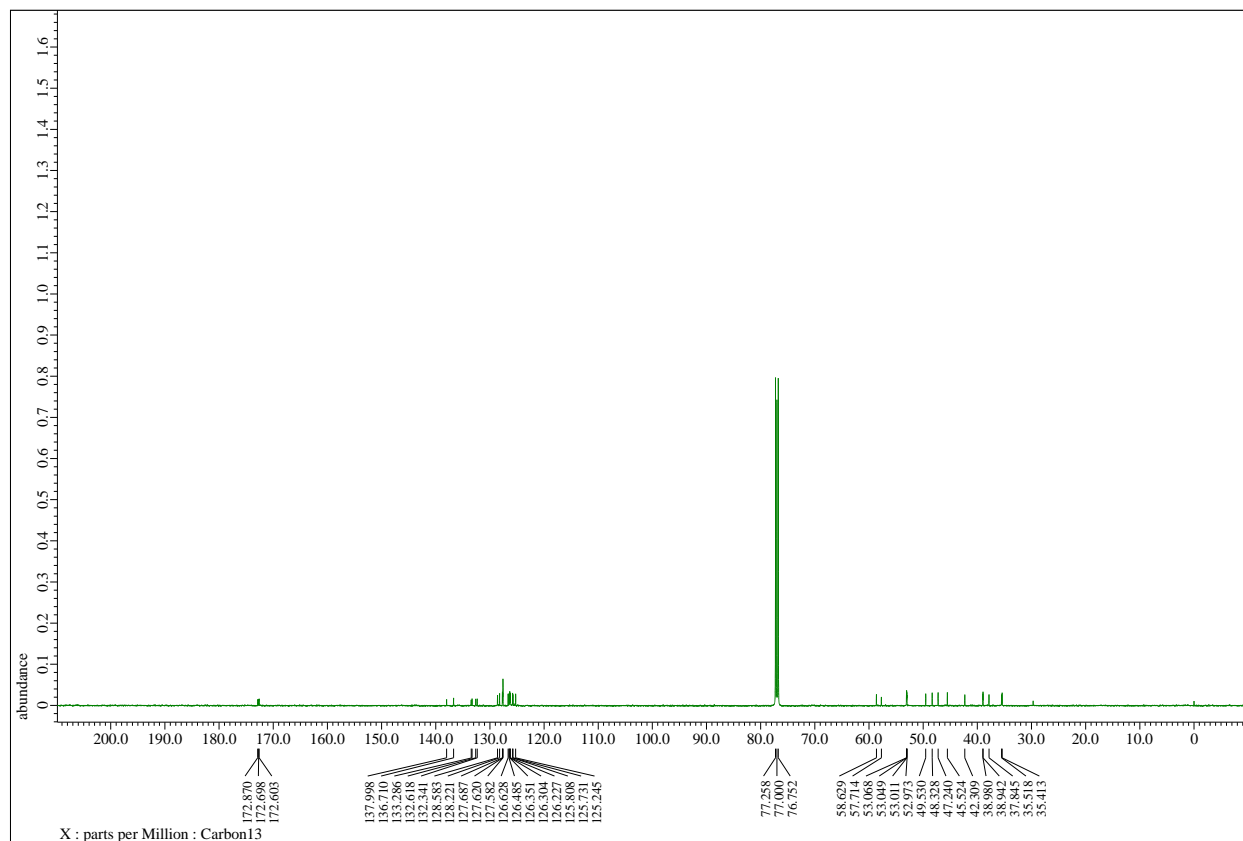

# - $^1\text{H}$ and $^{13}\text{C}$ NMR Spectra of 5k

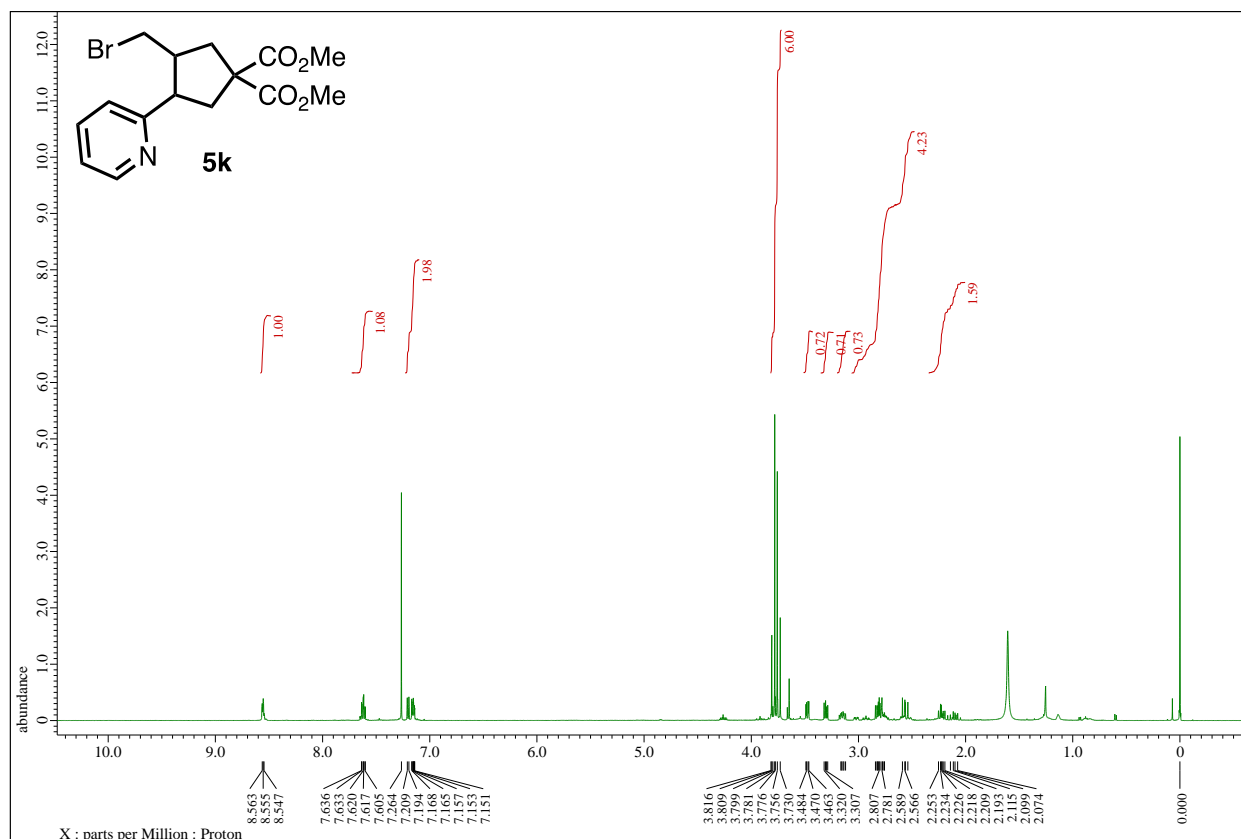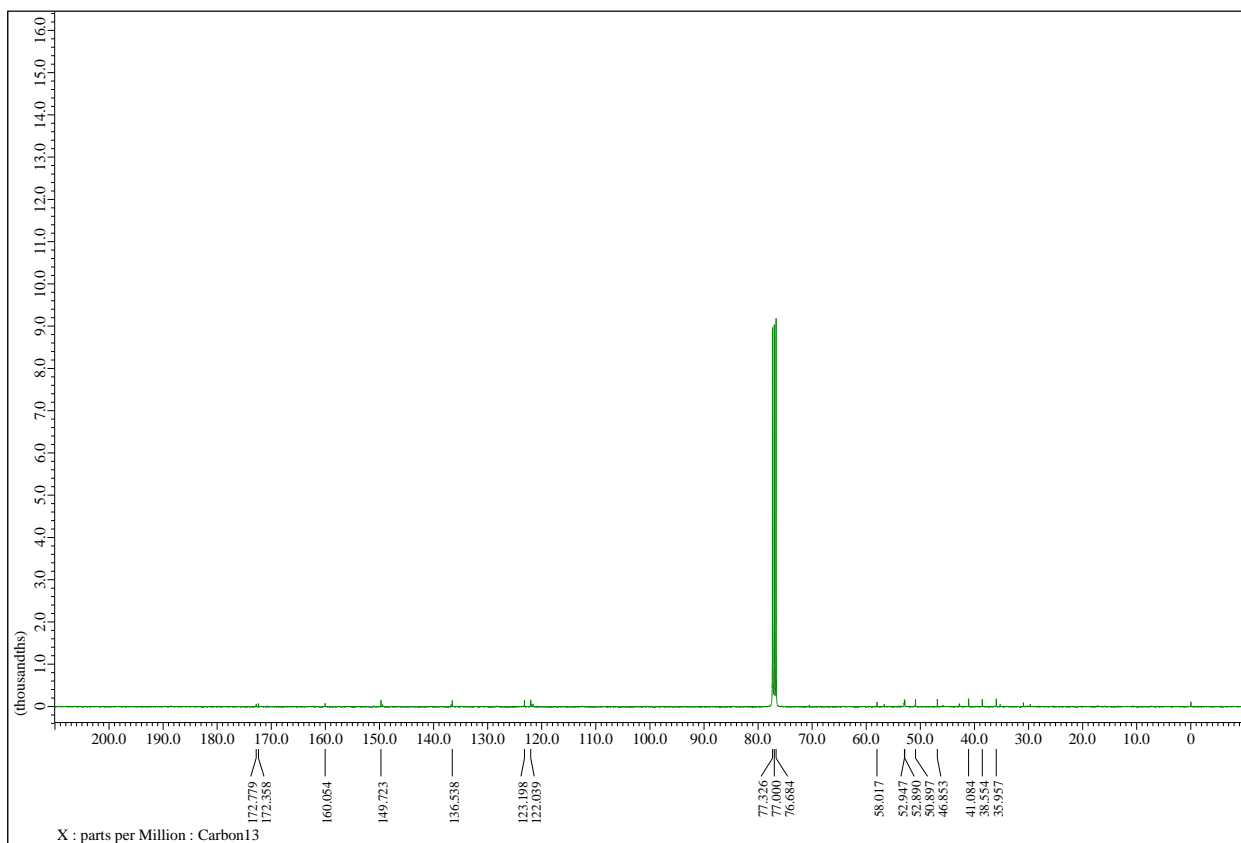



-  $^1\text{H}$ ,  $^{13}\text{C}$  and DEPT-135 NMR Spectra of 5l

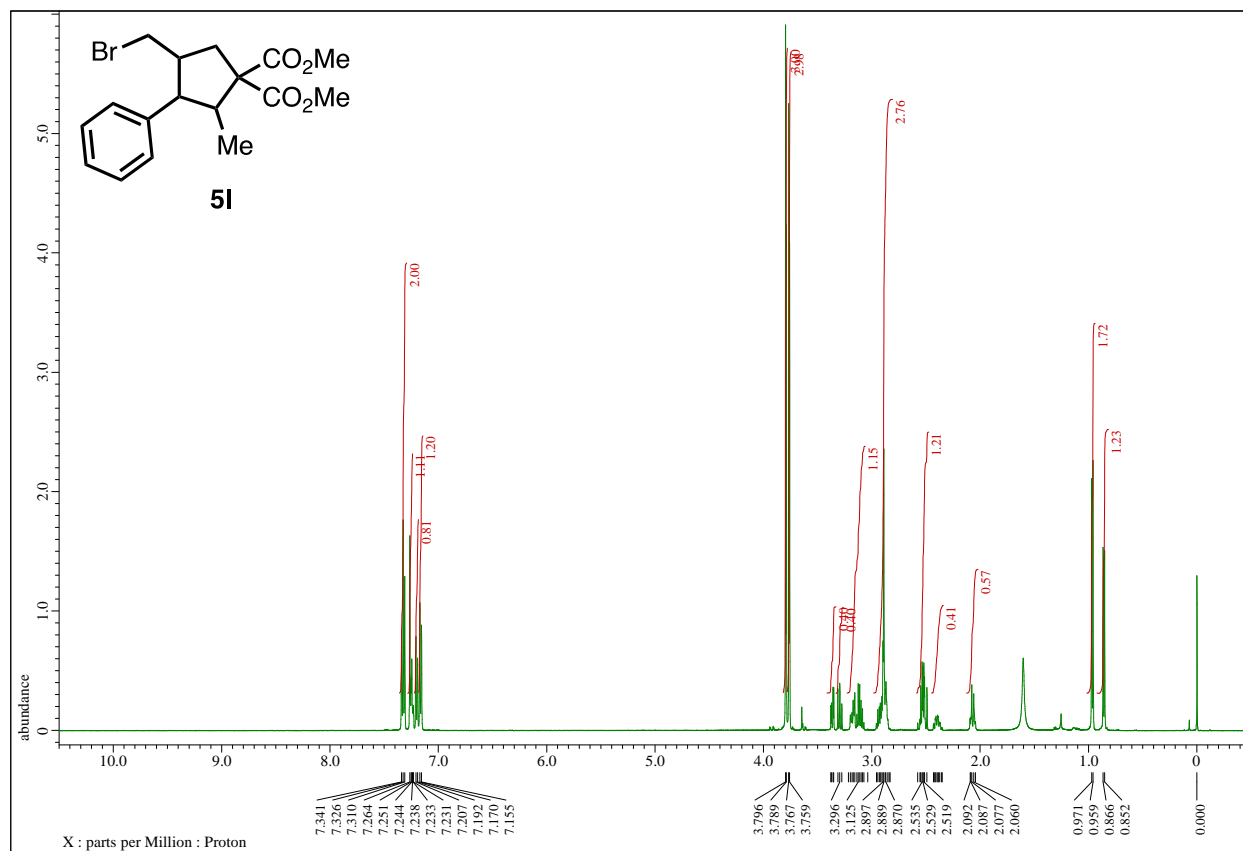

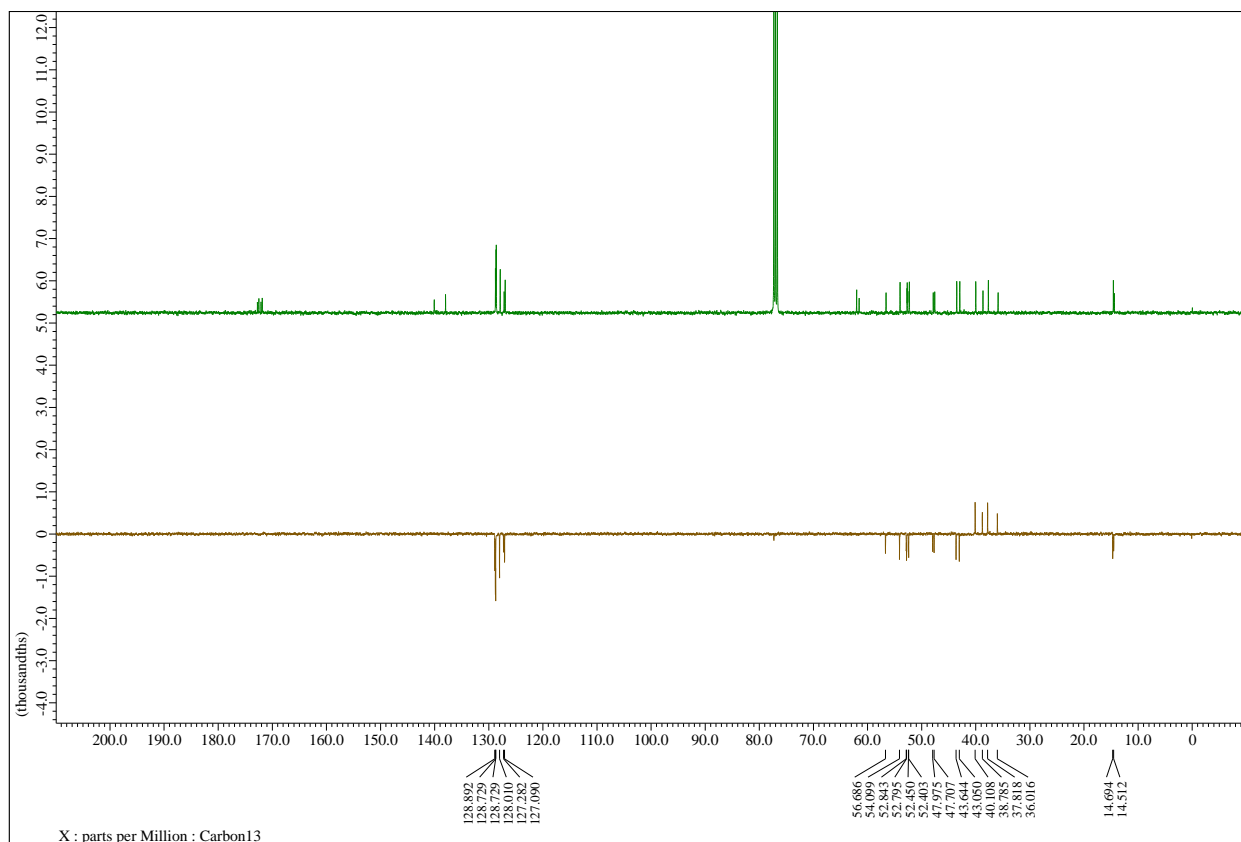

# 10. <sup>1</sup>H NMR, <sup>13</sup>C NMR, <sup>19</sup>F and DEPT-135 NMR Spectra of 6

## - <sup>1</sup>H and <sup>13</sup>C NMR Spectra of 6b

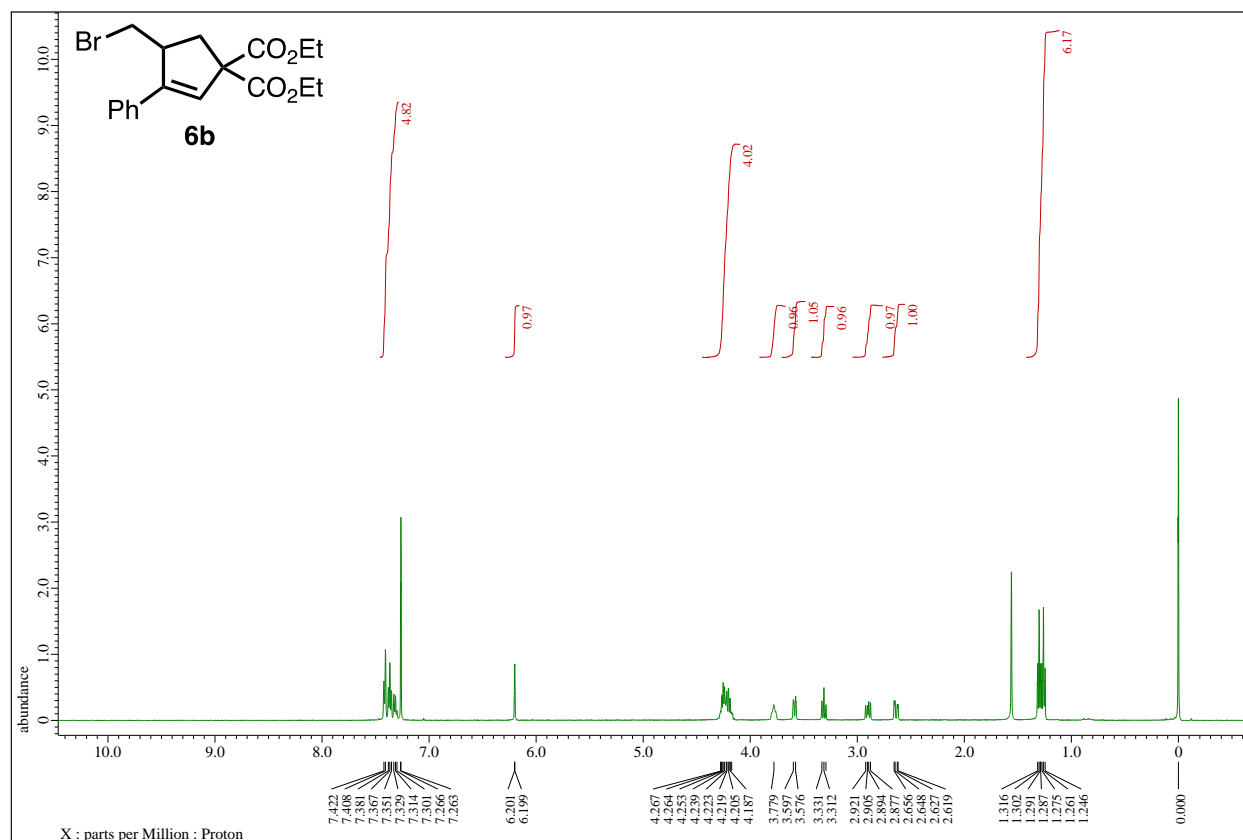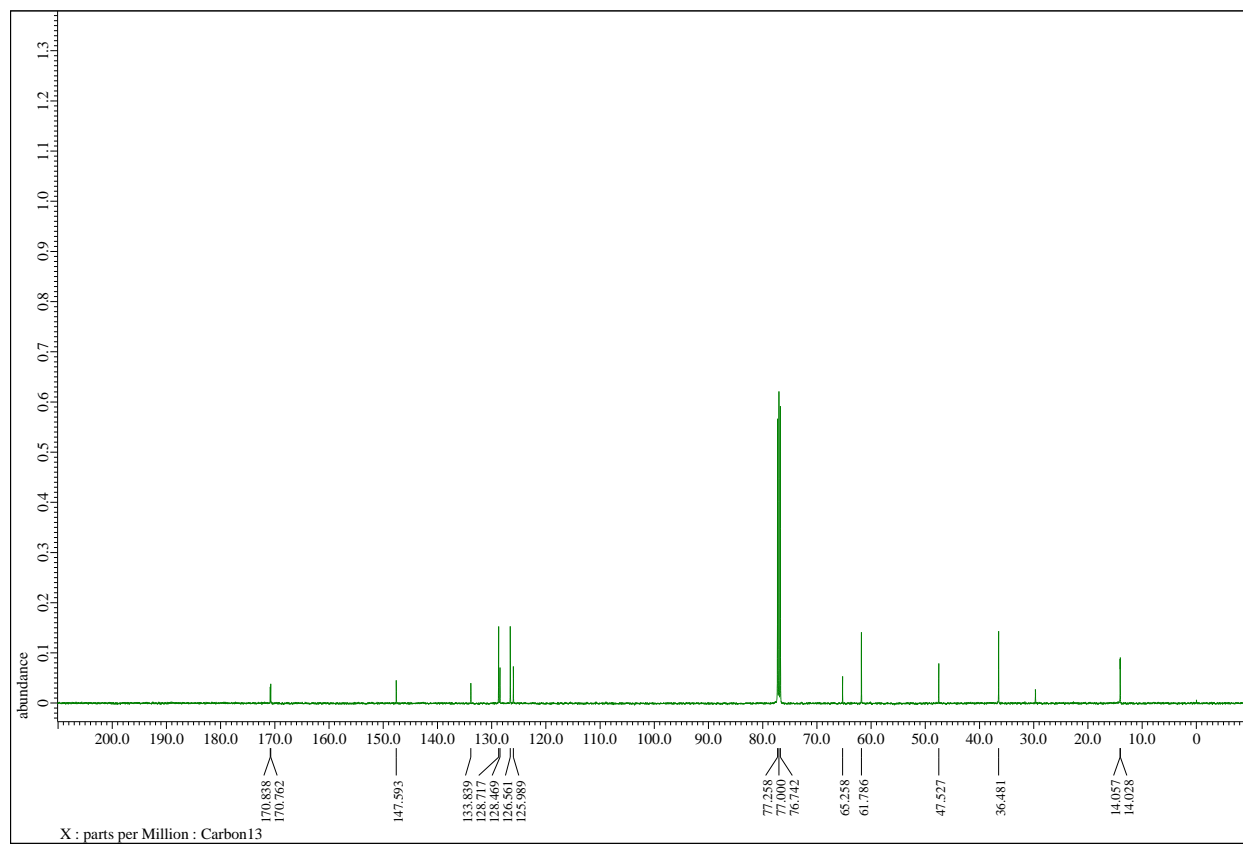

# - $^1\text{H}$ , $^{13}\text{C}$ and DEPT-135 NMR Spectra of **6c**

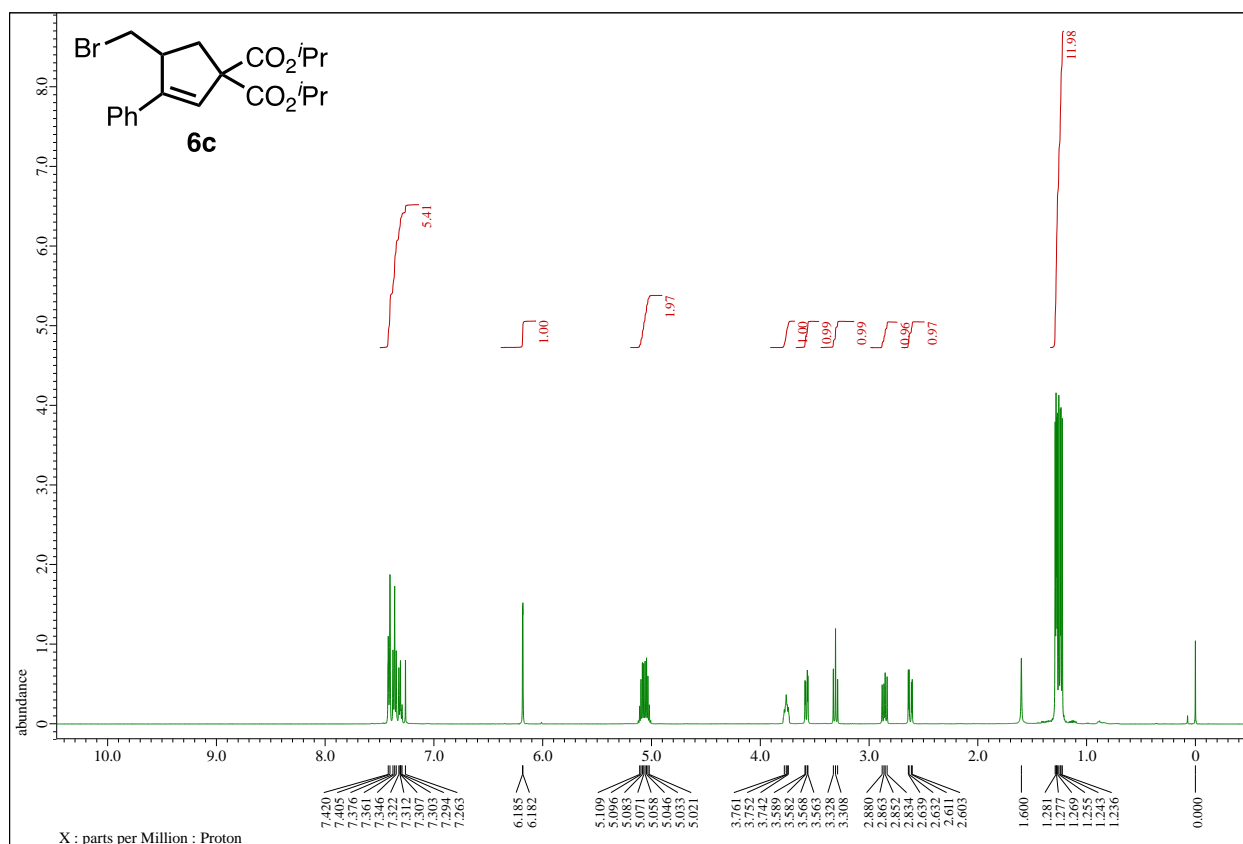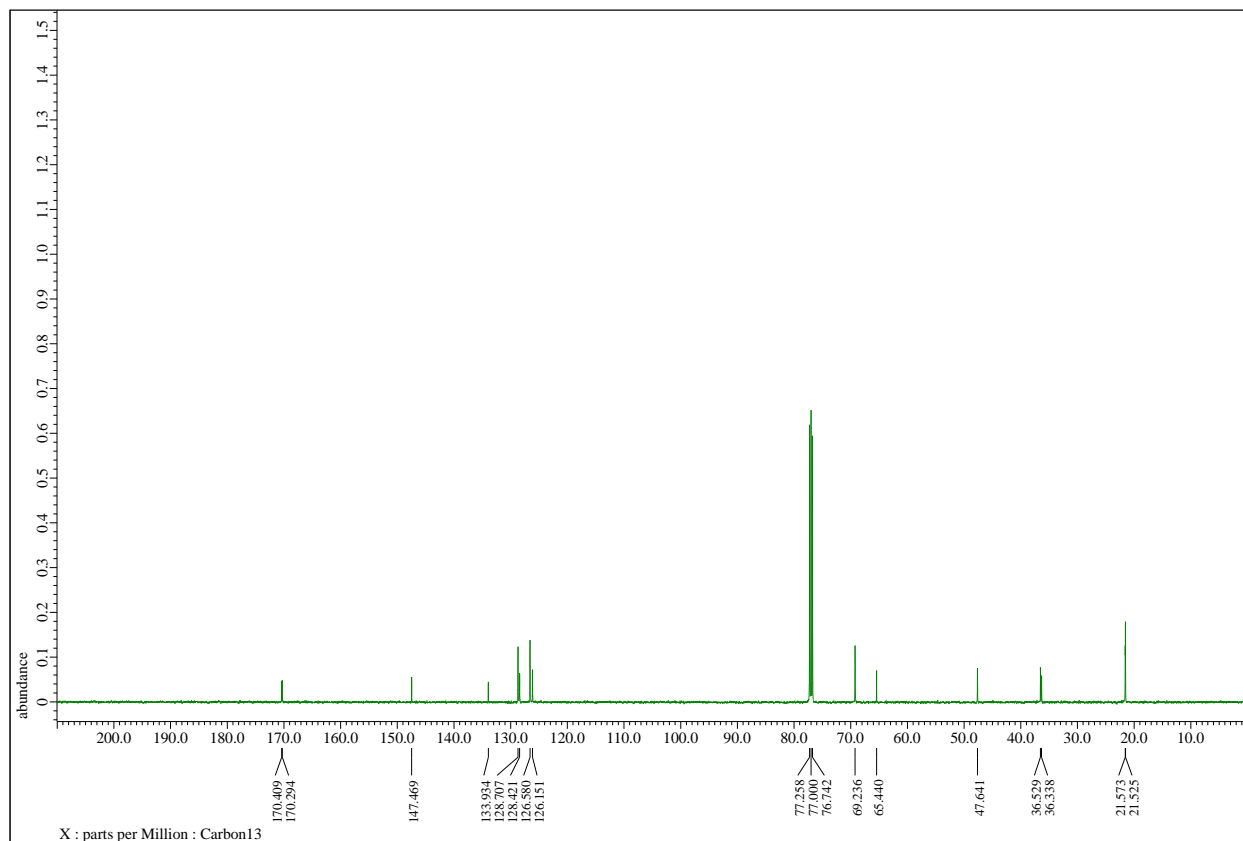

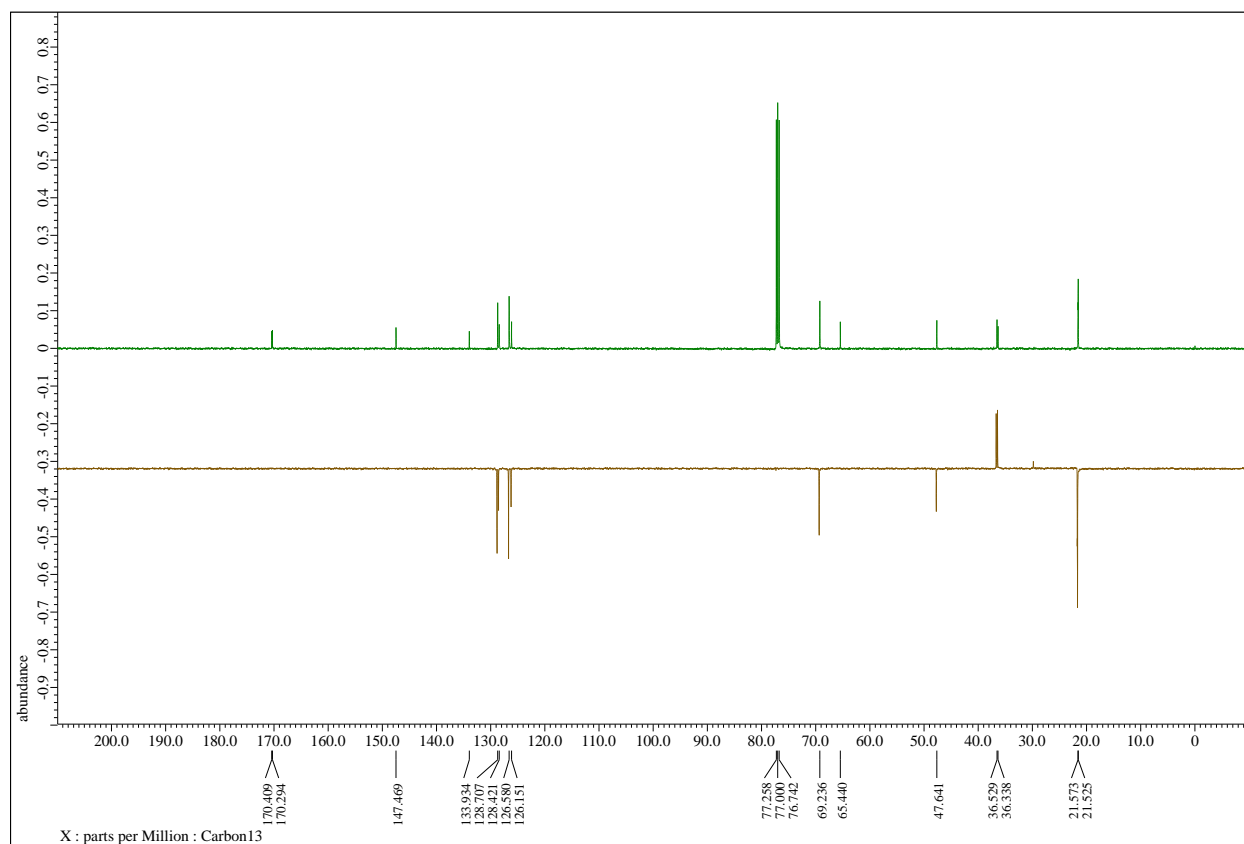

### - $^1\text{H}$ and $^{13}\text{C}$ NMR Spectra of 6d

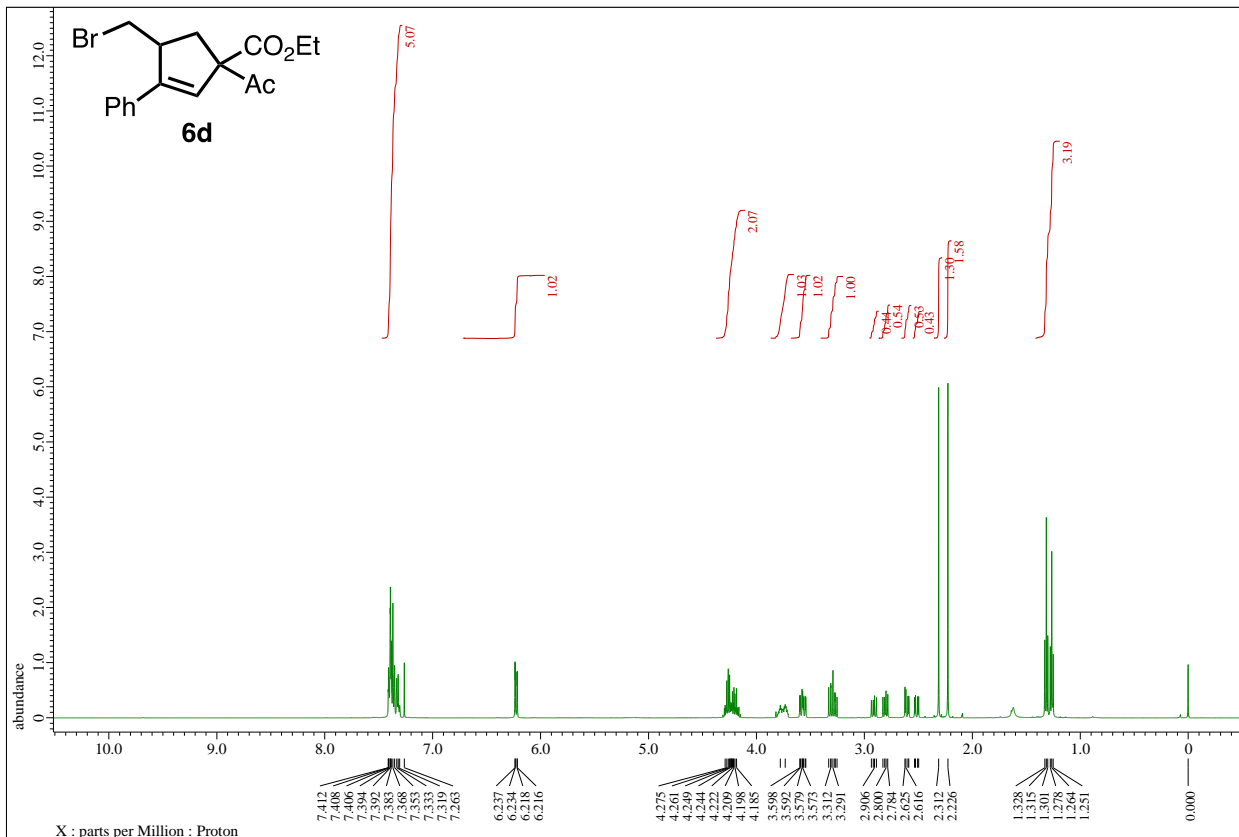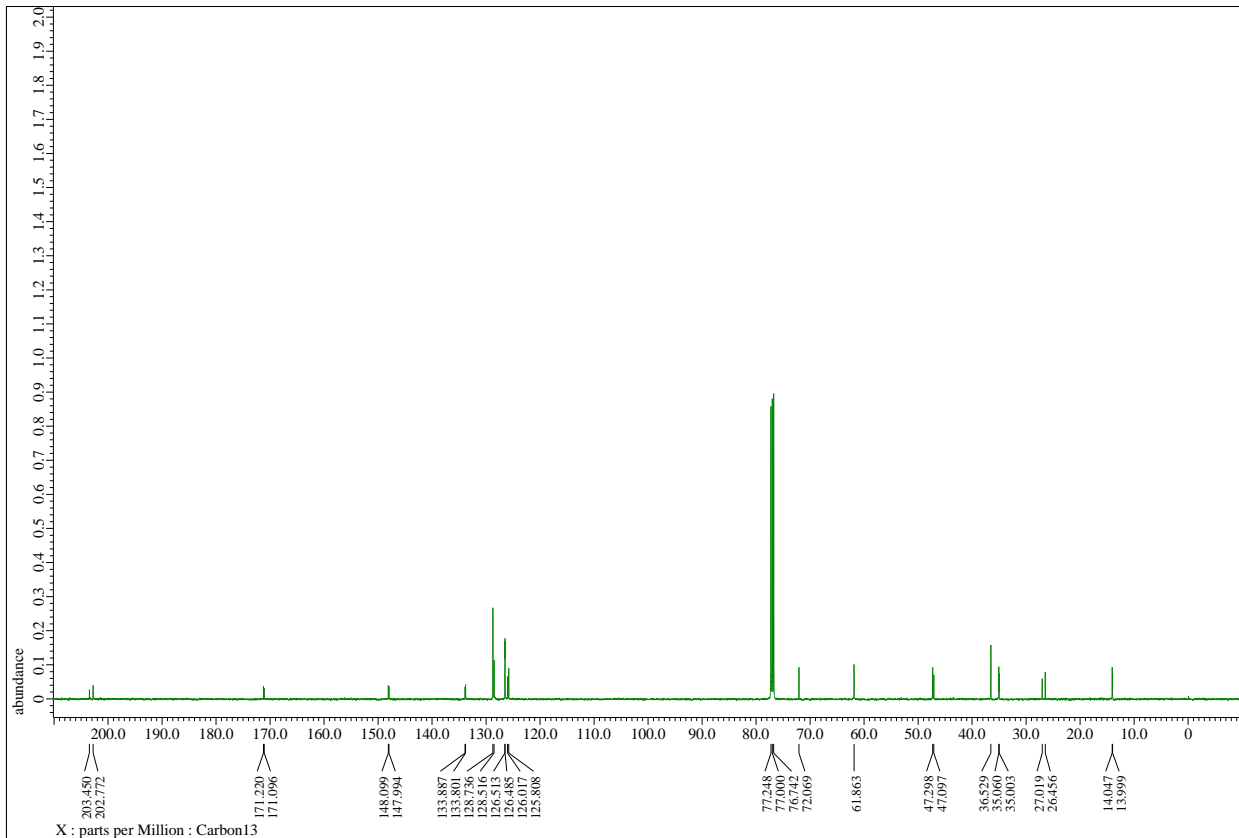

# - $^1\text{H}$ and $^{13}\text{C}$ NMR Spectra of 6e

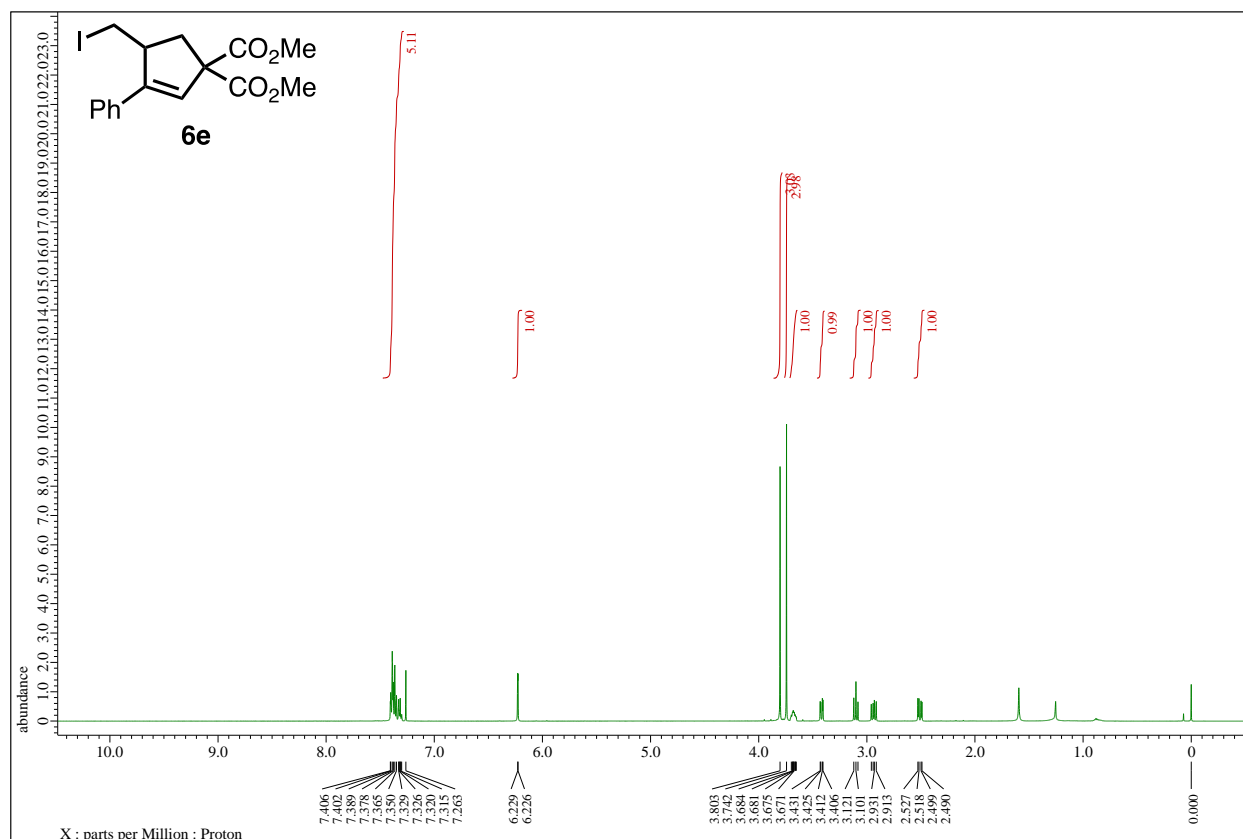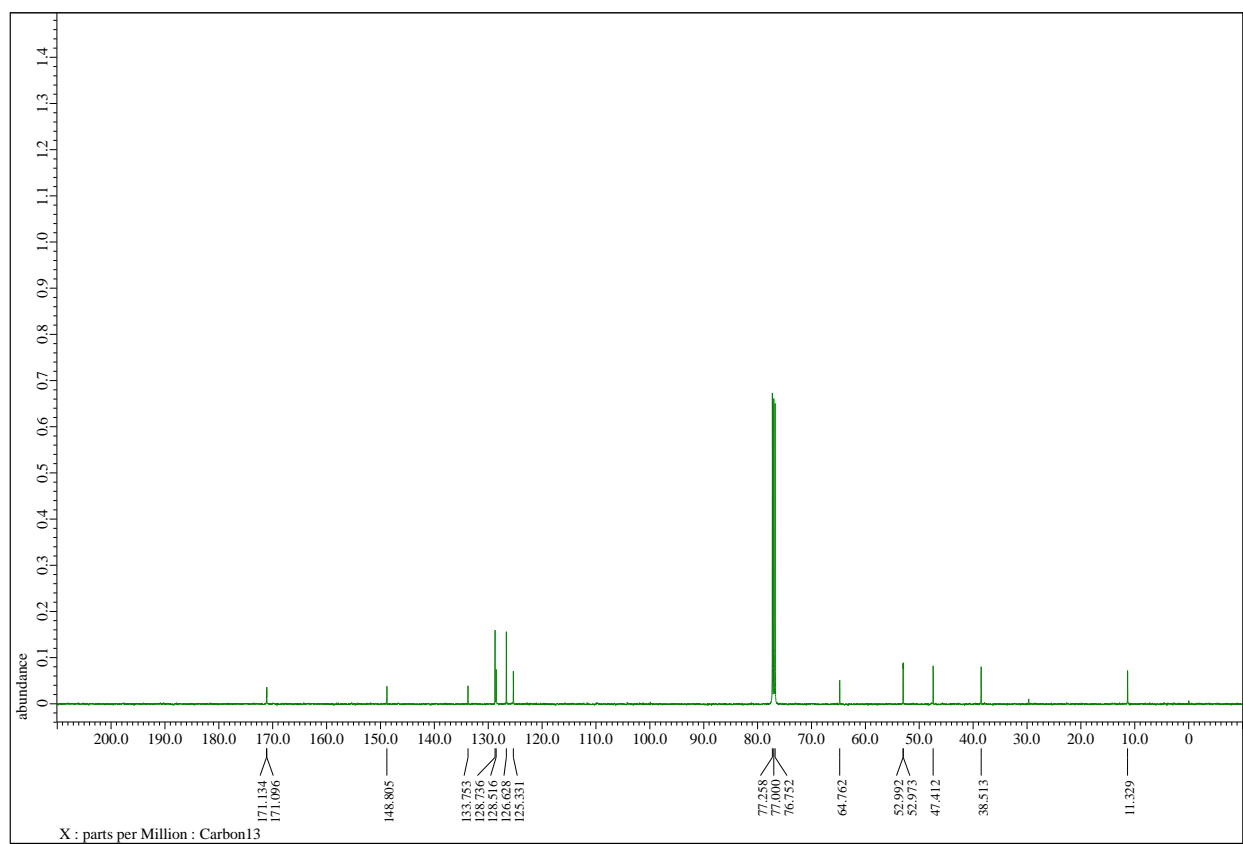

-  $^1\text{H}$ ,  $^{13}\text{C}$  and DEPT-135 NMR Spectra of **6f**

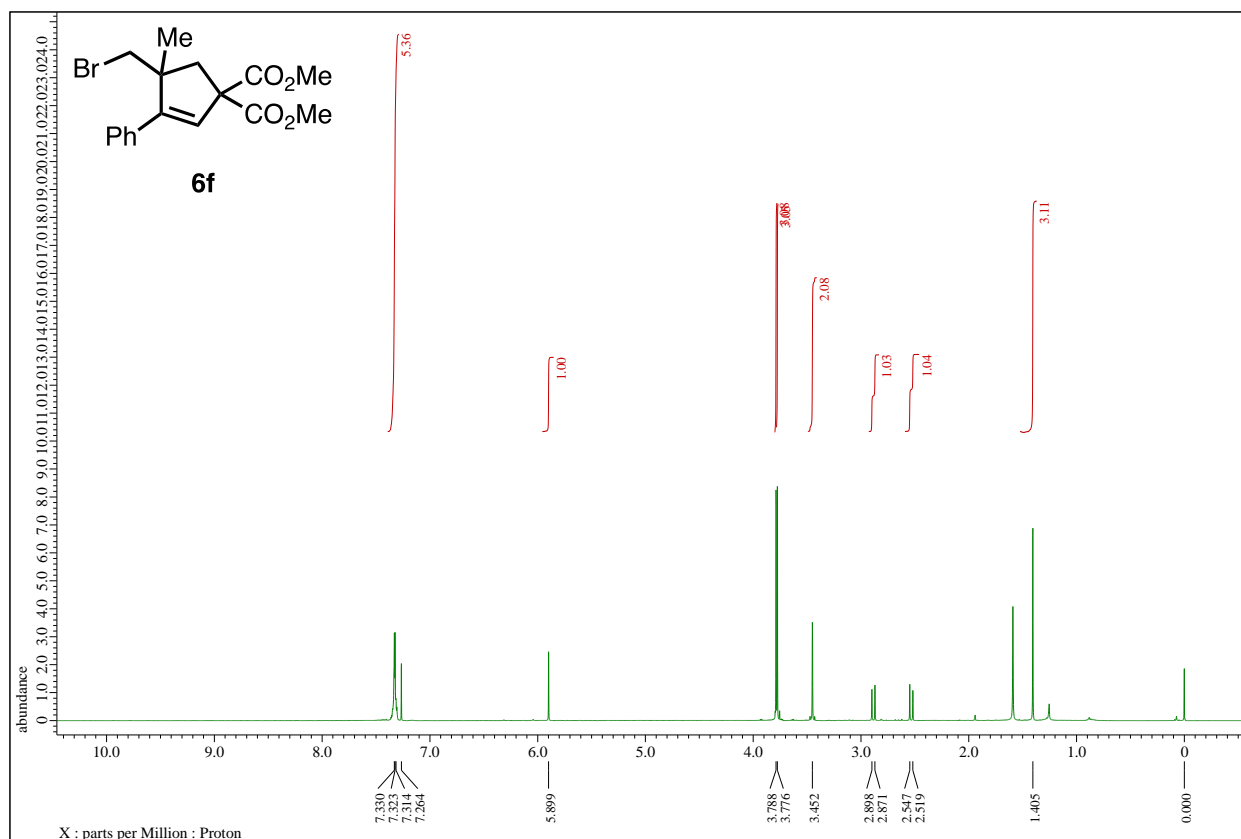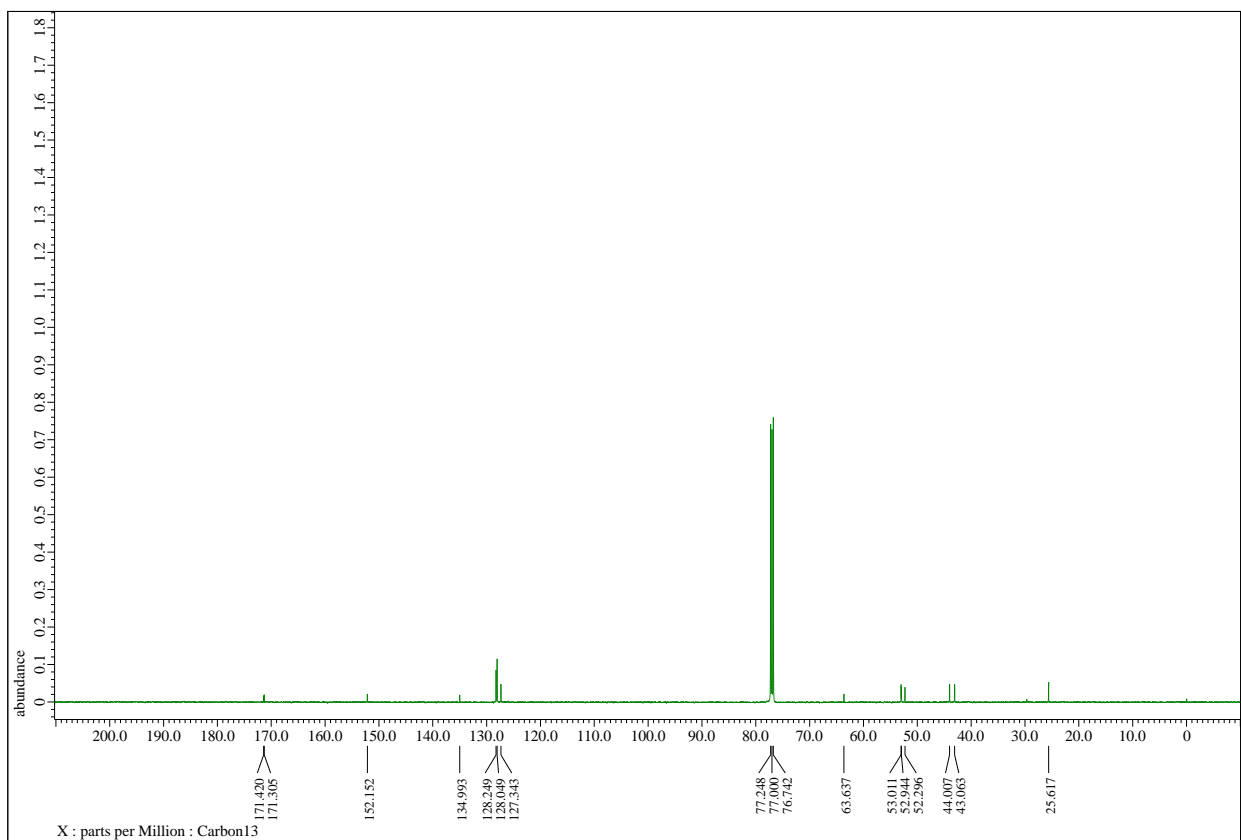



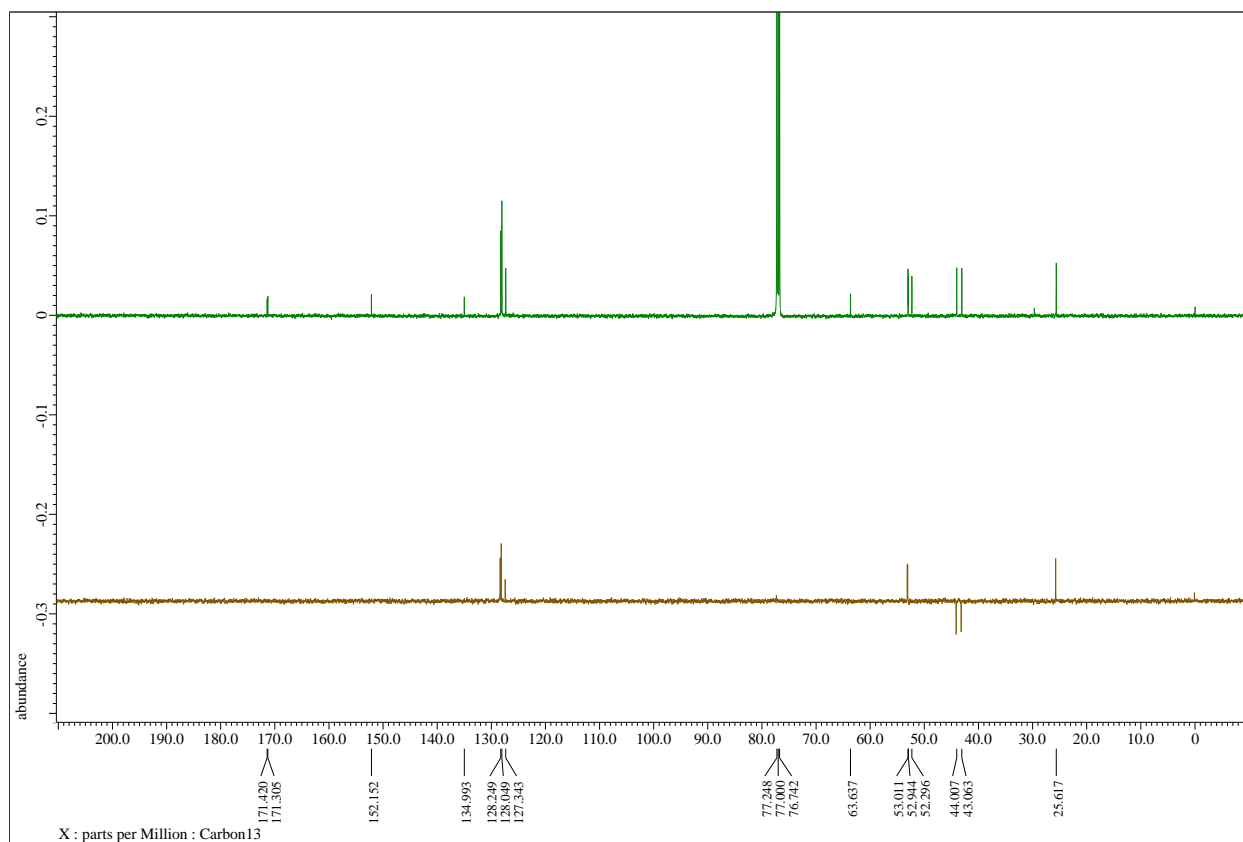

-  $^1\text{H}$ ,  $^{13}\text{C}$  and DEPT-135 NMR Spectra of 6g

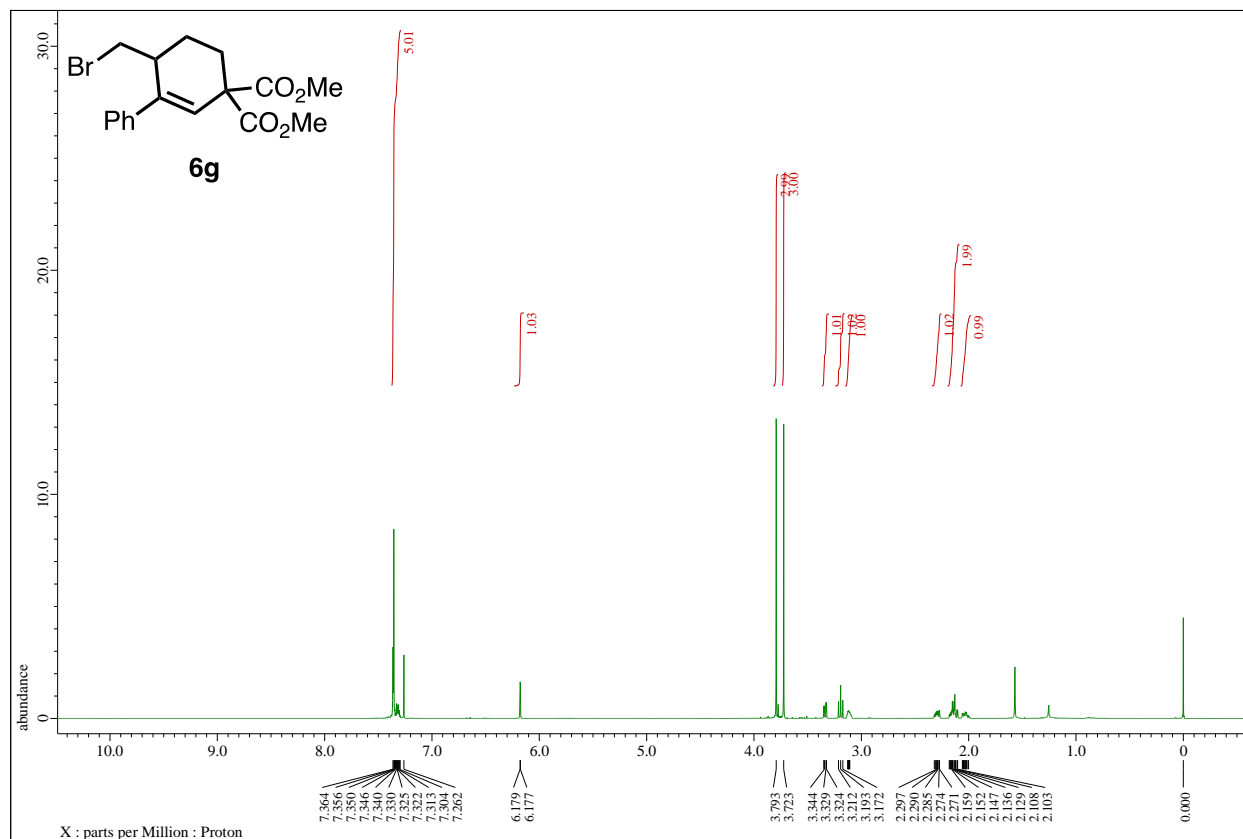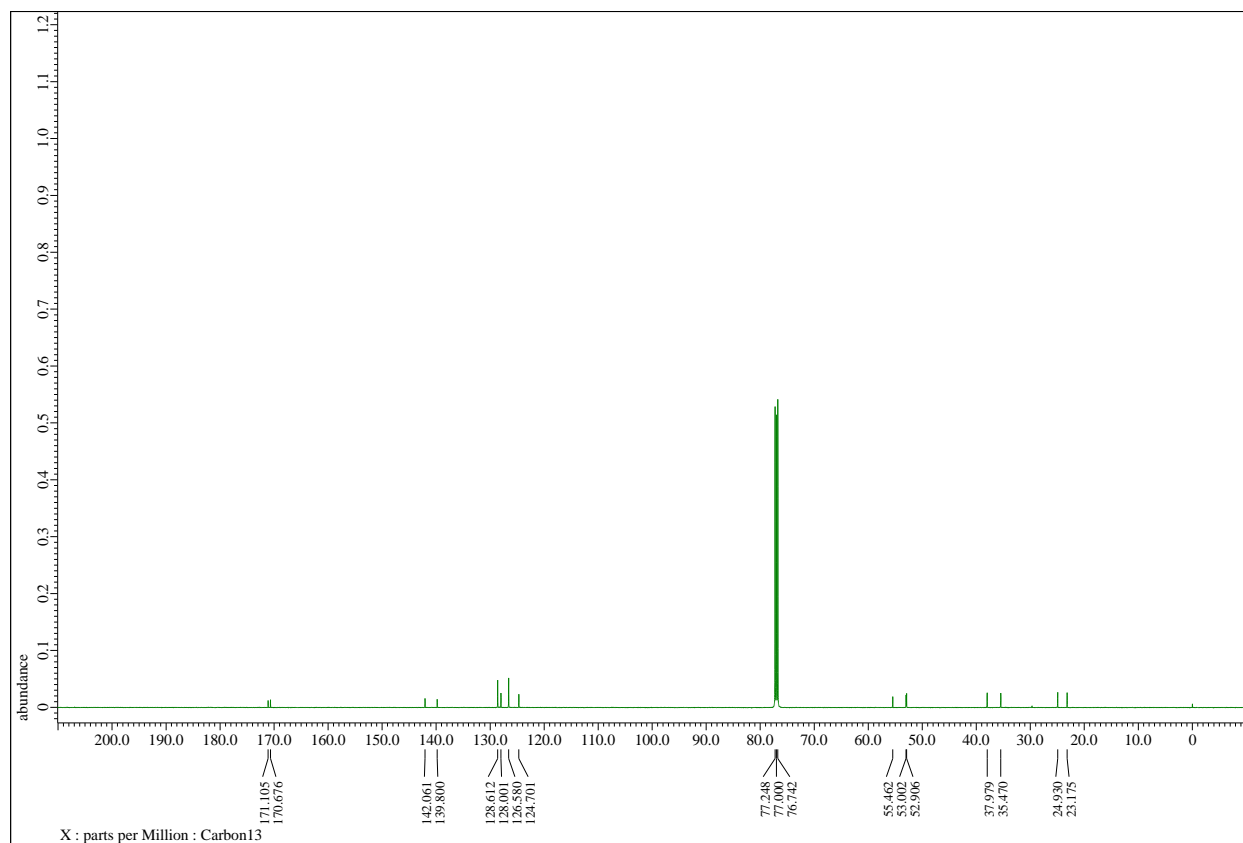

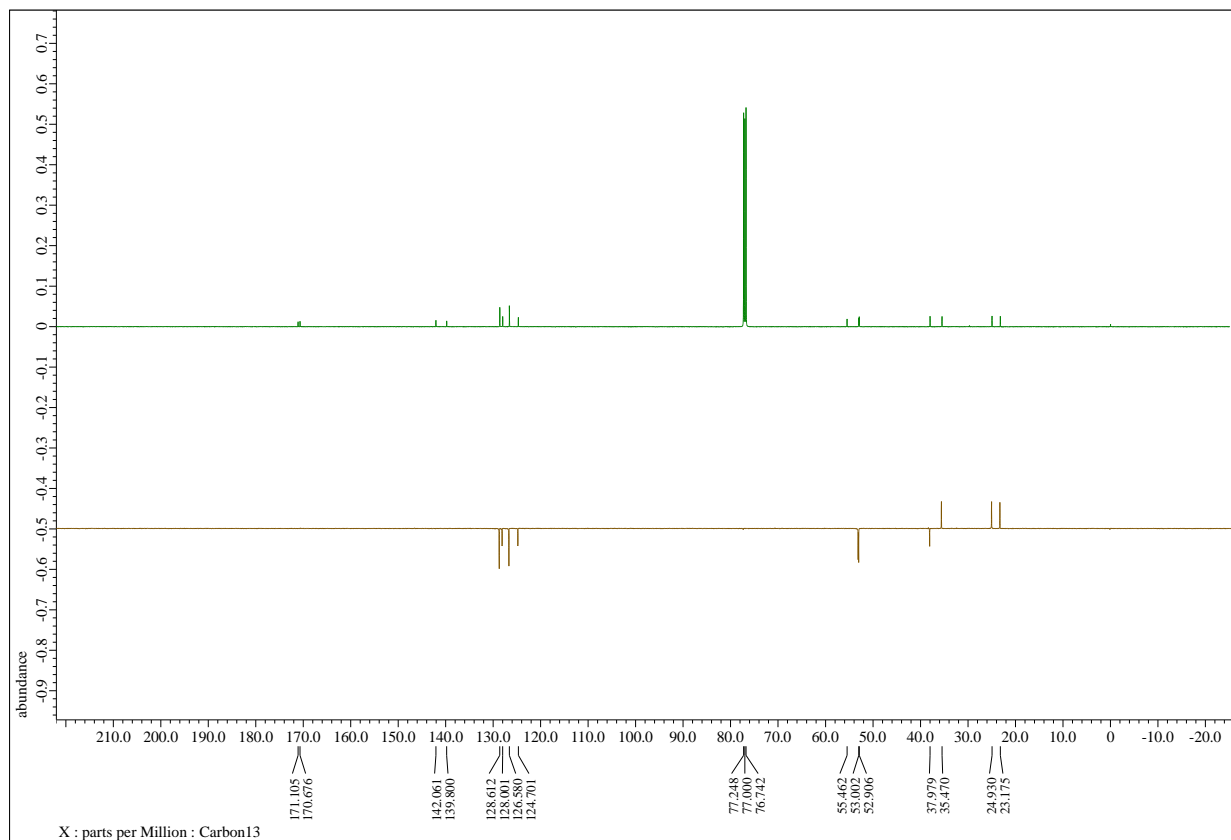

# - $^1\text{H}$ and $^{13}\text{C}$ NMR Spectra of 6h

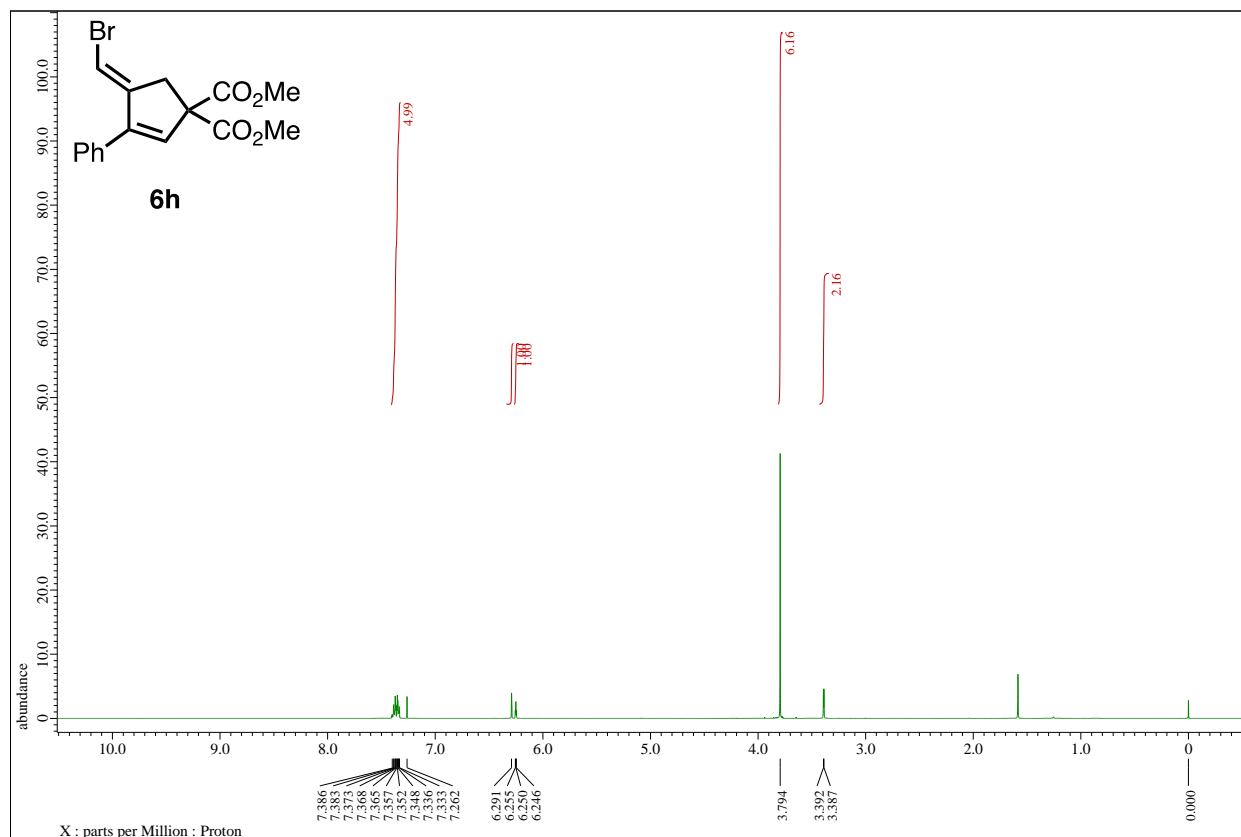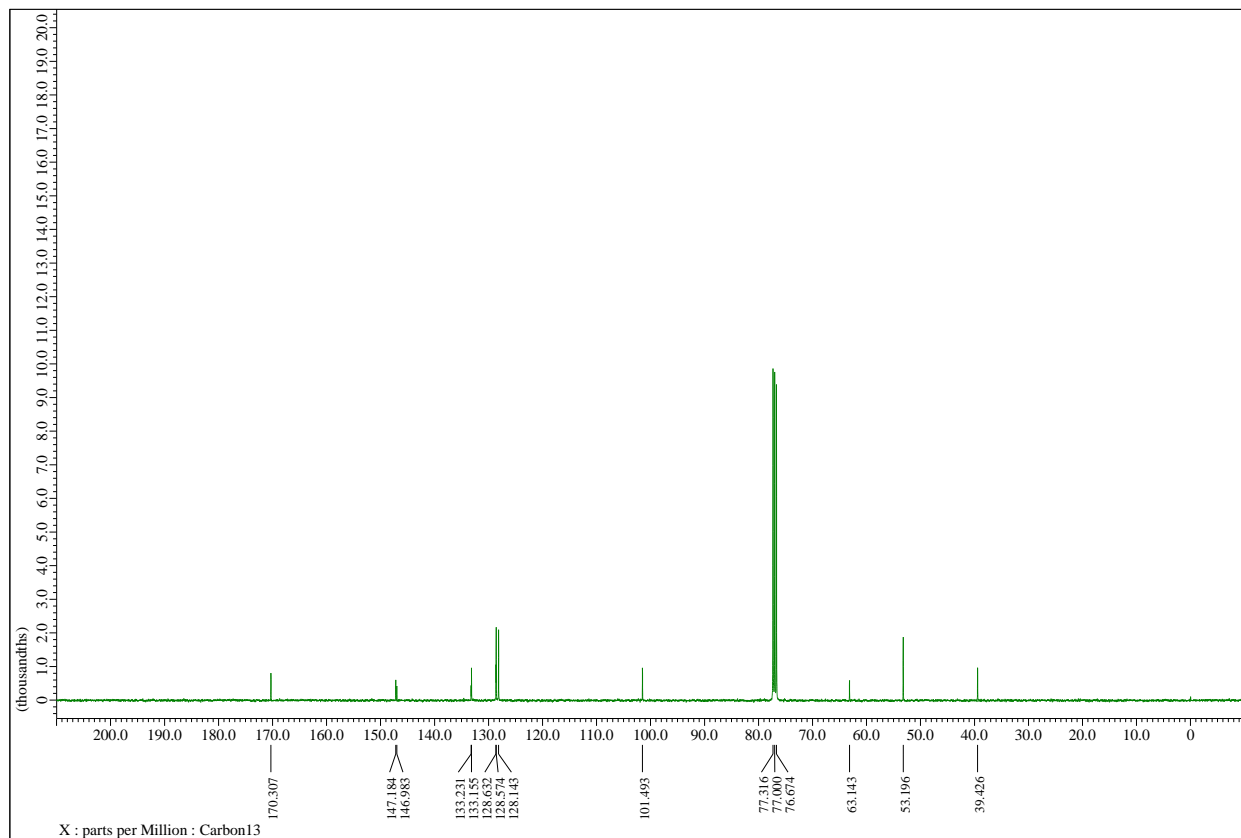

# 11. $^1\text{H}$ - $^1\text{H}$ NOESY spectrum of 6h

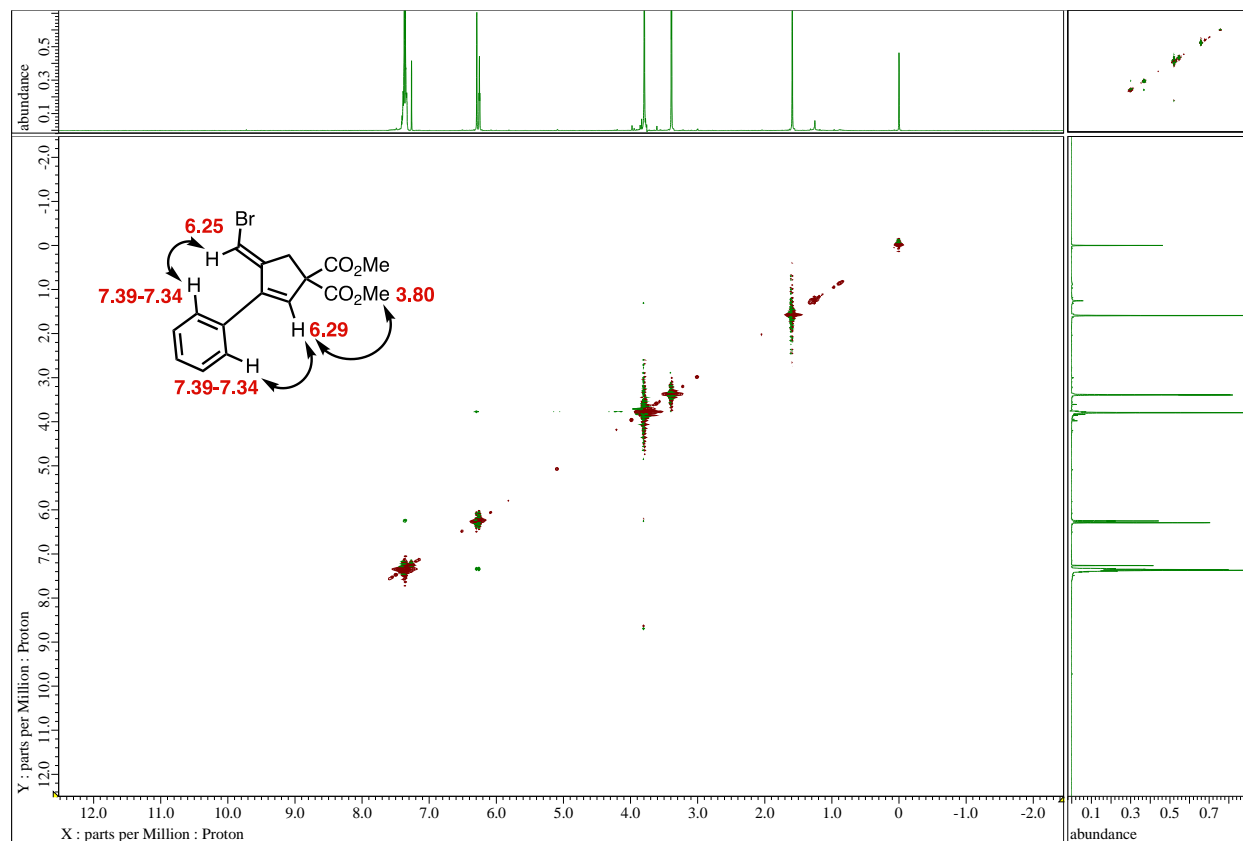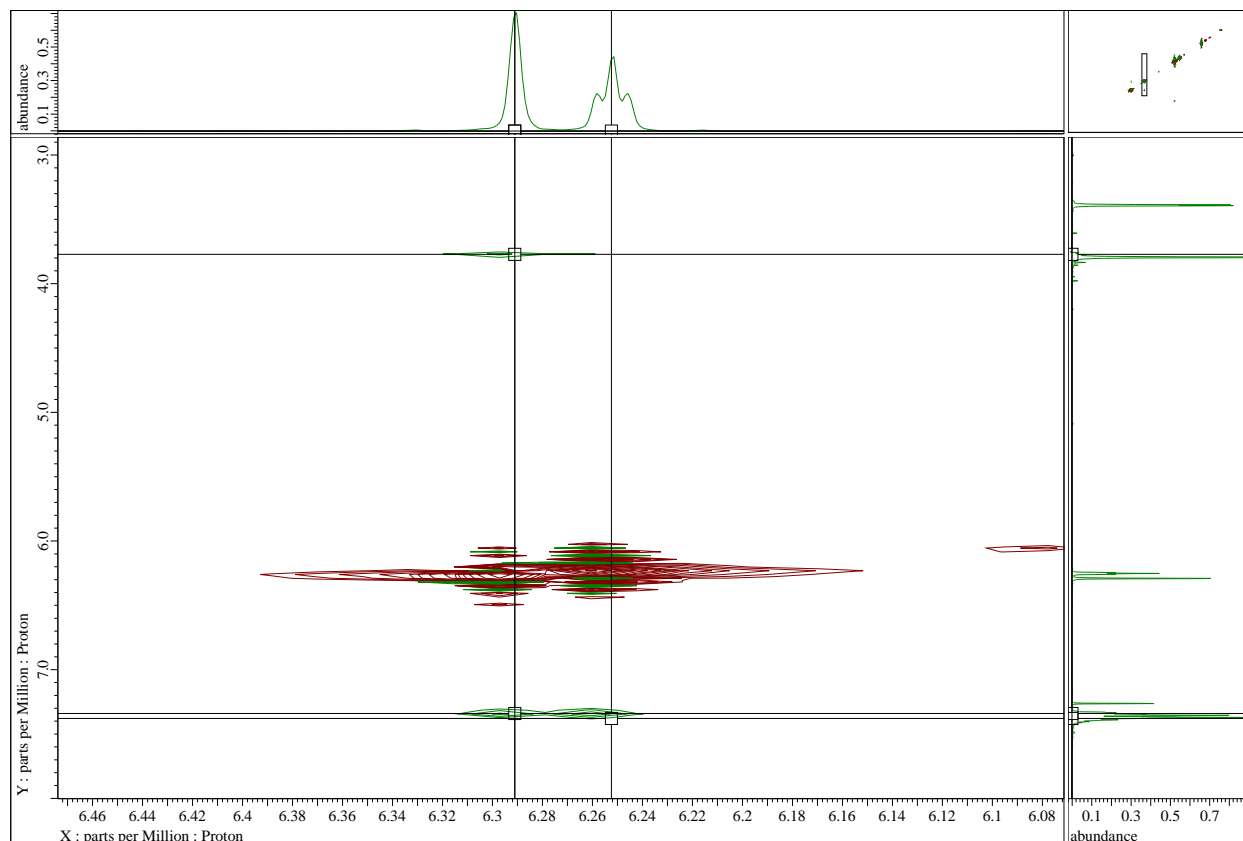

## 12. $^1\text{H}$ NMR, $^{13}\text{C}$ NMR, $^{19}\text{F}$ and DEPT-135 NMR Spectra of 7

### - $^1\text{H}$ and $^{13}\text{C}$ NMR Spectra of 7a

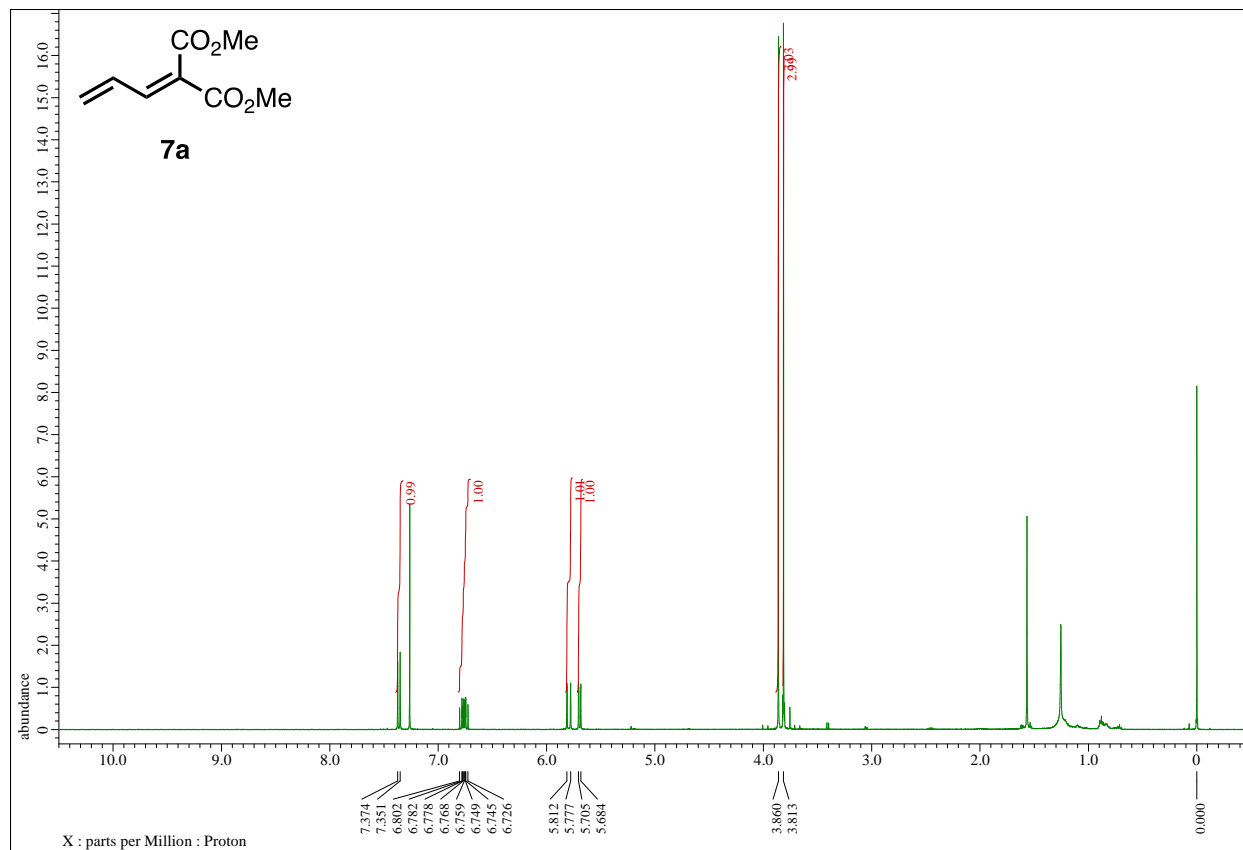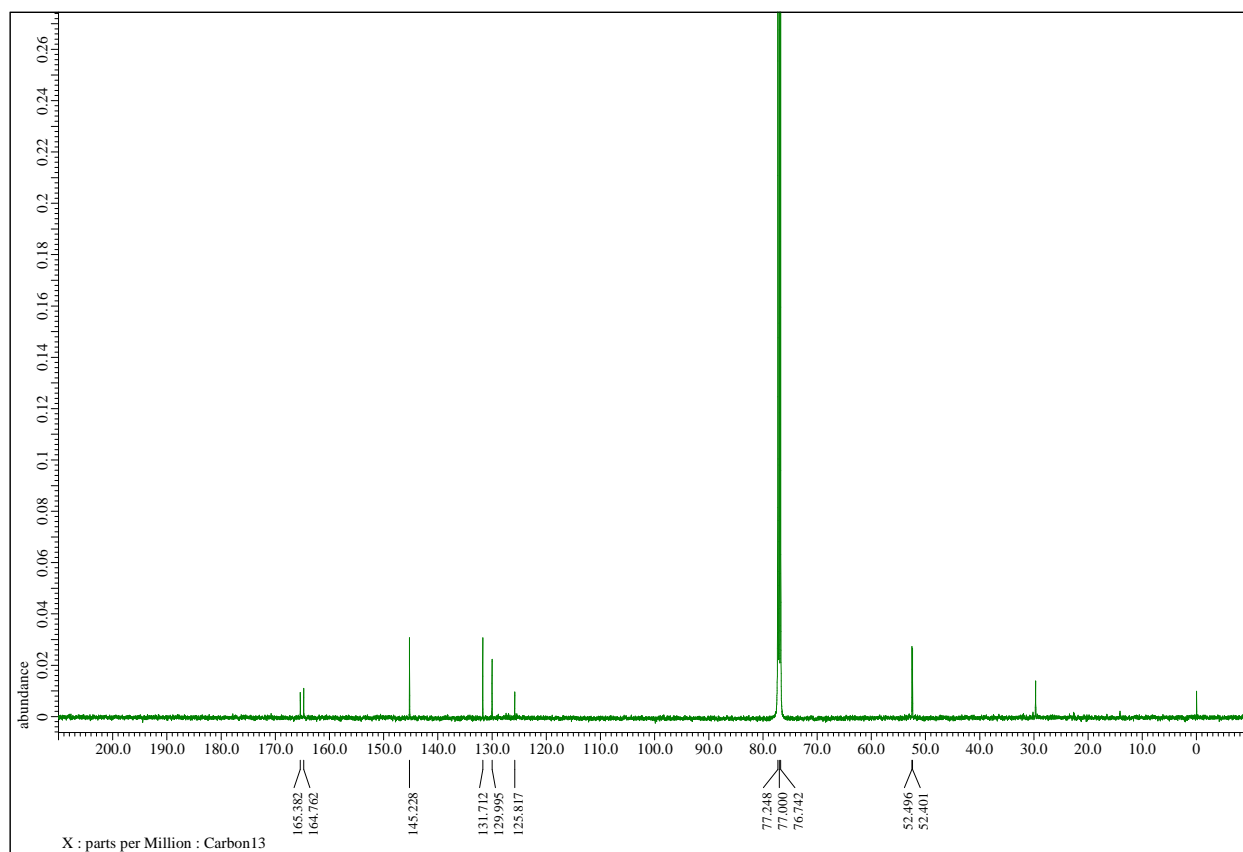

# - $^1\text{H}$ and $^{13}\text{C}$ NMR Spectra of 7b

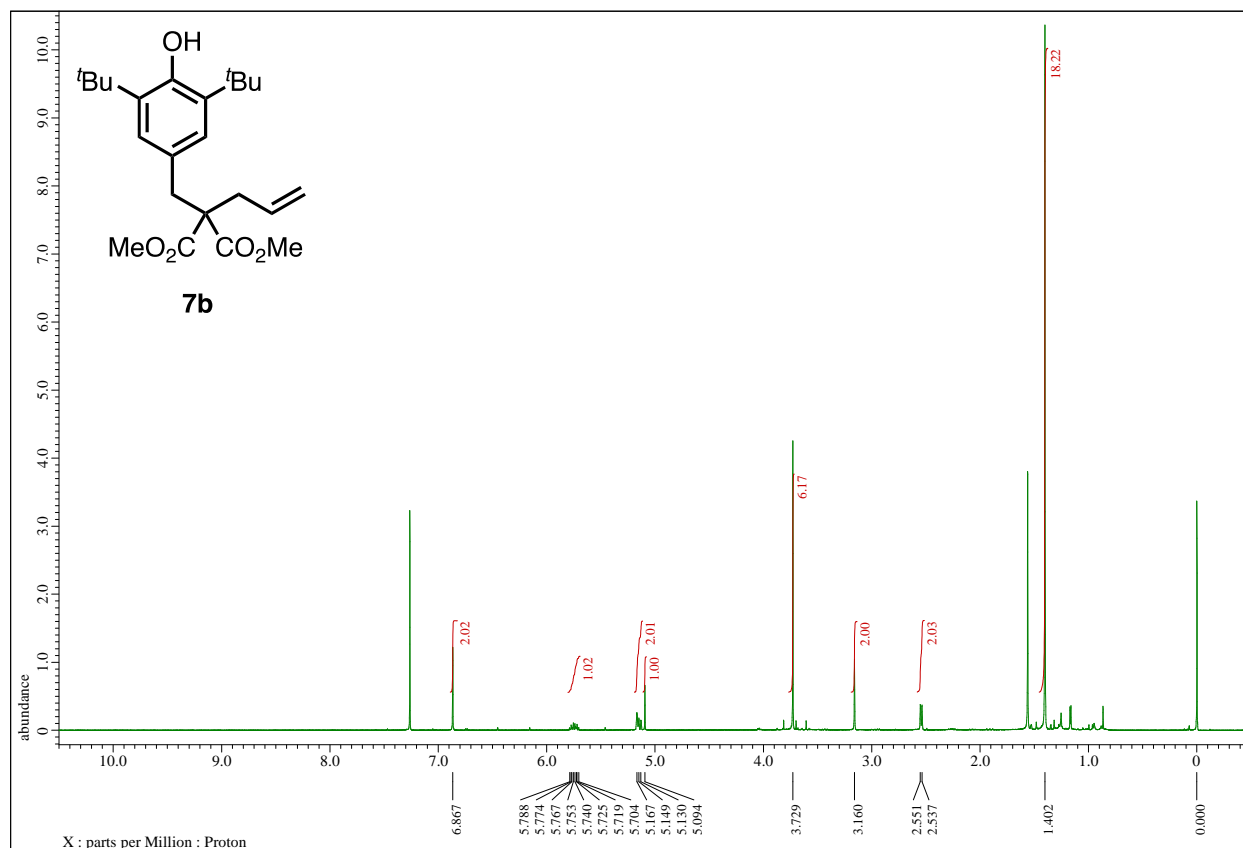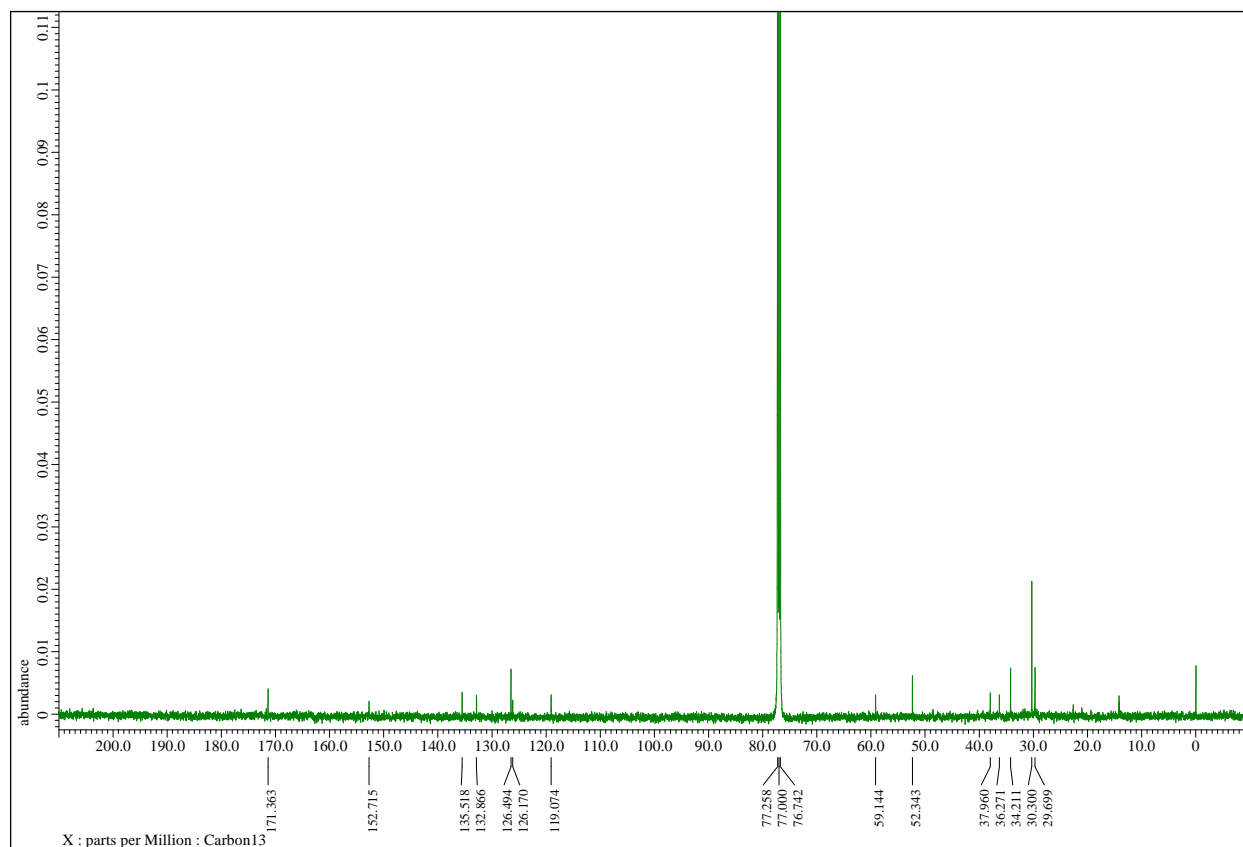

Supplement: s1 [file s1]
